# Supplementary material for: The FLUXNET2015 dataset and the ONEFlux processing pipeline for eddy covariance data
Source: PubMed Central journal article supplement (PMC7347557; doi:10.1038/s41597-020-0534-3), 2020-07-09
Supplement: 41597_2020_534_MOESM1_ESM.pdf [file 41597_2020_534_MOESM1_ESM.pdf]

## Table of contents for supplementary materials

|                                                                                                  |        |
|--------------------------------------------------------------------------------------------------|--------|
| Appendix SM1. FLUXNET2015 Variables Quick Start Guide                                            | 2-SM   |
| <i>Supplementary Materials: Figures</i>                                                          | 4-SM   |
| Supplementary Figure SM1. Distribution of sites by mean annual air temperature and precipitation | 5-SM   |
| Supplementary Figure SM2. The processing steps order and dependencies                            | 6-SM   |
| Supplementary Figure SM3. Workflow for method selection for the estimation of EBC_CF             | 7-SM   |
| Supplementary Figure SM4. Continental scale maps with site positions                             | 8-SM   |
| <i>Supplementary Materials: Tables</i>                                                           | 9-SM   |
| Table SM1. Complete variables list for FLUXNET2015 dataset                                       | *10-SM |
| Table SM2. Site General Information metadata                                                     | 11-SM  |
| Table SM3. DOI metadata                                                                          | 14-SM  |
| Table SM4. Publications metadata                                                                 | 15-SM  |
| Table SM5. Canopy Height metadata                                                                | 16-SM  |
| Table SM6. Variable Information metadata                                                         | 17-SM  |
| Table SM7. Predefined unit options                                                               | *18-SM |
| Table SM8. BADM Interchange Format (BIF) Description and Examples                                | 19-SM  |
| Table SM9. Co-author list and site affiliation                                                   | 21-SM  |

\* Long tables, placed at the end of the document.

## Appendix SM1. FLUXNET2015 Variables Quick Start Guide

This document is designed to guide non-expert users to quickly get started selecting variables from the FLUXNET2015 dataset. Key points are explained here, but we strongly recommend looking at documentation of the dataset to understand the different versions of variables, as the choice of variable can impact analysis results. See the main text of this paper and [online documentation](#) for more information, and for in depth questions, contact regional network teams or site teams.

**FLUXNET2015 data products.** Non-expert users can get started with the [FLUXNET2015 SUBSET](#) data product. Compared to the FULLSET product, SUBSET includes all the same sites and the complete temporal record, but only includes a selection of the variables, which should fit the required data for most users. All variables mentioned in this guide are available in the SUBSET data product.

**Quality flags and gap-filled data.** The \*\_QC variables are quality control flags for the records of associated variables, identifying originally measured or gap-filled values, along with a quality indicator in the latter case. For instance, TA\_F\_QC is the quality flag for the gap-filled air temperature variable TA\_F. At the half-hourly or hourly resolution (HH), the \_QC variable indicates if the corresponding record is a measured value (\*\_QC=0), or the quality level of the gap-filling that was used for that record (\*\_QC=1 better, \*\_QC=3 worse quality). At coarser temporal resolutions, i.e., daily (DD) through yearly (YY), the quality flag indicates the **percentage of measured (\*\_QC=0) or good quality gap-filled (\*\_QC=1) records** aggregated from finer temporal resolutions.

**CO<sub>2</sub> Flux Variables.** CO<sub>2</sub> fluxes are key in the dataset, being the variable with most related variables and versions produced. The main versions of CO<sub>2</sub> variables discussed in this guide cover Net Ecosystem Exchange (NEE), Ecosystem Respiration (RECO), and Gross Primary Production (GPP).

**NEE:** the variable proposed in the SUBSET product is **NEE\_VUT\_REF** since it maintains the temporal variability (as opposed to the MEAN NEE), it is representative of the ensemble, and the VUT method is sensitive to possible changes of the canopy (density and height) and site setup. The FULLSET includes other versions such the CUT where the same USTAR threshold is used for all the years, removing possible variability in the NEE due to the threshold value or the MEAN that is the average of the ensembles (which smooths over the variability). The other NEE variables in SUBSET represent uncertainty estimates: random uncertainty from measurements (NEE\_VUT\_REF\_RANDUNC) and the uncertainty due to the USTAR threshold-based filtering (NEE\_VUT\_XX; see USTAR uncertainty details below).

**RECO and GPP:** in the SUBSET product there are two main versions of GPP and RECO. They originate from two CO<sub>2</sub> flux partitioning methods adopted for FLUXNET2015: nighttime (NT) and daytime (DT). The two methods are independent, making their consistency an indicator of the robustness of the estimates. Without a context in which they are being used, it is impossible to give a-priori preference to one or the other. Our suggestion is to use both daytime (DT) and nighttime (NT) variables and consider their difference as uncertainty. Alternatively, users can filter the sites to use in the analysis based on the consistency between the two products. Being highly dependent on site and time-aggregation, the difference between the two partitioning methods can reach, at an annual time resolution, over 500 gC m<sup>-2</sup> yr<sup>-1</sup>. The RECO and GPP products in SUBSET are calculated from the corresponding NEE variables filtered with the VUT method, generating **RECO\_NT\_VUT\_REF** and **RECO\_DT\_VUT\_REF** for RECO, and **GPP\_NT\_VUT\_REF** and **GPP\_DT\_VUT\_REF** for GPP. As for the NEE variable above, GPP and RECO also include variables describing the uncertainty due to USTAR threshold-based filtering (see USTAR uncertainty details next).

**USTAR Uncertainty:** the uncertainty stemming from the USTAR threshold estimation is the main source of uncertainty for this dataset. An ensemble of USTAR thresholds are applied to filter NEE and the resulting versions of NEE are represented through percentiles (NEE\_VUT\_XX). The effect of the USTAR threshold uncertainty is also site and time-aggregation dependent, with an interquartile range at annual scale that can be up to 200 gC m<sup>-2</sup> year<sup>-1</sup>. The ensemble of NEE versions originated using the different thresholds are all put through the partitioning with the two methods, resulting in versions of RECO and GPP also represented by percentiles (RECO\_NT\_VUT\_XX/RECO\_DT\_VUT\_XX and GPP\_NT\_VUT\_XX/GPP\_DT\_VUT\_XX).

**Energy and Water Flux Variables.** The main variables for Latent and Sensible Heat fluxes are **LE\_F\_MDS** and **H\_F\_MDS**, respectively, both gap-filled and with quality flags. Similarly from NEE, random uncertainty from measurements are estimated (LE\_RANDOMUNC and H\_RANDOMUNC). If the intended use requires ensuring the energy-balance closure, a version of LE and H is provided for which the closure is enforced using the Bowen ratio method (see paper for details): **LE\_CORR** and **H\_CORR**. These versions also include uncertainty estimation for the half-hourly and daily time resolution (LE\_CORR\_25/H\_CORR\_25 and LE\_CORR\_75/H\_CORR\_75).

## Supplementary Materials: Figures

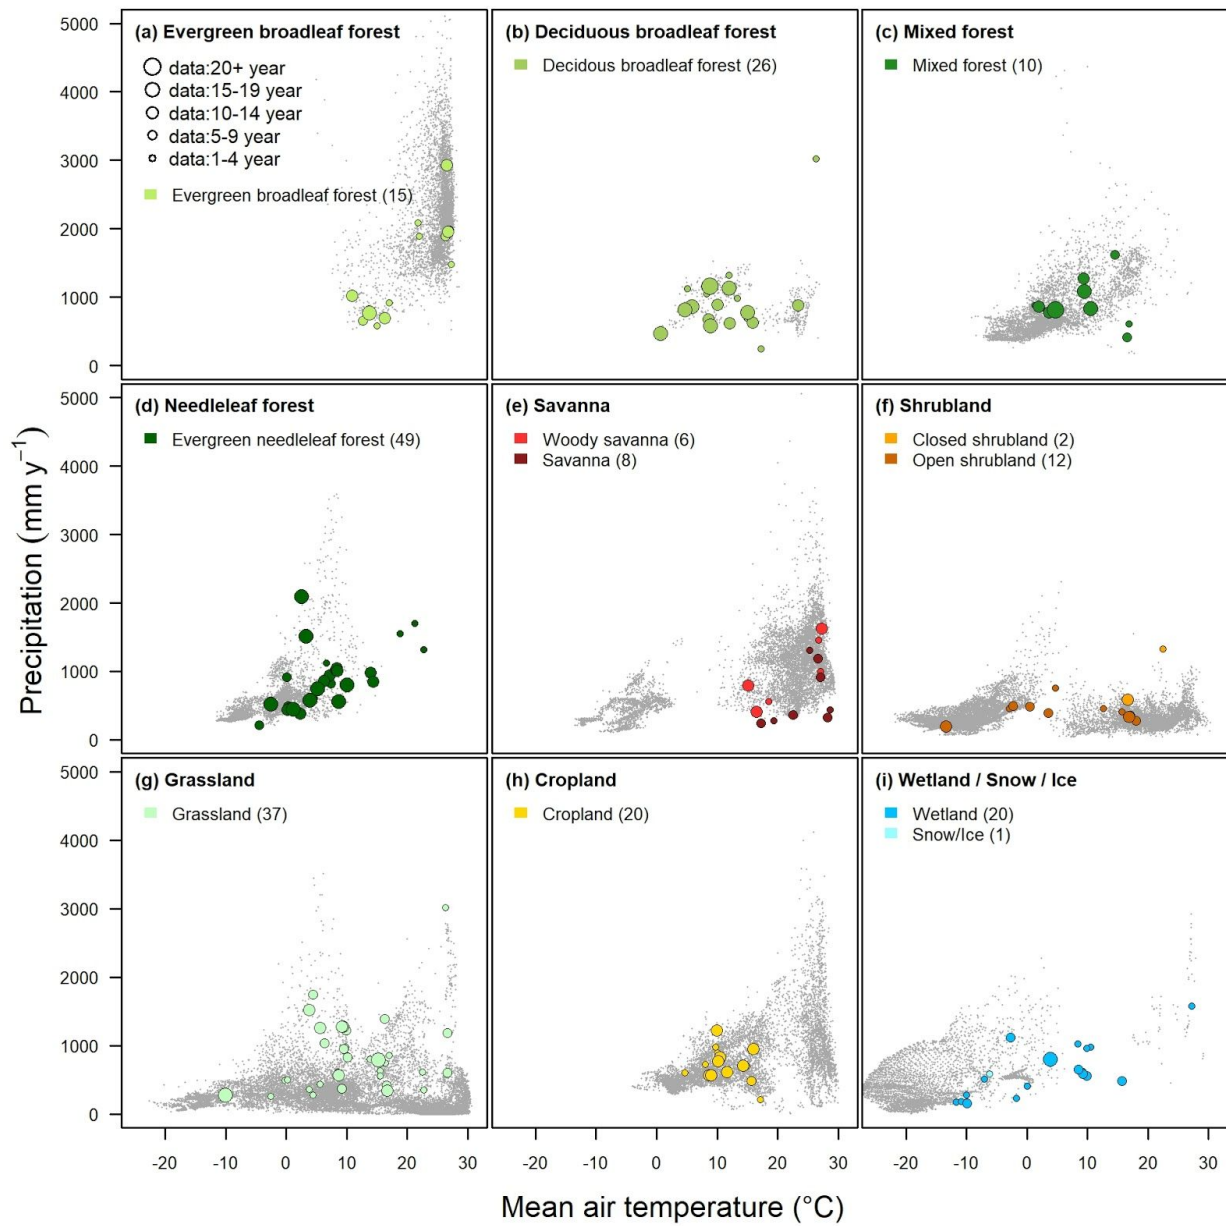

**Supplementary Figure SM1.** Distribution of sites by mean annual air temperature and precipitation. Tower locations are shown as circles, with vegetation type in color based on the IGBP definitions. The size of the circle indicates the length of the data record. Numbers in parentheses indicate the number of sites in each IGBP group. Gray dots represent annual mean temperature and total precipitation from the Climatic Research Unit (CRU) time series (TS) 3.23 gridded dataset from 1981 to 2014<sup>251</sup> and land cover types from the global mosaics of the MODIS land cover type data<sup>252</sup>, both at 0.5° resolution.

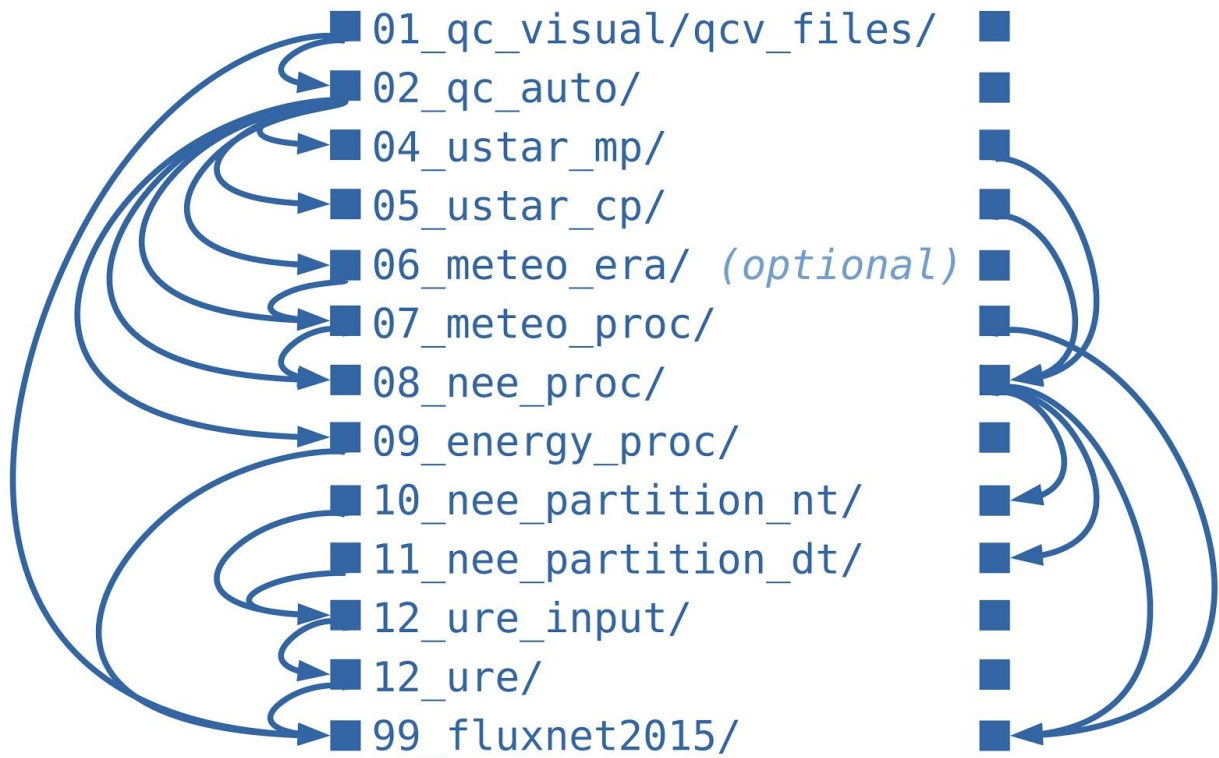

**Supplementary Figure SM2.** The processing steps as they are executed in the code collection package ONEFlux, with the order of execution (numbers) and their dependencies (arrows).

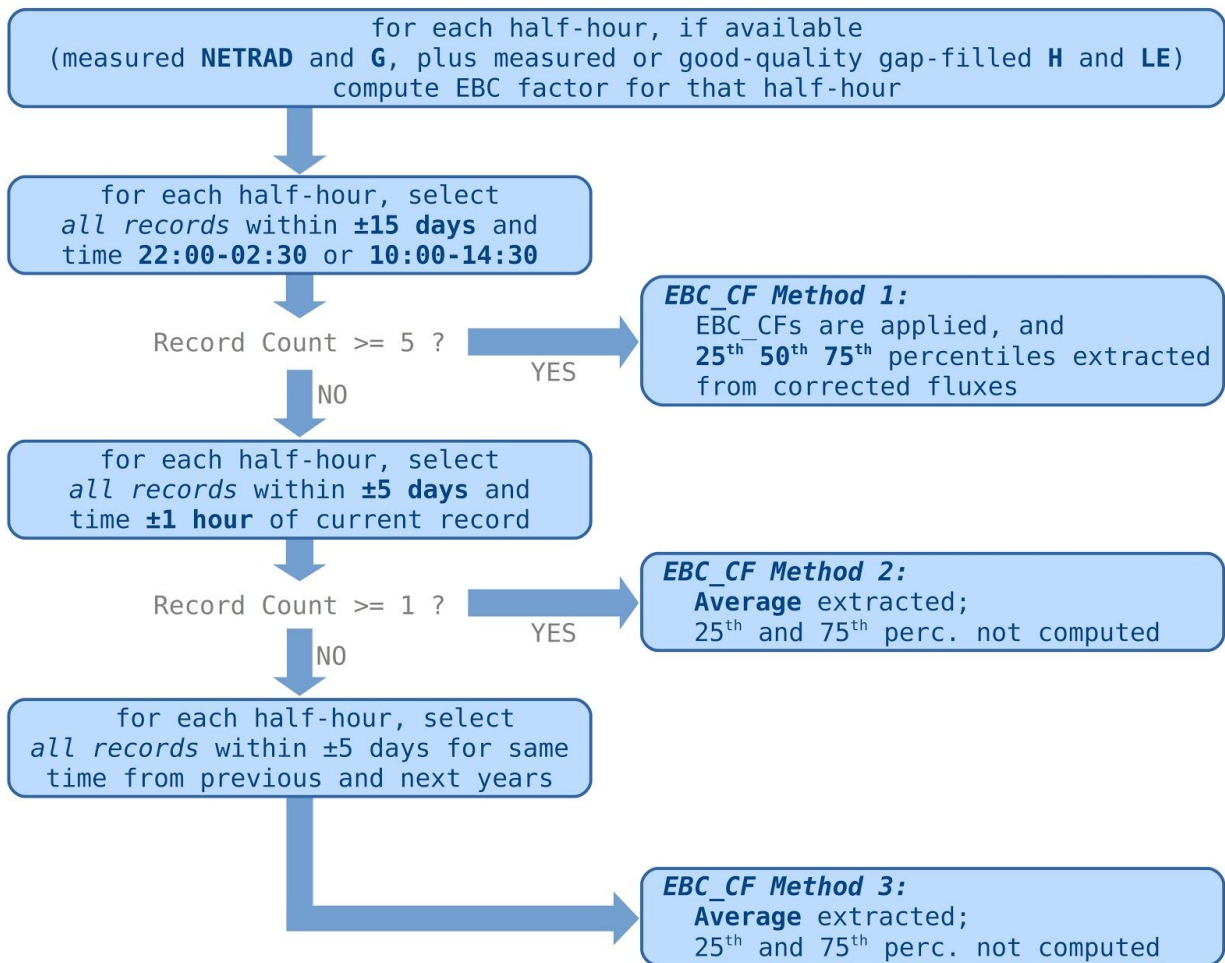

**Supplementary Figure SM3.** Workflow illustrating the method selection for the estimation of the correction factor (EBC\_CF) to be applied to sensible (H) and latent heat (LE) fluxes, in order to ensure the energy balance closure. This figure shows the proceeding for half-hourly data. See energy and water products section in main text for more details and differences to other temporal resolutions.

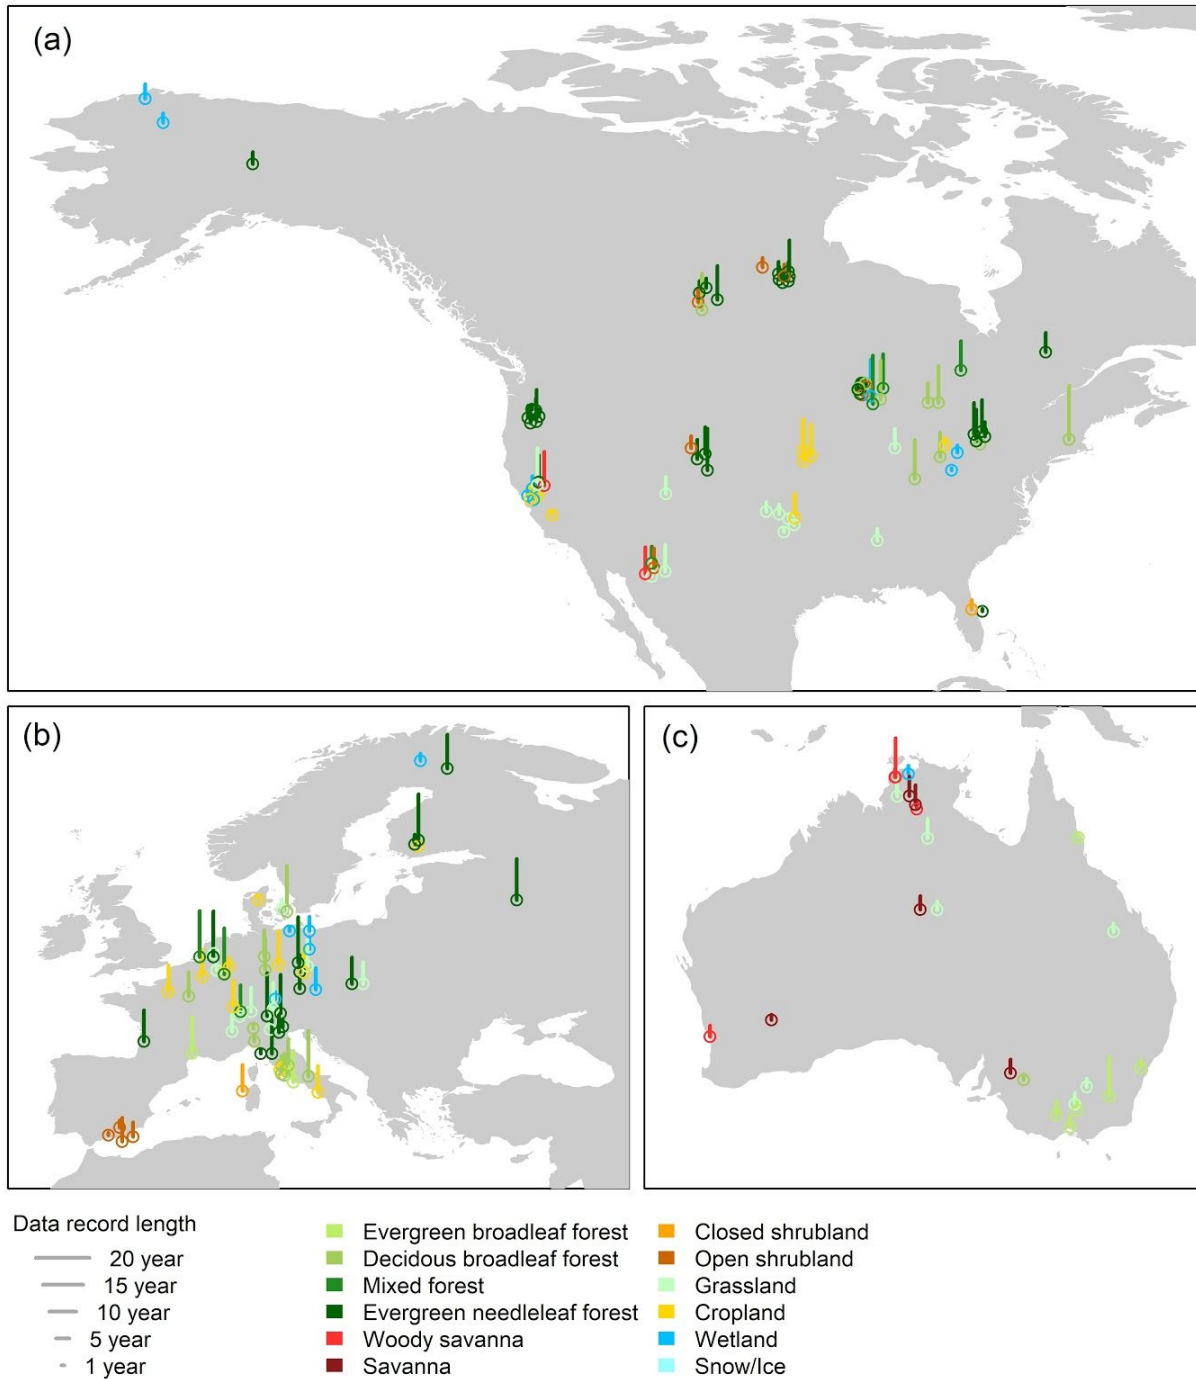

**Supplementary Figure SM4.** Companion figure to Fig. 1 in the main text. Continental scale maps with site positions, allowing better visualization of denser concentration of sites. Panel (a) shows upper North America, (b) Europe, and (c) Australia. As in Fig. 1, color indicates IGBP class, and here height of bar indicates length of record. When overlapping, locations are offset slightly to improve readability.



## Supplementary Materials: Tables

**Table SM1.**

See

***“The FLUXNET2015 dataset and the ONEFlux processing pipeline for eddy covariance data—Supplementary Materials, Table SM1”***

placed at the end of the document.

**Table SM2.** Site General Information metadata. Required variables collected from or generated for each site are marked with an asterisk (\*). Other metadata types include DOI, References, Canopy Height, and Variable Information, described in Tables S3-S6. Pre-defined options for all units are listed in Table S7. Note that all metadata files use the format YYYYMMDDHHMM for timestamps, and can be truncated at different appropriate resolutions (e.g., YYYYMMDD for a date or YYYYMM for a month).

| Variable                     | Description / Units                                                                                                                                               |
|------------------------------|-------------------------------------------------------------------------------------------------------------------------------------------------------------------|
| ACKNOWLEDGEMENT              | Acknowledgement text                                                                                                                                              |
| ACKNOWLEDGEMENT_COMMENT      | Additional information about the acknowledgement                                                                                                                  |
| ASPECT                       | Direction the site is facing (Exposure)<br><i>Units: see options for ASPECT in Table S7.</i>                                                                      |
| COUNTRY*                     | Country<br><i>Units: see options for COUNTRY in Table S7.</i>                                                                                                     |
| DOM_DIST_MGMT                | Recent and historic disturbance and management events that affect the tower site years of measurement<br><i>Units: see options for DOM_DIST_MGMT in Table S7.</i> |
| FLUX_MEASUREMENTS_VARIABLE   | Flux variable measured<br><i>Units: see options for FLUX_MEASUREMENTS_VARIABLE in Table S7.</i>                                                                   |
| FLUX_MEASUREMENTS_METHOD     | Method used to measure the flux variables<br><i>Units: see options for FLUX_MEASUREMENTS_METHOD in Table S7.</i>                                                  |
| FLUX_MEASUREMENTS_OPERATIONS | Operational status of flux measurements<br><i>Units: see options for FLUX_MEASUREMENTS_OPERATIONS in Table S7.</i>                                                |
| FLUX_MEASUREMENTS_DATE_START | Date when data collection for the reported flux variable/method started<br><i>Units: YYYYMMDDHHMM</i>                                                             |
| FLUX_MEASUREMENTS_DATE_END   | Date when data collection for the reported flux variable/method ended<br><i>Units: YYYYMMDDHHMM</i>                                                               |
| FLUX_MEASUREMENTS_COMMENT    | Flux measurements comments                                                                                                                                        |
| IGBP*                        | Vegetation type based on the IGBP definition                                                                                                                      |

The FLUXNET2015 dataset and the ONEFlux processing pipeline for eddy covariance data  
Supplementary Materials

|                      |                                                                                                      |
|----------------------|------------------------------------------------------------------------------------------------------|
|                      | <i>Units: see pre-defined options for IGBP in Table S7.</i>                                          |
| IGBP_DATE_START      | Date when this vegetation type first applied<br><i>Units: YYYYMMDDHHMM</i>                           |
| IGBP_COMMENT         | Vegetation type comments                                                                             |
| LAND_OWNER           | Land owner                                                                                           |
| LAND_OWNERSHIP       | Land ownership type<br><i>Units: see options for LAND_OWNERSHIP in Table S7.</i>                     |
| LOCATION_LAT*        | Latitude of the site<br><i>Units: decimal deg ref WGS84</i>                                          |
| LOCATION_LONG*       | Longitude of the site<br><i>Units: decimal deg ref WGS84</i>                                         |
| LOCATION_ELEV        | Elevation of the site above sea level<br><i>Units: m</i>                                             |
| LOCATION_DATE_START  | Begin date of the location information<br><i>Units: YYYYMMDDHHMM</i>                                 |
| LOCATION_COMMENT     | Location information comments                                                                        |
| MAP                  | Climatological long-term Mean Annual average Precipitation (MAP)<br><i>Units: mm year-1</i>          |
| MAT                  | Climatological long-term Mean Annual average air Temperature (MAT)<br><i>Units: deg C</i>            |
| NETWORK*             | Network affiliation(s) of the site<br><i>Units: see pre-defined options for NETWORK in Table S7.</i> |
| RESEARCH_TOPIC       | Site research topics                                                                                 |
| SITE_NAME*           | Site name                                                                                            |
| SITE_DESC            | Short description of the site characteristics and history                                            |
| SITE_FUNDING         | Site funding agencies/institutions                                                                   |
| SITE_SNOW_COVER_DAYS | Days per year that the site is covered by snow                                                       |

The FLUXNET2015 dataset and the ONEFlux processing pipeline for eddy covariance data  
Supplementary Materials

|                         |                                                                                                                                                                         |
|-------------------------|-------------------------------------------------------------------------------------------------------------------------------------------------------------------------|
|                         | <i>Units: days</i>                                                                                                                                                      |
| SURFACE_HOMOGENEITY     | Distance for which the ecosystem is homogeneous in the prevailing wind direction<br><i>Units: m</i>                                                                     |
| TEAM_MEMBER_NAME*       | Site tower team member name (First/Given Last/Family)                                                                                                                   |
| TEAM_MEMBER_ROLE*       | Site tower team member role<br><i>Units: see options for TEAM_MEMBER_ROLE in Table S7.</i>                                                                              |
| TEAM_MEMBER_EMAIL*      | Site tower team member email                                                                                                                                            |
| TEAM_MEMBER_INSTITUTION | Site tower team member institution                                                                                                                                      |
| TEAM_MEMBER_ADDRESS     | Site tower team member address                                                                                                                                          |
| TERRAIN                 | Slope and/or relief of the site<br><i>Units: see options for TERRAIN in Table S7.</i>                                                                                   |
| TOWER_POWER             | How the eddy covariance system is powered<br><i>Units: see options for TOWER_POWER in Table S7.</i>                                                                     |
| TOWER_TYPE              | Type of physical tower structure where the main, above canopy eddy covariance system is installed for the site<br><i>Units: see options for TOWER_TYPE in Table S7.</i> |
| URL                     | Tower web site URL (maintained by tower team)<br><i>Units: URL</i>                                                                                                      |
| URL_FLUXNET*            | URL of site page on the fluxnet.fluxdata.org<br><i>Units: URL</i>                                                                                                       |
| UTC_OFFSET*             | Offset from UTC of site data<br><i>Units: hours</i>                                                                                                                     |
| UTC_OFFSET_DATE_START   | Begin date of the UTC offset<br><i>Units: YYYYMMDDHHMM</i>                                                                                                              |
| UTC_OFFSET_COMMENT      | Offset from UTC comments                                                                                                                                                |
| WIND_DIRECTION          | Prevailing wind direction<br><i>Units: see options for WIND_DIRECTION in Table S7.</i>                                                                                  |

**Table SM3.** DOI metadata. Variables generated for all sites are marked with an asterisk (\*).

| Variable                    | Description / Units                                                                                                                                                        |
|-----------------------------|----------------------------------------------------------------------------------------------------------------------------------------------------------------------------|
| DOI*                        | DOI for the identified flux-met data product                                                                                                                               |
| DOI_DATAPRODUCT             | Flux-met data product associated with the DOI<br><i>Units: FLUXNET2015</i>                                                                                                 |
| DOI_CONTRIBUTOR_NAME        | Name of person that contributed to the development of the data                                                                                                             |
| DOI_CONTRIBUTOR_EMAIL       | Email of person that contributed to the development of the data                                                                                                            |
| DOI_CONTRIBUTOR_ORCID       | ORCID of person that contributed to the development of the data<br><i>Units: ORCID identifier</i>                                                                          |
| DOI_CONTRIBUTOR_INSTITUTION | Institution of person that contributed to the development of the data                                                                                                      |
| DOI_CONTRIBUTOR_ROLE        | Role of person that contributed to the development of the data. Authors are listed in the DOI citation.<br><i>Units: see options for DOI_CONTRIBUTOR_ROLE in Table S7.</i> |
| DOI_CONTRIBUTOR_ORDINAL     | Listing order in the citation and DOI landing page for this contributor (1 is first)<br><i>Units: integer number</i>                                                       |
| DOI_CONTRIBUTOR_DATE_START  | Start date of data for which the person is a contributor<br><i>Units: YYYYMMDDHHMM</i>                                                                                     |
| DOI_CONTRIBUTOR_DATE_END    | End date of data for which the person is a contributor<br><i>Units: YYYYMMDDHHMM</i>                                                                                       |
| DOI_ORGANIZATION            | Name of the organization to be recognized for contributing to the data                                                                                                     |
| DOI_ORGANIZATION_ROLE       | Role of the organization to be recognized for contributing to the data<br><i>Units: see options for DOI_ORGANIZATION_ROLE in Table S7.</i>                                 |

**Table SM4.** Publications metadata.

| Variable          | Description / Units                                                                          |
|-------------------|----------------------------------------------------------------------------------------------|
| REFERENCE_PAPER   | Papers relevant for understanding the site                                                   |
| REFERENCE_DOI     | DOI of the reference                                                                         |
| REFERENCE_USAGE   | Suggested use of the reference<br><i>Units: see options for REFERENCE_USAGE in Table S7.</i> |
| REFERENCE_COMMENT | Brief description of paper relevance or other comments                                       |

**Table SM5.** Canopy Height metadata. Required variables collected from all sites are marked with an asterisk (\*).

| Variable                                                                                                                                                             | Description / Units                                                                                                                                             |
|----------------------------------------------------------------------------------------------------------------------------------------------------------------------|-----------------------------------------------------------------------------------------------------------------------------------------------------------------|
| HEIGHTC_DATE*                                                                                                                                                        | <b>Canopy height measurement date</b><br>Date is reported at the precision known.<br><i>Units: YYYYMMDDHHMM</i>                                                 |
| HEIGHTC*<br><br><i>Note: In the case of a forest or similar ecosystems, canopy height values reported are representative of the distribution of overstory trees.</i> | <b>Canopy height</b><br>In a forest ecosystem, canopy height is the distribution of overstory trees that see light at the top of the canopy.<br><i>Units: m</i> |



**Table SM6.** Variable Information metadata. Required variables collected from or generated for all sites are marked with an asterisk (\*). For each site, only variables with valid data have a corresponding Variable Information group in the metadata. The earliest VAR\_INFO\_DATE value for each variable is the first date where observations are reported for the variable. As noted before, timestamps might be truncated to the best information available (e.g., for long running sites it might only be known the month when a sensor was installed, not the exact day and time).

| Variable          | Description / Units                                                                                                                  |
|-------------------|--------------------------------------------------------------------------------------------------------------------------------------|
| VAR_INFO_VARNAME* | Variable name including variable qualifiers as needed.<br><i>Units: Variable code. See Table S1.</i>                                 |
| VAR_INFO_UNIT*    | Variable units<br><i>Units: See Table SM1. VAR_INFO_UNIT is reported for the resolution specified in the metadata file name.</i>     |
| VAR_INFO_DATE*    | Variable information start date<br><i>Units: YYYYMMDDHHMM</i>                                                                        |
| VAR_INFO_HEIGHT   | Distance above or below (negative values) the ground surface at which the variable was observed<br><i>Units: m</i>                   |
| VAR_INFO_MODEL    | Instrument model(s) used for the observations reported by the variable.<br><i>Units: see options for VAR_INFO_MODEL in Table S7.</i> |

**Table SM7.**

See

***“The FLUXNET2015 dataset and the ONEFlux processing pipeline for eddy covariance data—Supplementary Materials, Table SM7”***

placed at the end of the document.

**Table SM8.** BADM Interchange Format (BIF) Description and Examples. All FLUXNET2015 metadata are available in files following the BADM Interchange Format (BIF), a machine-readable format for BADM. There are five BIF files distributed with FLUXNET2015 (filename: FLX\_AA-Flx\_BIF\_<RES>\_<RELEASE\_DATE>.xlsx), one for each temporal resolution (<RES>: HH, DD, WW, MM, and YY). The five files follow the same format, and contain the same entries for most variables except for Variable Information metadata (Table S6), which include only variables available for each resolution and resolution specific units (see Table 2 for examples). All these five BIF files are packed in a single zip file (<RES>: ALL). The BIF format consists of five columns: (1) SITE\_ID: the site FLUXNET ID; (2) GROUP\_ID: a numeric identifier that is unique for all rows that should be used together (e.g., a value, the date it was collected, and the method used to collect it); (3) VARIABLE\_GROUP: the label of the variable group, which can be used to separate variables by metadata types (such as those listed in Table 3); (4) VARIABLE: the label of the variable (see Tables S2-S6 for a full list of variables present in the metadata); (6) DATAVALUE: the value/measurement of the variable. Note that sites often report multiple instances of the same variable group associated with different measurements collected with different times, instruments, instrument depths, etc. The GROUP\_ID uniquely identifies the data belonging to the same instance of a reported variable, and can be used to identify separate instances within the BIF file. This table shows an excerpt from the hourly (HH) BIF file for FLUXNET2015. The first three rows (with GROUP\_ID 40066631) show the long wave incoming radiation variable using W m-2 as a unit and the data values for the sensor measuring this variable begin at 200402261100. Similarly, entries with GROUP\_IDs of 40066659 and 40066660 describe the USTAR variable, in this case including the models and heights of the instruments, the first instrument being a SA-Gill R2, with observations starting at 199607051400, later replaced by a SA-Gill R3-50 at 200605230000. Finally, GROUP\_IDs 40066736 and 40066737 show a variable (NEE\_VUT\_REF) which is generated by a combination of two instruments: initially GA\_CP-LI-COR LI-6262 and SA-Gill R2, and after 200605230000 (when the sonic anemometer was replaced), GA\_CP-LI-COR LI-6262 and SA-Gill R3-50.

| SITE_ID | GROUP_ID | VARIABLE_GROUP | VARIABLE         | DATAVALUE    |
|---------|----------|----------------|------------------|--------------|
| [...]   |          |                |                  |              |
| DE-Tha  | 40066631 | GRP_VAR_INFO   | VAR_INFO_VARNAME | LW_IN_F_MDS  |
| DE-Tha  | 40066631 | GRP_VAR_INFO   | VAR_INFO_UNIT    | W m-2        |
| DE-Tha  | 40066631 | GRP_VAR_INFO   | VAR_INFO_DATE    | 200402261100 |
| [...]   |          |                |                  |              |
| DE-Tha  | 40066659 | GRP_VAR_INFO   | VAR_INFO_VARNAME | USTAR        |
| DE-Tha  | 40066659 | GRP_VAR_INFO   | VAR_INFO_HEIGHT  | 42           |
| DE-Tha  | 40066659 | GRP_VAR_INFO   | VAR_INFO_MODEL   | SA-Gill R2   |

The FLUXNET2015 dataset and the ONEFlux processing pipeline for eddy covariance data  
 Supplementary Materials

|        |          |              |                  |                                                   |
|--------|----------|--------------|------------------|---------------------------------------------------|
| DE-Tha | 40066659 | GRP_VAR_INFO | VAR_INFO_UNIT    | m s-1                                             |
| DE-Tha | 40066659 | GRP_VAR_INFO | VAR_INFO_DATE    | 199607051400                                      |
| DE-Tha | 40066660 | GRP_VAR_INFO | VAR_INFO_VARNAME | USTAR                                             |
| DE-Tha | 40066660 | GRP_VAR_INFO | VAR_INFO_HEIGHT  | 42                                                |
| DE-Tha | 40066660 | GRP_VAR_INFO | VAR_INFO_MODEL   | SA-Gill R3-50                                     |
| DE-Tha | 40066660 | GRP_VAR_INFO | VAR_INFO_UNIT    | m s-1                                             |
| DE-Tha | 40066660 | GRP_VAR_INFO | VAR_INFO_DATE    | 200605230000                                      |
| [...]  |          |              |                  |                                                   |
| DE-Tha | 40066736 | GRP_VAR_INFO | VAR_INFO_VARNAME | NEE_VUT_REF                                       |
| DE-Tha | 40066736 | GRP_VAR_INFO | VAR_INFO_HEIGHT  | 42                                                |
| DE-Tha | 40066736 | GRP_VAR_INFO | VAR_INFO_MODEL   | GA_CP-LI-COR<br>LI-6262;SA-Gill R2                |
| DE-Tha | 40066736 | GRP_VAR_INFO | VAR_INFO_UNIT    | $\mu\text{molCO}_2 \text{ m}^{-2} \text{ s}^{-1}$ |
| DE-Tha | 40066736 | GRP_VAR_INFO | VAR_INFO_DATE    | 199601010000                                      |
| DE-Tha | 40066737 | GRP_VAR_INFO | VAR_INFO_VARNAME | NEE_VUT_REF                                       |
| DE-Tha | 40066737 | GRP_VAR_INFO | VAR_INFO_HEIGHT  | 42                                                |
| DE-Tha | 40066737 | GRP_VAR_INFO | VAR_INFO_MODEL   | GA_CP-LI-COR<br>LI-6262;SA-Gill<br>R3-50          |
| DE-Tha | 40066737 | GRP_VAR_INFO | VAR_INFO_UNIT    | $\mu\text{molCO}_2 \text{ m}^{-2} \text{ s}^{-1}$ |
| DE-Tha | 40066737 | GRP_VAR_INFO | VAR_INFO_DATE    | 200605230000                                      |
| [...]  |          |              |                  |                                                   |

**Table SM9.** Co-author list and site affiliation

| Site   | Co-Authors                                                                                                    |
|--------|---------------------------------------------------------------------------------------------------------------|
| AR-SLu | Gabriela Posse; Carlos Marcelo Di Bella; Marcelo Nosetto                                                      |
| AR-Vir | Gabriela Posse; Carlos Marcelo Di Bella; Marcelo Nosetto                                                      |
| AT-Neu | Georg Wohlfahrt; Albin Hammerle                                                                               |
| AU-Ade | Jason Beringer; Lindsay Hutley; Ian McHugh; Matthew Northwood; Nigel Tapper; Caitlin Moore; Jeffrey P. Walker |
| AU-ASM | James Cleverly; Derek Eamus                                                                                   |
| AU-Cpr | Wayne Meyer; Georgia Koerber; Peter Cale                                                                      |
| AU-Cum | Elise Pendall; Victor Resco de Dios                                                                           |
| AU-DaP | Jason Beringer; Lindsay Hutley; Ian McHugh; Matthew Northwood; Nigel Tapper; Caitlin Moore; Jeffrey P. Walker |
| AU-DaS | Jason Beringer; Lindsay Hutley; Ian McHugh; Matthew Northwood; Nigel Tapper; Caitlin Moore; Jeffrey P. Walker |
| AU-Dry | Jason Beringer; Lindsay Hutley; Ian McHugh; Matthew Northwood; Nigel Tapper; Caitlin Moore; Jeffrey P. Walker |
| AU-Emr | Ivan Schroder; Andrew Feitz                                                                                   |
| AU-Fog | Jason Beringer; Lindsay Hutley; Ian McHugh; Matthew Northwood; Nigel Tapper; Caitlin Moore; Jeffrey P. Walker |
| AU-Gin | Richard Silberstein                                                                                           |
| AU-GWW | Craig Macfarlane; Suzanne Prober                                                                              |
| AU-How | Jason Beringer; Lindsay Hutley; Ian McHugh; Matthew Northwood; Nigel Tapper; Caitlin Moore; Jeffrey P. Walker |
| AU-Lox | Cacilia M. Ewenz; Robert M. Stevens                                                                           |
| AU-RDF | Jason Beringer; Lindsay Hutley; Ian McHugh; Matthew Northwood; Nigel Tapper; Caitlin Moore; Jeffrey P. Walker |
| AU-Rig | Jason Beringer; Lindsay Hutley; Ian McHugh; Matthew Northwood; Nigel Tapper; Caitlin Moore; Jeffrey P. Walker |
| AU-Rob | Michael Liddell                                                                                               |
| AU-Stp | Jason Beringer; Lindsay Hutley; Ian McHugh; Matthew Northwood; Nigel Tapper; Caitlin Moore; Jeffrey P. Walker |
| AU-TTE | James Cleverly; Derek Eamus                                                                                   |

The FLUXNET2015 dataset and the ONEFlux processing pipeline for eddy covariance data  
Supplementary Materials

|        |                                                                                                               |
|--------|---------------------------------------------------------------------------------------------------------------|
| AU-Tum | William Woodgate; Eva van Gorsel; Ray Leuning                                                                 |
| AU-Wac | Jason Beringer; Lindsay Hutley; Ian McHugh; Matthew Northwood; Nigel Tapper; Caitlin Moore; Jeffrey P. Walker |
| AU-Whr | Jason Beringer; Lindsay Hutley; Ian McHugh; Matthew Northwood; Nigel Tapper; Caitlin Moore; Jeffrey P. Walker |
| AU-Wom | Stefan K. Arndt; Nina Hinko-Najera; Anne Griebel                                                              |
| AU-Ync | Jason Beringer; Lindsay Hutley; Ian McHugh; Matthew Northwood; Nigel Tapper; Caitlin Moore; Jeffrey P. Walker |
| BE-Bra | Bert Gielen; Nicola Arriga; Marilyn Roland; Johan Neiryndck                                                   |
| BE-Lon | Bernard Heinesch; Christine Moureaux; Anne De Ligne; Caroline Vincke; Marc Aubinet                            |
| BE-Vie | Bernard Heinesch; Christine Moureaux; Anne De Ligne; Caroline Vincke; Marc Aubinet                            |
| BR-Sa1 | Scott R. Saleska; Natalia Restrepo-Coupe; Raimundo C. De Oliveira                                             |
| BR-Sa3 | Michael L. Goulden; Humberto da Rocha                                                                         |
| CA-Gro | Harry McCaughey                                                                                               |
| CA-Man | Brian Amiro; Steve Wofsy; Allison Dunn                                                                        |
| CA-NS1 | Michael L. Goulden; Scott D. Miller; Andrew M. S. McMillan                                                    |
| CA-NS2 | Michael L. Goulden; Scott D. Miller; Andrew M. S. McMillan                                                    |
| CA-NS3 | Michael L. Goulden; Scott D. Miller; Andrew M. S. McMillan                                                    |
| CA-NS4 | Michael L. Goulden; Scott D. Miller; Andrew M. S. McMillan                                                    |
| CA-NS5 | Michael L. Goulden; Scott D. Miller; Andrew M. S. McMillan                                                    |
| CA-NS6 | Michael L. Goulden; Scott D. Miller; Andrew M. S. McMillan                                                    |
| CA-NS7 | Michael L. Goulden; Scott D. Miller; Andrew M. S. McMillan                                                    |
| CA-Oas | Thomas Andrew Black; Rachhpal Jassal; Zoran Nestic; Alan Barr                                                 |
| CA-Obs | Thomas Andrew Black; Rachhpal Jassal; Zoran Nestic; Alan Barr                                                 |
| CA-Qfo | Carole Coursolle; Onil Bergeron; Hank A. Margolis                                                             |
| CA-SF1 | Brian Amiro; Steve Wofsy; Allison Dunn                                                                        |
| CA-SF2 | Brian Amiro; Steve Wofsy; Allison Dunn                                                                        |
| CA-SF3 | Brian Amiro; Steve Wofsy; Allison Dunn                                                                        |
| CA-TP1 | M. Altaf Arain; Jason Brodeur; Natalia Restrepo-Coupe; Matthias Peichl; Myroslava Khomik; Eric Beamesderfer   |
| CA-TP2 | M. Altaf Arain; Jason Brodeur; Natalia Restrepo-Coupe; Matthias Peichl; Myroslava Khomik; Eric Beamesderfer   |
| CA-TP3 | M. Altaf Arain; Jason Brodeur; Natalia Restrepo-Coupe; Matthias Peichl; Myroslava Khomik; Eric Beamesderfer   |

*The FLUXNET2015 dataset and the ONEFlux processing pipeline for eddy covariance data  
Supplementary Materials*

|        |                                                                                                             |
|--------|-------------------------------------------------------------------------------------------------------------|
| CA-TP4 | M. Altaf Arain; Jason Brodeur; Natalia Restrepo-Coupe; Matthias Peichl; Myroslava Khomik; Eric Beamesderfer |
| CA-TPD | M. Altaf Arain; Jason Brodeur; Natalia Restrepo-Coupe; Matthias Peichl; Myroslava Khomik; Eric Beamesderfer |
| CG-Tch | Agnes de Grandcourt; Yann Nouvellon                                                                         |
| CH-Cha | Lukas Hörtnagl; Werner Eugster; Nina Buchmann; Iris Feigenwinter                                            |
| CH-Dav | Lukas Hörtnagl; Werner Eugster; Nina Buchmann; Mana Gharun                                                  |
| CH-Fru | Lukas Hörtnagl; Werner Eugster; Nina Buchmann                                                               |
| CH-Lae | Lukas Hörtnagl; Werner Eugster; Nina Buchmann; Eugenie Paul-Limoges                                         |
| CH-Oe1 | Christof Ammann                                                                                             |
| CH-Oe2 | Lukas Hörtnagl; Werner Eugster; Nina Buchmann; Regine Maier                                                 |
| CN-Cha | Junhui Zhang; Shijie Han                                                                                    |
| CN-Cng | Gang Dong; Shicheng Jiang                                                                                   |
| CN-Dan | Peili Shi; Yongtao He                                                                                       |
| CN-Din | Guoyi Zhou; Yuelin Li                                                                                       |
| CN-Du2 | Shiping Chen; Xingguo Han                                                                                   |
| CN-Du3 | Changliang Shao; Jiquan Chen                                                                                |
| CN-Ha2 | Yingnian Li                                                                                                 |
| CN-HaM | Tomomichi Kato; Yanhong Tang                                                                                |
| CN-Qia | Huimin Wang; Xiaoqin Dai                                                                                    |
| CN-Sw2 | Changliang Shao; Jiquan Chen                                                                                |
| CZ-BK1 | Jiří Dušek; Ladislav Šigut; Marian Pavelka; Dalibor Janouš; Pavel Sedlák                                    |
| CZ-BK2 | Jiří Dušek; Ladislav Šigut; Marian Pavelka; Dalibor Janouš; Pavel Sedlák                                    |
| CZ-wet | Jiří Dušek; Ladislav Šigut; Marian Pavelka; Dalibor Janouš; Pavel Sedlák                                    |
| DE-Akm | Christian Bernhofer; Thomas Grünwald; Uta Moderow; Uwe Eichelmann; Markus Hehn; Heiko Prasse                |
| DE-Geb | Christian Brümmer; Frederik Schrader; Antje Lucas-Moffat                                                    |
| DE-Gri | Christian Bernhofer; Thomas Grünwald; Uta Moderow; Uwe Eichelmann; Markus Hehn; Heiko Prasse                |
| DE-Hai | Olaf Kolle; Werner L Kutsch; Frank Tiedemann; Lukas Siebicke; Alexander Knohl                               |
| DE-Kli | Christian Bernhofer; Thomas Grünwald; Uta Moderow; Uwe Eichelmann; Markus Hehn; Heiko Prasse                |
| DE-Lkb | Rainer Steinbrecher; Hans Peter Schmid; Janina Klatt                                                        |
| DE-Lnf | Olaf Kolle; Werner L Kutsch; Frank Tiedemann; Lukas Siebicke; Alexander Knohl                               |
| DE-Obe | Christian Bernhofer; Thomas Grünwald; Uta Moderow; Uwe Eichelmann; Markus Hehn; Heiko Prasse                |
| DE-RuR | Marius Schmidt; Alexander Graf                                                                              |

*The FLUXNET2015 dataset and the ONEFlux processing pipeline for eddy covariance data  
Supplementary Materials*

|        |                                                                                                                       |
|--------|-----------------------------------------------------------------------------------------------------------------------|
| DE-RuS | Marius Schmidt; Alexander Graf                                                                                        |
| DE-Seh | Karl Schneider; Marius Schmidt                                                                                        |
| DE-SfN | Rainer Steinbrecher; Hans Peter Schmid; Janina Klatt                                                                  |
| DE-Spw | Christian Bernhofer; Thomas Grünwald; Uta Moderow; Uwe Eichelmann; Markus Hehn; Heiko Prasse                          |
| DE-Tha | Christian Bernhofer; Thomas Grünwald; Uta Moderow; Uwe Eichelmann; Markus Hehn; Heiko Prasse                          |
| DE-Zrk | Torsten Sachs; Christian Wille                                                                                        |
| DK-Eng | Andreas Ibrom; Kim Pilegaard                                                                                          |
| DK-Fou | Jørgen Eivind Olesen                                                                                                  |
| DK-Sor | Andreas Ibrom; Kim Pilegaard                                                                                          |
| ES-Amo | Francisco Domingo; Ana López-Ballesteros; Penélope Serrano-Ortiz; Enrique P. Sánchez-Cañete                           |
| ES-LgS | Borja Ruiz; Andrew Kowalsky                                                                                           |
| ES-LJu | Francisco Domingo; Ana López-Ballesteros; Penélope Serrano-Ortiz; Enrique P. Sánchez-Cañete                           |
| ES-Ln2 | Borja Ruiz; Andrew Kowalsky                                                                                           |
| FI-Hyy | Ivan Mammarella; Timo Vesala; Samuli Launiainen; Üllar Rannik                                                         |
| FI-Jok | Aurela Mika; Tuomas Laurila; Annalea Lohila; Juha-Pekka Tuovinen; Juha Hatakka                                        |
| FI-Let | Aurela Mika; Tuomas Laurila; Annalea Lohila; Juha-Pekka Tuovinen; Juha Hatakka                                        |
| FI-Lom | Aurela Mika; Tuomas Laurila; Annalea Lohila; Juha-Pekka Tuovinen; Juha Hatakka                                        |
| FI-Sod | Aurela Mika; Tuomas Laurila; Annalea Lohila; Juha-Pekka Tuovinen; Juha Hatakka                                        |
| FR-Fon | Daniel Berveiller; Eric Dufrêne; Nicolas Delpierre                                                                    |
| FR-Gri | Pauline Buysse; Benjamin Loubet; Pierre Cellier                                                                       |
| FR-LBr | Denis Loustau; Jean-Marc Bonnefond; Virginie Moreaux                                                                  |
| FR-Pue | Jean-Marc Ourcival; Serge Rambal; Jean-Marc Limousin                                                                  |
| GF-Guy | Damien Bonal; Benoit Burban                                                                                           |
| GH-Ank | Riccardo Valentini; Agnes de Grandcourt; Giacomo Nicolini                                                             |
| GL-NuF | Birger Ulf Hansen; Efrén López-Blanco                                                                                 |
| GL-ZaF | Mikhail Mastepanov; Marcin Jackowicz-Korchynski; Torben R. Christensen                                                |
| GL-ZaH | Mikhail Mastepanov; Marcin Jackowicz-Korchynski; Torben R. Christensen                                                |
| IT-BCi | Vincenzo Magliulo; Paul di Tommasi; Daniela Famulari                                                                  |
| IT-CA1 | Simone Sabbatini; Domenico Vitale; Michele Tomassucci; Claudia Consalvo; Nicola Arriga; Dario Papale                  |
| IT-CA2 | Simone Sabbatini; Beniamino Gioli; Domenico Vitale; Michele Tomassucci; Claudia Consalvo; Nicola Arriga; Dario Papale |



The FLUXNET2015 dataset and the ONEFlux processing pipeline for eddy covariance data  
Supplementary Materials

|        |                                                                                                                                                                                                    |
|--------|----------------------------------------------------------------------------------------------------------------------------------------------------------------------------------------------------|
| IT-CA3 | Simone Sabbatini; Domenico Vitale; Michele Tomassucci; Claudia Consalvo; Nicola Arriga; Dario Papale                                                                                               |
| IT-Col | Francesco Mazzenga; Ettore D'Andrea; Bruno De Cinti; Alessio Collalti; Giovanni Manca; Riccardo Valentini                                                                                          |
| IT-Cp2 | Silvano Fares                                                                                                                                                                                      |
| IT-Cpz | Simone Sabbatini; Domenico Vitale; Michele Tomassucci; Sabina Dore; Riccardo Valentini; Dario Papale; Francesco Mazzenga                                                                           |
| IT-Isp | Ignacio Goded; Carsten Gruening                                                                                                                                                                    |
| IT-La2 | Damiano Gianelle; Isaac Chini; Barbara Marcolla; Roberto Zampedri; Mauro Cavagna                                                                                                                   |
| IT-Lav | Damiano Gianelle; Isaac Chini; Barbara Marcolla; Roberto Zampedri; Mauro Cavagna                                                                                                                   |
| IT-MBo | Damiano Gianelle; Isaac Chini; Barbara Marcolla; Roberto Zampedri; Mauro Cavagna                                                                                                                   |
| IT-Noe | Donatella Spano; Pierpaolo Duce; Costantino Sirca; Serena Marras                                                                                                                                   |
| IT-PT1 | Giovanni Manca; Ignacio Goded; Carsten Gruening                                                                                                                                                    |
| IT-Ren | Leonardo Montagnani; Stefano Minerbi                                                                                                                                                               |
| IT-Ro1 | Simone Sabbatini; Domenico Vitale; Michele Tomassucci; Claudia Consalvo; Sabina Dore; Luca Belelli Marchesini; Nicola Arriga; Giovanni Manca; Riccardo Valentini; Dario Papale; Francesco Mazzenga |
| IT-Ro2 | Simone Sabbatini; Domenico Vitale; Michele Tomassucci; Claudia Consalvo; Sabina Dore; Luca Belelli Marchesini; Nicola Arriga; Giovanni Manca; Riccardo Valentini; Dario Papale; Francesco Mazzenga |
| IT-SR2 | Ignacio Goded; Carsten Gruening                                                                                                                                                                    |
| IT-SRo | Giovanni Manca; Ignacio Goded; Carsten Gruening                                                                                                                                                    |
| IT-Tor | Edoardo Cremonese; Marta Galvagno; Gianluca Filippa                                                                                                                                                |
| JP-MBF | Ayumi Kotani; Taro Nakai                                                                                                                                                                           |
| JP-SMF | Ayumi Kotani; Taro Nakai                                                                                                                                                                           |
| MY-PSO | Satoru Takanashi; Yoshiko Kosugi; Marryanna Lion                                                                                                                                                   |
| NL-Hor | Luca Belelli Marchesini; Han Dolman; Ko van Huissteden                                                                                                                                             |
| NL-Loo | Eddy Moors; Wilma Jans; Michiel van der Molen; Bart Kruijt                                                                                                                                         |
| PA-SPn | Sebastian Wolf; Werner Eugster                                                                                                                                                                     |
| PA-SPs | Sebastian Wolf; Werner Eugster                                                                                                                                                                     |
| RU-Che | Mathias Goeckede; Lutz Merbold                                                                                                                                                                     |
| RU-Cok | Luca Belelli Marchesini; Han Dolman; Ko van Huissteden                                                                                                                                             |
| RU-Fyo | Natalia Vygodskaya; Ivan Shironya; Julia Kurbatova; Andrej Varlagin                                                                                                                                |
| RU-Ha1 | Luca Belelli Marchesini; Dario Papale; Riccardo Valentini                                                                                                                                          |

*The FLUXNET2015 dataset and the ONEFlux processing pipeline for eddy covariance data  
Supplementary Materials*

|        |                                                                                                     |
|--------|-----------------------------------------------------------------------------------------------------|
| SD-Dem | Jonas Ardö; Hatim Abdalla M. ElKhidir                                                               |
| SJ-Adv | Frans-Jan Parmentier; Norbert Pirk                                                                  |
| SJ-Blv | Julia Boike; Sebastian Westermann; Johannes Lüers                                                   |
| SN-Dhr | Torbern Tagesson; Rasmus Fensholt                                                                   |
| US-AR1 | Margaret Torn; Dave Billesbach; Naama Raz-Yaseef                                                    |
| US-AR2 | Margaret Torn; Dave Billesbach; Naama Raz-Yaseef                                                    |
| US-ARb | Margaret Torn; Dave Billesbach; Naama Raz-Yaseef                                                    |
| US-ARc | Margaret Torn; Dave Billesbach; Naama Raz-Yaseef                                                    |
| US-ARM | Sebastien Biraud; Marc Fischer; Margaret Torn                                                       |
| US-Atq | Donatella Zona; Oechel Walter                                                                       |
| US-Blo | Allen H Goldstein; Silvano Fares; Robin Weber                                                       |
| US-Cop | David Bowling                                                                                       |
| US-CRT | Jiquan Chen; Asko Noormets; Housen Chu                                                              |
| US-GBT | William Massman; John Frank                                                                         |
| US-GLE | William Massman; John Frank                                                                         |
| US-Goo | Tilden Meyers                                                                                       |
| US-Ha1 | J William Munger; Michael L. Goulden; Shawn Urbanski; Steven Wofsy                                  |
| US-IB2 | Roser Matamala; David Cook                                                                          |
| US-Ivo | Donatella Zona; Oechel Walter                                                                       |
| US-KS1 | Powell Thomas; Bracho Rosvel                                                                        |
| US-KS2 | Powell Thomas; Bracho Rosvel                                                                        |
| US-Lin | Allen H Goldstein; Silvano Fares; Robin Weber                                                       |
| US-Los | Ankur R. Desai; Kenneth J. Davis; Paul V. Bolstad; Bruce D. Cook; Jonathan Thom                     |
| US-LWW | Tilden Meyers                                                                                       |
| US-Me1 | Bev Law; Hyojung Kwon; Chad Hanson                                                                  |
| US-Me2 | Bev Law; Hyojung Kwon; Chad Hanson                                                                  |
| US-Me3 | Bev Law; Hyojung Kwon; Chad Hanson                                                                  |
| US-Me4 | Bev Law; Hyojung Kwon; Chad Hanson                                                                  |
| US-Me5 | Bev Law; Hyojung Kwon; Chad Hanson                                                                  |
| US-Me6 | Bev Law; Hyojung Kwon; Chad Hanson                                                                  |
| US-MMS | Kimberly Novick; Richard Phillips                                                                   |
| US-Myb | Siyun Ma; Jaclyn Hatala Matthes; Sara Knox; Cove Sturtevant; Joseph Verfaillie;<br>Dennis Baldocchi |
| US-Ne1 | Andy Suyker; Timothy Arkebauer; Elizabeth Walter-Shea; Adam Liska; Anatoly<br>Gitelson              |
| US-Ne2 | Andy Suyker; Timothy Arkebauer; Elizabeth Walter-Shea; Adam Liska; Anatoly<br>Gitelson              |

*The FLUXNET2015 dataset and the ONEFlux processing pipeline for eddy covariance data  
Supplementary Materials*

|        |                                                                                                   |
|--------|---------------------------------------------------------------------------------------------------|
| US-Ne3 | Andy Suyker; Timothy Arkebauer; Elizabeth Walter-Shea; Adam Liska; Anatoly Gitelson               |
| US-NR1 | Peter D. Blanken; Russell K. Monson; Sean P. Burns; David R. Bowling                              |
| US-Oho | Jiquan Chen; Asko Noormets; Housen Chu                                                            |
| US-ORv | Gil Bohrer                                                                                        |
| US-PFa | Ankur R. Desai; Kenneth J. Davis; Paul V. Bolstad; Bruce D. Cook; Jonathan Thom; Arlyn E. Andrews |
| US-Prr | Hiroki Ikawa; Hideki Kobayashi                                                                    |
| US-SRC | Shirley A. Papuga; Zulia M. Sanchez-Mejia                                                         |
| US-SRG | Russell L. Scott                                                                                  |
| US-SRM | Russell L. Scott                                                                                  |
| US-Sta | Brent Ewers; David Reed                                                                           |
| US-Syv | Ankur R. Desai; Kenneth J. Davis; Paul V. Bolstad; Bruce D. Cook; Jonathan Thom                   |
| US-Ton | Siyan Ma; Jaclyn Hatala Matthes; Sara Knox; Cove Sturtevant; Joseph Verfaillie; Dennis Baldocchi  |
| US-Tw1 | Siyan Ma; Jaclyn Hatala Matthes; Sara Knox; Cove Sturtevant; Joseph Verfaillie; Dennis Baldocchi  |
| US-Tw2 | Siyan Ma; Jaclyn Hatala Matthes; Sara Knox; Cove Sturtevant; Joseph Verfaillie; Dennis Baldocchi  |
| US-Tw3 | Siyan Ma; Jaclyn Hatala Matthes; Sara Knox; Cove Sturtevant; Joseph Verfaillie; Dennis Baldocchi  |
| US-Tw4 | Siyan Ma; Jaclyn Hatala Matthes; Sara Knox; Cove Sturtevant; Joseph Verfaillie; Dennis Baldocchi  |
| US-Twt | Siyan Ma; Jaclyn Hatala Matthes; Sara Knox; Cove Sturtevant; Joseph Verfaillie; Dennis Baldocchi  |
| US-UMB | Gil Bohrer; Christopher M. Gough; Peter S. Curtis                                                 |
| US-UMd | Gil Bohrer; Christopher M. Gough; Peter S. Curtis                                                 |
| US-Var | Siyan Ma; Jaclyn Hatala Matthes; Sara Knox; Cove Sturtevant; Joseph Verfaillie; Dennis Baldocchi  |
| US-WCr | Ankur R. Desai; Kenneth J. Davis; Paul V. Bolstad; Bruce D. Cook; Jonathan Thom                   |
| US-Whs | Russell L. Scott                                                                                  |
| US-Wi0 | Jiquan Chen; Asko Noormets; Housen Chu                                                            |
| US-Wi1 | Jiquan Chen; Asko Noormets; Housen Chu                                                            |
| US-Wi2 | Jiquan Chen; Asko Noormets; Housen Chu                                                            |
| US-Wi3 | Jiquan Chen; Asko Noormets; Housen Chu                                                            |
| US-Wi4 | Jiquan Chen; Asko Noormets; Housen Chu                                                            |
| US-Wi5 | Jiquan Chen; Asko Noormets; Housen Chu                                                            |

*The FLUXNET2015 dataset and the ONEFlux processing pipeline for eddy covariance data*  
*Supplementary Materials*

|        |                                        |
|--------|----------------------------------------|
| US-Wi6 | Jiquan Chen; Asko Noormets; Housen Chu |
| US-Wi7 | Jiquan Chen; Asko Noormets; Housen Chu |
| US-Wi8 | Jiquan Chen; Asko Noormets; Housen Chu |
| US-Wi9 | Jiquan Chen; Asko Noormets; Housen Chu |
| US-Wkg | Russell L. Scott                       |
| US-WPT | Jiquan Chen; Asko Noormets; Housen Chu |
| ZM-Mon | Werner L Kutsch; Lutz Merbold          |

**Table SM1.** Complete variables list for FLUXNET2015 dataset

| Variable              | Units          | Description                                                                                                     |
|-----------------------|----------------|-----------------------------------------------------------------------------------------------------------------|
| <b>TIMEKEEPING</b>    |                |                                                                                                                 |
| TIMESTAMP             | YYYYMMDDHHMM   | ISO timestamp - short format                                                                                    |
| TIMESTAMP_START       | YYYYMMDDHHMM   | ISO timestamp start of averaging period - short format                                                          |
| TIMESTAMP_END         | YYYYMMDDHHMM   | ISO timestamp end of averaging period - short format                                                            |
| <b>METEOROLOGICAL</b> |                |                                                                                                                 |
| TA_F_MDS              |                | Air temperature, gapfilled using MDS method                                                                     |
| HH                    | deg C          |                                                                                                                 |
| DD                    | deg C          | average from half-hourly data                                                                                   |
| WW-YY                 | deg C          | average from daily data                                                                                         |
| TA_F_MDS_QC           |                | Quality flag for TA_F_MDS                                                                                       |
| HH                    | nondimensional | 0 = measured; 1 = good quality gapfill; 2 = medium; 3 = poor                                                    |
| DD                    | nondimensional | fraction between 0-1, indicating percentage of measured and good quality gapfill data                           |
| WW-YY                 | nondimensional | fraction between 0-1, indicating percentage of measured and good quality gapfill data (average from daily data) |
| TA_F_MDS_NIGHT        |                | Average nighttime TA_F_MDS                                                                                      |
| HH                    |                | not available                                                                                                   |
| DD                    | deg C          | average from half-hourly data                                                                                   |
| WW-YY                 | deg C          | average from daily data                                                                                         |
| TA_F_MDS_NIGHT_SD     |                | Standard deviation for TA_F_MDS_NIGHT                                                                           |
| HH                    |                | not available                                                                                                   |
| DD                    | deg C          | from half-hourly data                                                                                           |
| WW-YY                 | deg C          | average SD from daily data                                                                                      |
| TA_F_MDS_NIGHT_QC     |                | Quality flag for TA_F_MDS_NIGHT                                                                                 |
| HH                    |                | not available                                                                                                   |
| DD                    | nondimensional | fraction between 0-1, indicating percentage of measured and good quality gapfill data                           |

The FLUXNET2015 dataset and the ONEFlux processing pipeline for eddy covariance data  
 Supplementary Materials, Table SM1

|                 |       |                |                                                                                                                 |
|-----------------|-------|----------------|-----------------------------------------------------------------------------------------------------------------|
|                 | WW-YY | nondimensional | fraction between 0-1, indicating percentage of measured and good quality gapfill data (average from daily data) |
| TA_F_MDS_DAY    |       |                | Average daytime TA_F_MDS                                                                                        |
|                 | HH    |                | not available                                                                                                   |
|                 | DD    | deg C          | average from half-hourly data                                                                                   |
|                 | WW-YY | deg C          | average from daily data                                                                                         |
| TA_F_MDS_DAY_SD |       |                | Standard deviation for TA_F_MDS_DAY                                                                             |
|                 | HH    |                | not available                                                                                                   |
|                 | DD    | deg C          | from half-hourly data                                                                                           |
|                 | WW-YY | deg C          | average SD from daily data                                                                                      |
| TA_F_MDS_DAY_QC |       |                | Quality flag for TA_F_MDS_DAY                                                                                   |
|                 | HH    |                | not available                                                                                                   |
|                 | DD    | nondimensional | fraction between 0-1, indicating percentage of measured and good quality gapfill data                           |
|                 | WW-YY | nondimensional | fraction between 0-1, indicating percentage of measured and good quality gapfill data (average from daily data) |
| TA_ERA          |       |                | Air temperature, downscaled from ERA, linearly regressed using measured only site data                          |
|                 | HH    | deg C          |                                                                                                                 |
|                 | DD    | deg C          | average from half-hourly data                                                                                   |
|                 | WW-YY | deg C          | average from daily data                                                                                         |
| TA_ERA_NIGHT    |       |                | Average nighttime TA_ERA                                                                                        |
|                 | HH    |                | not available                                                                                                   |
|                 | DD    | deg C          | average from half-hourly data                                                                                   |
|                 | WW-YY | deg C          | average from daily data                                                                                         |
| TA_ERA_NIGHT_SD |       |                | Standard deviation for TA_ERA_NIGHT                                                                             |
|                 | HH    |                | not available                                                                                                   |
|                 | DD    | deg C          | from half-hourly data                                                                                           |
|                 | WW-YY | deg C          | average SD from daily data                                                                                      |
| TA_ERA_DAY      |       |                | Average daytime TA_ERA                                                                                          |
|                 | HH    |                | not available                                                                                                   |
|                 | DD    | deg C          | average from half-hourly data                                                                                   |
|                 | WW-YY | deg C          | average from daily data                                                                                         |

The FLUXNET2015 dataset and the ONEFlux processing pipeline for eddy covariance data  
 Supplementary Materials, Table SM1

|               |                |                                                                                                                 |
|---------------|----------------|-----------------------------------------------------------------------------------------------------------------|
| TA_ERA_DAY_SD |                | Standard deviation for TA_ERA_DAY                                                                               |
| HH            |                | not available                                                                                                   |
| DD            | deg C          | from half-hourly data                                                                                           |
| WW-YY         | deg C          | average SD from daily data                                                                                      |
| TA_F          |                | Air temperature, consolidated from TA_F_MDS and TA_ERA                                                          |
| HH            | deg C          | TA_F_MDS used if TA_F_MDS_QC is 0 or 1                                                                          |
| DD            | deg C          | average from half-hourly data                                                                                   |
| WW-YY         | deg C          | average from daily data                                                                                         |
| TA_F_QC       |                | Quality flag for TA_F                                                                                           |
| HH            | nondimensional | 0 = measured; 1 = good quality gapfill; 2 = downscaled from ERA                                                 |
| DD            | nondimensional | fraction between 0-1, indicating percentage of measured and good quality gapfill data                           |
| WW-YY         | nondimensional | fraction between 0-1, indicating percentage of measured and good quality gapfill data (average from daily data) |
| TA_F_NIGHT    |                | Average nighttime TA_F                                                                                          |
| HH            |                | not available                                                                                                   |
| DD            | deg C          | average from half-hourly data                                                                                   |
| WW-YY         | deg C          | average from daily data                                                                                         |
| TA_F_NIGHT_SD |                | Standard deviation for TA_F_NIGHT                                                                               |
| HH            |                | not available                                                                                                   |
| DD            | deg C          | from half-hourly data                                                                                           |
| WW-YY         | deg C          | average SD from daily data                                                                                      |
| TA_F_NIGHT_QC |                | Quality flag for TA_F_NIGHT                                                                                     |
| HH            |                | not available                                                                                                   |
| DD            | nondimensional | fraction between 0-1, indicating percentage of measured and good quality gapfill data                           |
| WW-YY         | nondimensional | fraction between 0-1, indicating percentage of measured and good quality gapfill data (average from daily data) |
| TA_F_DAY      |                | Average daytime TA_F                                                                                            |
| HH            |                | not available                                                                                                   |
| DD            | deg C          | average from half-hourly data                                                                                   |
| WW-YY         | deg C          | average from daily data                                                                                         |

The FLUXNET2015 dataset and the ONEFlux processing pipeline for eddy covariance data  
 Supplementary Materials, Table SM1

|                |                |                                                                                                                                    |
|----------------|----------------|------------------------------------------------------------------------------------------------------------------------------------|
| TA_F_DAY_SD    |                | Standard deviation for TA_F_DAY                                                                                                    |
| HH             |                | not available                                                                                                                      |
| DD             | deg C          | from half-hourly data                                                                                                              |
| WW-YY          | deg C          | average SD from daily data                                                                                                         |
| TA_F_DAY_QC    |                | Quality flag for TA_F_DAY                                                                                                          |
| HH             |                | not available                                                                                                                      |
| DD             | nondimensional | fraction between 0-1, indicating percentage of measured and good quality gapfill data                                              |
| WW-YY          | nondimensional | fraction between 0-1, indicating percentage of measured and good quality gapfill data (average from daily data)                    |
| SW_IN_POT      |                | Shortwave radiation, incoming, potential (top of atmosphere)                                                                       |
| HH             | W m-2          |                                                                                                                                    |
| DD             | W m-2          | average from half-hourly data                                                                                                      |
| WW-MM          | W m-2          | average from daily data                                                                                                            |
| YY             |                | not available                                                                                                                      |
| SW_IN_F_MDS    |                | Shortwave radiation, incoming, gapfilled using MDS (negative values set to zero, e.g., negative values from instrumentation noise) |
| HH             | W m-2          |                                                                                                                                    |
| DD             | W m-2          | average from half-hourly data                                                                                                      |
| WW-YY          | W m-2          | average from daily data                                                                                                            |
| SW_IN_F_MDS_QC |                | Quality flag for SW_IN_F_MDS                                                                                                       |
| HH             | nondimensional | 0 = measured; 1 = good quality gapfill; 2 = medium; 3 = poor                                                                       |
| DD             | nondimensional | fraction between 0-1, indicating percentage of measured and good quality gapfill data                                              |
| WW-YY          | nondimensional | fraction between 0-1, indicating percentage of measured and good quality gapfill data (average from daily data)                    |
| SW_IN_ERA      |                | Shortwave radiation, incoming, downscaled from ERA, linearly regressed using measured only site data (negative values set to zero) |
| HH             | W m-2          |                                                                                                                                    |
| DD             | W m-2          | average from half-hourly data                                                                                                      |



The FLUXNET2015 dataset and the ONEFlux processing pipeline for eddy covariance data  
 Supplementary Materials, Table SM1

|                |       |                |                                                                                                                 |
|----------------|-------|----------------|-----------------------------------------------------------------------------------------------------------------|
|                | WW-YY | W m-2          | average from daily data                                                                                         |
| SW_IN_F        |       |                | Shortwave radiation, incoming consolidated from SW_IN_F_MDS and SW_IN_ERA (negative values set to zero)         |
|                | HH    | W m-2          | SW_IN_F_MDS used if SW_IN_F_MDS_QC is 0 or 1                                                                    |
|                | DD    | W m-2          | average from half-hourly data                                                                                   |
|                | WW-YY | W m-2          | average from daily data                                                                                         |
| SW_IN_F_QC     |       |                | Quality flag for SW_IN_F                                                                                        |
|                | HH    | nondimensional | 0 = measured; 1 = good quality gapfill; 2 = downscaled from ERA                                                 |
|                | DD    | nondimensional | fraction between 0-1, indicating percentage of measured and good quality gapfill data                           |
|                | WW-YY | nondimensional | fraction between 0-1, indicating percentage of measured and good quality gapfill data (average from daily data) |
| LW_IN_F_MDS    |       |                | Longwave radiation, incoming, gapfilled using MDS                                                               |
|                | HH    | W m-2          |                                                                                                                 |
|                | DD    | W m-2          | average from half-hourly data                                                                                   |
|                | WW-YY | W m-2          | average from daily data                                                                                         |
| LW_IN_F_MDS_QC |       |                | Quality flag for LW_IN_F_MDS                                                                                    |
|                | HH    | nondimensional | 0 = measured; 1 = good quality gapfill; 2 = medium; 3 = poor                                                    |
|                | DD    | nondimensional | fraction between 0-1, indicating percentage of measured and good quality gapfill data                           |
|                | WW-YY | nondimensional | fraction between 0-1, indicating percentage of measured and good quality gapfill data (average from daily data) |
| LW_IN_ERA      |       |                | Longwave radiation, incoming, downscaled from ERA, linearly regressed using measured only site data             |
|                | HH    | W m-2          |                                                                                                                 |
|                | DD    | W m-2          | average from half-hourly data                                                                                   |
|                | WW-YY | W m-2          | average from daily data                                                                                         |
| LW_IN_F        |       |                | Longwave radiation, incoming, consolidated from LW_IN_F_MDS and LW_IN_ERA                                       |

The FLUXNET2015 dataset and the ONEFlux processing pipeline for eddy covariance data  
 Supplementary Materials, Table SM1

|               |       |                |                                                                                                                                                        |
|---------------|-------|----------------|--------------------------------------------------------------------------------------------------------------------------------------------------------|
|               | HH    | W m-2          | LW_IN_F_MDS used if LW_IN_F_MDS_QC is 0 or 1                                                                                                           |
|               | DD    | W m-2          | average from half-hourly data                                                                                                                          |
|               | WW-YY | W m-2          | average from daily data                                                                                                                                |
| LW_IN_F_QC    |       |                | Quality flag for LW_IN_F                                                                                                                               |
|               | HH    | nondimensional | 0 = measured; 1 = good quality gapfill; 2 = downscaled from ERA                                                                                        |
|               | DD    | nondimensional | fraction between 0-1, indicating percentage of measured and good quality gapfill data                                                                  |
|               | WW-YY | nondimensional | fraction between 0-1, indicating percentage of measured and good quality gapfill data (average from daily data)                                        |
| LW_IN_JSB     |       |                | Longwave radiation, incoming, calculated from TA_F_MDS, SW_IN_F_MDS, VPD_F_MDS and SW_IN_POT using the JSBACH algorithm (Sonke Zaehle)                 |
|               | HH    | W m-2          |                                                                                                                                                        |
|               | DD    | W m-2          | average from half-hourly data                                                                                                                          |
|               | WW-YY | W m-2          | average from daily data                                                                                                                                |
| LW_IN_JSB_QC  |       |                | Quality flag for LW_IN_JSB                                                                                                                             |
|               | HH    | nondimensional | highest from TA_F_MDS_QC, SW_IN_F_MDS_QC, and VPD_F_MDS_QC, poorest quality prevails                                                                   |
|               | DD    | nondimensional | fraction between 0-1, indicating percentage of calculated LW_IN starting from measured and good quality gapfill drivers data                           |
|               | WW-YY | nondimensional | fraction between 0-1, indicating percentage of calculated LW_IN starting from measured and good quality gapfill drivers data (average from daily data) |
| LW_IN_JSB_ERA |       |                | Longwave radiation, incoming, downscaled from ERA, linearly regressed using site level LW_IN_JSB calculated from measured only drivers                 |
|               | HH    | W m-2          |                                                                                                                                                        |
|               | DD    | W m-2          | average from half-hourly data                                                                                                                          |
|               | WW-YY | W m-2          | average from daily data                                                                                                                                |
| LW_IN_JSB_F   |       |                | Longwave radiation, incoming, consolidated from LW_IN_JSB and LW_IN_JSB_ERA                                                                            |

The FLUXNET2015 dataset and the ONEFlux processing pipeline for eddy covariance data  
 Supplementary Materials, Table SM1

|                |       |                   |                                                                                                                  |
|----------------|-------|-------------------|------------------------------------------------------------------------------------------------------------------|
|                | HH    | W m <sup>-2</sup> | LW_IN_JSB used if LW_IN_JSB_QC is 0 or 1                                                                         |
|                | DD    | W m <sup>-2</sup> | average from half-hourly data                                                                                    |
|                | WW-YY | W m <sup>-2</sup> | average from daily data                                                                                          |
| LW_IN_JSB_F_QC |       |                   | Quality flag for LW_IN_JSB_F                                                                                     |
|                | HH    | nondimensional    | 0 = calculated from measured drivers; 1 = calculated from good quality gapfilled drivers; 2: downscaled from ERA |
|                | DD    | nondimensional    | fraction between 0-1, indicating percentage of measured and good quality gapfill data                            |
|                | WW-YY | nondimensional    | fraction between 0-1, indicating percentage of measured and good quality gapfill data (average from daily data)  |
| VPD_F_MDS      |       |                   | Vapor Pressure Deficit, gapfilled using MDS                                                                      |
|                | HH    | hPa               |                                                                                                                  |
|                | DD    | hPa               | average from half-hourly data                                                                                    |
|                | WW-YY | hPa               | average from daily data                                                                                          |
| VPD_F_MDS_QC   |       |                   | Quality flag for VPD_F_MDS                                                                                       |
|                | HH    | nondimensional    | 0 = measured; 1 = good quality gapfill; 2 = medium; 3 = poor                                                     |
|                | DD    | nondimensional    | fraction between 0-1, indicating percentage of measured and good quality gapfill data                            |
|                | WW-YY | nondimensional    | fraction between 0-1, indicating percentage of measured and good quality gapfill data (average from daily data)  |
| VPD_ERA        |       |                   | Vapor Pressure Deficit, downscaled from ERA, linearly regressed using measured only site data                    |
|                | HH    | hPa               |                                                                                                                  |
|                | DD    | hPa               | average from half-hourly data                                                                                    |
|                | WW-YY | hPa               | average from daily data                                                                                          |
| VPD_F          |       |                   | Vapor Pressure Deficit consolidated from VPD_F_MDS and VPD_ERA                                                   |
|                | HH    | hPa               | VPD_F_MDS used if VPD_F_MDS_QC is 0 or 1                                                                         |
|                | DD    | hPa               | average from half-hourly data                                                                                    |
|                | WW-YY | hPa               | average from daily data                                                                                          |
| VPD_F_QC       |       |                   | Quality flag for VPD_F                                                                                           |

The FLUXNET2015 dataset and the ONEFlux processing pipeline for eddy covariance data  
 Supplementary Materials, Table SM1

|         |       |                |                                                                                                                 |
|---------|-------|----------------|-----------------------------------------------------------------------------------------------------------------|
|         | HH    | nondimensional | 0 = measured; 1 = good quality gapfill; 2 = downscaled from ERA                                                 |
|         | DD    | nondimensional | fraction between 0-1, indicating percentage of measured and good quality gapfill data                           |
|         | WW-YY | nondimensional | fraction between 0-1, indicating percentage of measured and good quality gapfill data (average from daily data) |
| PA      |       |                | Atmospheric pressure                                                                                            |
|         | HH    | kPa            |                                                                                                                 |
|         | DD-YY |                | not available                                                                                                   |
| PA_ERA  |       |                | Atmospheric pressure, downscaled from ERA, linearly regressed using measured only site data                     |
|         | HH    | kPa            |                                                                                                                 |
|         | DD    | kPa            | average from half-hourly data                                                                                   |
|         | WW-YY | kPa            | average from daily data                                                                                         |
| PA_F    |       |                | Atmospheric pressure consolidated from PA and PA_ERA                                                            |
|         | HH    | kPa            | PA used if measured                                                                                             |
|         | DD    | kPa            | average from half-hourly data                                                                                   |
|         | WW-YY | kPa            | average from daily data                                                                                         |
| PA_F_QC |       |                | Quality flag for PA_F                                                                                           |
|         | HH    | nondimensional | 0 = measured; 2 = downscaled from ERA                                                                           |
|         | DD    | nondimensional | fraction between 0-1, indicating percentage of measured data                                                    |
|         | WW-YY | nondimensional | fraction between 0-1, indicating percentage of measured data (average from daily data)                          |
| P       |       |                | Precipitation                                                                                                   |
|         | HH    | mm             |                                                                                                                 |
|         | DD-YY |                | not available                                                                                                   |
| P_ERA   |       |                | Precipitation, downscaled from ERA, linearly regressed using measured only site data                            |
|         | HH    | mm             | (mm per dataset resolution: either hour or half-hour)                                                           |
|         | DD    | mm d-1         | sum from half-hourly data (mm per day)                                                                          |
|         | WW-MM | mm d-1         | average from daily data (mm per day)                                                                            |
|         | YY    | mm y-1         | sum from daily data (mm per year)                                                                               |

The FLUXNET2015 dataset and the ONEFlux processing pipeline for eddy covariance data  
 Supplementary Materials, Table SM1

|         |       |                                                                                                          |
|---------|-------|----------------------------------------------------------------------------------------------------------|
| P_F     |       | Precipitation consolidated from P and P_ERA                                                              |
|         | HH    | mm<br>P used if measured (mm per dataset resolution: either hour or half-hour)                           |
|         | DD    | mm d-1<br>sum from half-hourly data (mm per day)                                                         |
|         | WW-MM | mm d-1<br>average from daily data (mm per day)                                                           |
|         | YY    | mm y-1<br>sum from daily data (mm per year)                                                              |
| P_F_QC  |       | Quality flag for P_F                                                                                     |
|         | HH    | nondimensional<br>0 = measured; 2 = downscaled from ERA                                                  |
|         | DD    | nondimensional<br>fraction between 0-1, indicating percentage of measured data                           |
|         | WW-YY | nondimensional<br>fraction between 0-1, indicating percentage of measured data (average from daily data) |
| WS      |       | Wind speed                                                                                               |
|         | HH    | m s-1                                                                                                    |
|         | DD-YY | not available                                                                                            |
| WS_ERA  |       | Wind speed, downscaled from ERA, linearly regressed using measured only site data                        |
|         | HH    | m s-1                                                                                                    |
|         | DD    | m s-1<br>average from half-hourly data                                                                   |
|         | WW-YY | m s-1<br>average from daily data                                                                         |
| WS_F    |       | Wind speed, consolidated from WS and WS_ERA                                                              |
|         | HH    | m s-1<br>WS used if measured                                                                             |
|         | DD    | m s-1<br>average from half-hourly data                                                                   |
|         | WW-YY | m s-1<br>average from daily data                                                                         |
| WS_F_QC |       | Quality flag of WS_F                                                                                     |
|         | HH    | nondimensional<br>0 = measured; 2 = downscaled from ERA                                                  |
|         | DD    | nondimensional<br>fraction between 0-1, indicating percentage of measured data                           |
|         | WW-YY | nondimensional<br>fraction between 0-1, indicating percentage of measured data (average from daily data) |
| WD      |       | Wind direction                                                                                           |
|         | HH    | Decimal degrees                                                                                          |
|         | DD-YY | not available                                                                                            |
| RH      |       | Relative humidity, range 0-100                                                                           |

The FLUXNET2015 dataset and the ONEFlux processing pipeline for eddy covariance data  
 Supplementary Materials, Table SM1

|            |       |                                            |                                                                                         |
|------------|-------|--------------------------------------------|-----------------------------------------------------------------------------------------|
|            | HH    | %                                          |                                                                                         |
|            | DD-YY |                                            | not available                                                                           |
| USTAR      |       |                                            | Friction velocity                                                                       |
|            | HH    | m s <sup>-1</sup>                          |                                                                                         |
|            | DD    | m s <sup>-1</sup>                          | average from half-hourly data (only days with more than 50% records available)          |
|            | WW-YY | m s <sup>-1</sup>                          | average from daily data (only periods with more than 50% records available)             |
| USTAR_QC   |       |                                            | Quality flag of USTAR                                                                   |
|            | HH    |                                            | not available                                                                           |
|            | DD    | nondimensional                             | fraction between 0-1, indicating percentage of data available (measured)                |
|            | WW-YY | nondimensional                             | fraction between 0-1, indicating percentage of data available (average from daily data) |
| NETRAD     |       |                                            | Net radiation                                                                           |
|            | HH    | W m <sup>-2</sup>                          |                                                                                         |
|            | DD    | W m <sup>-2</sup>                          | average from half-hourly data (only days with more than 50% records available)          |
|            | WW-YY | W m <sup>-2</sup>                          | average from daily data (only periods with more than 50% records available)             |
| NETRAD_QC  |       |                                            | Quality flag of NETRAD                                                                  |
|            | HH    |                                            | not available                                                                           |
|            | DD    | nondimensional                             | fraction between 0-1, indicating percentage of data available (measured)                |
|            | WW-YY | nondimensional                             | fraction between 0-1, indicating percentage of data available (average from daily data) |
| PPFD_IN    |       |                                            | Photosynthetic photon flux density, incoming                                            |
|            | HH    | μmolPhoton m <sup>-2</sup> s <sup>-1</sup> |                                                                                         |
|            | DD    | μmolPhoton m <sup>-2</sup> s <sup>-1</sup> | average from half-hourly data (only days with more than 50% records available)          |
|            | WW-YY | μmolPhoton m <sup>-2</sup> s <sup>-1</sup> | average from daily data (only periods with more than 50% records available)             |
| PPFD_IN_QC |       |                                            | Quality flag of PPFD_IN                                                                 |
|            | HH    |                                            | not available                                                                           |
|            | DD    | nondimensional                             | fraction between 0-1, indicating percentage of data available (measured)                |

The FLUXNET2015 dataset and the ONEFlux processing pipeline for eddy covariance data  
 Supplementary Materials, Table SM1

|             |       |                                            |                                                                                         |
|-------------|-------|--------------------------------------------|-----------------------------------------------------------------------------------------|
|             | WW-YY | nondimensional                             | fraction between 0-1, indicating percentage of data available (average from daily data) |
| PPFD_DIF    |       |                                            | Photosynthetic photon flux density, diffuse incoming                                    |
|             | HH    | $\mu\text{molPhoton m}^{-2} \text{s}^{-1}$ |                                                                                         |
|             | DD    | $\mu\text{molPhoton m}^{-2} \text{s}^{-1}$ | average from half-hourly data (only days with more than 50% records available)          |
|             | WW-YY | $\mu\text{molPhoton m}^{-2} \text{s}^{-1}$ | average from daily data (only periods with more than 50% records available)             |
| PPFD_DIF_QC |       |                                            | Quality flag of PPFD_DIF                                                                |
|             | HH    |                                            | not available                                                                           |
|             | DD    | nondimensional                             | fraction between 0-1, indicating percentage of data available (measured)                |
|             | WW-YY | nondimensional                             | fraction between 0-1, indicating percentage of data available (average from daily data) |
| PPFD_OUT    |       |                                            | Photosynthetic photon flux density, outgoing                                            |
|             | HH    | $\mu\text{molPhoton m}^{-2} \text{s}^{-1}$ |                                                                                         |
|             | DD    | $\mu\text{molPhoton m}^{-2} \text{s}^{-1}$ | average from half-hourly data (only days with more than 50% records available)          |
|             | WW-YY | $\mu\text{molPhoton m}^{-2} \text{s}^{-1}$ | average from daily data (only periods with more than 50% records available)             |
| PPFD_OUT_QC |       |                                            | Quality flag of PPFD_OUT                                                                |
|             | HH    |                                            | not available                                                                           |
|             | DD    | nondimensional                             | fraction between 0-1, indicating percentage of data available (measured)                |
|             | WW-YY | nondimensional                             | fraction between 0-1, indicating percentage of data available (average from daily data) |
| SW_DIF      |       |                                            | Shortwave radiation, diffuse incoming                                                   |
|             | HH    | $\text{W m}^{-2}$                          |                                                                                         |
|             | DD    | $\text{W m}^{-2}$                          | average from half-hourly data (only days with more than 50% records available)          |
|             | WW-YY | $\text{W m}^{-2}$                          | average from daily data (only periods with more than 50% records available)             |
| SW_DIF_QC   |       |                                            | Quality flag of SW_DIF                                                                  |
|             | HH    |                                            | not available                                                                           |

The FLUXNET2015 dataset and the ONEFlux processing pipeline for eddy covariance data  
 Supplementary Materials, Table SM1

|              |       |                                       |                                                                                         |
|--------------|-------|---------------------------------------|-----------------------------------------------------------------------------------------|
|              | DD    | nondimensional                        | fraction between 0-1, indicating percentage of data available (measured)                |
|              | WW-YY | nondimensional                        | fraction between 0-1, indicating percentage of data available (average from daily data) |
| SW_OUT       |       |                                       | Shortwave radiation, outgoing                                                           |
|              | HH    | W m <sup>-2</sup>                     |                                                                                         |
|              | DD    | W m <sup>-2</sup>                     | average from half-hourly data (only days with more than 50% records available)          |
|              | WW-YY | W m <sup>-2</sup>                     | average from daily data (only periods with more than 50% records available)             |
| SW_OUT_QC    |       |                                       | Quality flag of SW_OUT                                                                  |
|              | HH    |                                       | not available                                                                           |
|              | DD    | nondimensional                        | fraction between 0-1, indicating percentage of data available (measured)                |
|              | WW-YY | nondimensional                        | fraction between 0-1, indicating percentage of data available (average from daily data) |
| LW_OUT       |       |                                       | Longwave radiation, outgoing                                                            |
|              | HH    | W m <sup>-2</sup>                     |                                                                                         |
|              | DD    | W m <sup>-2</sup>                     | average from half-hourly data (only days with more than 50% records available)          |
|              | WW-YY | W m <sup>-2</sup>                     | average from daily data (only periods with more than 50% records available)             |
| LW_OUT_QC    |       |                                       | Quality flag of LW_OUT                                                                  |
|              | HH    |                                       | not available                                                                           |
|              | DD    | nondimensional                        | fraction between 0-1, indicating percentage of data available (measured)                |
|              | WW-YY | nondimensional                        | fraction between 0-1, indicating percentage of data available (average from daily data) |
| CO2_F_MDS    |       |                                       | CO2 mole fraction, gapfilled with MDS                                                   |
|              | HH    | μmolCO <sub>2</sub> mol <sup>-1</sup> |                                                                                         |
|              | DD    | μmolCO <sub>2</sub> mol <sup>-1</sup> | average from half-hourly data                                                           |
|              | WW-YY | μmolCO <sub>2</sub> mol <sup>-1</sup> | average from daily data                                                                 |
| CO2_F_MDS_QC |       |                                       | Quality flag for CO2_F_MDS                                                              |
|              | HH    | nondimensional                        | 0 = measured; 1 = good quality gapfill; 2 = medium; 3 = poor                            |
|              | DD    | nondimensional                        | fraction between 0-1, indicating percentage of measured and good quality gapfill data   |



The FLUXNET2015 dataset and the ONEFlux processing pipeline for eddy covariance data  
 Supplementary Materials, Table SM1

|                          |       |                |                                                                                                                 |
|--------------------------|-------|----------------|-----------------------------------------------------------------------------------------------------------------|
|                          | WW-YY | nondimensional | fraction between 0-1, indicating percentage of measured and good quality gapfill data (average from daily data) |
| TS_F_MDS_#               |       |                | Soil temperature, gapfilled with MDS (numeric index "#" increases with the depth, 1 is shallowest)              |
|                          | HH    | deg C          |                                                                                                                 |
|                          | DD    | deg C          | average from half-hourly data                                                                                   |
|                          | WW-YY | deg C          | average from daily data                                                                                         |
| TS_F_MDS_#_QC            |       |                | Quality flag for TS_F_MDS_#                                                                                     |
|                          | HH    | nondimensional | 0 = measured; 1 = good quality gapfill; 2 = medium; 3 = poor                                                    |
|                          | DD    | nondimensional | fraction between 0-1, indicating percentage of measured and good quality gapfill data                           |
|                          | WW-YY | nondimensional | fraction between 0-1, indicating percentage of measured and good quality gapfill data (average from daily data) |
| SWC_F_MDS_#              |       |                | Soil water content, gapfilled with MDS (numeric index "#" increases with the depth, 1 is shallowest)            |
|                          | HH    | %              |                                                                                                                 |
|                          | DD    | %              | average from half-hourly data                                                                                   |
|                          | WW-YY | %              | average from daily data                                                                                         |
| SWC_F_MDS_#_QC           |       |                | Quality flag for SWC_F_MDS_#                                                                                    |
|                          | HH    | nondimensional | 0 = measured; 1 = good quality gapfill; 2 = medium; 3 = poor                                                    |
|                          | DD    | nondimensional | fraction between 0-1, indicating percentage of measured and good quality gapfill data                           |
|                          | WW-YY | nondimensional | fraction between 0-1, indicating percentage of measured and good quality gapfill data (average from daily data) |
| <b>ENERGY PROCESSING</b> |       |                |                                                                                                                 |
| G_F_MDS                  |       |                | Soil heat flux                                                                                                  |
|                          | HH    | W m-2          |                                                                                                                 |
|                          | DD    | W m-2          | average from half-hourly data                                                                                   |
|                          | WW-YY | W m-2          | average from daily data                                                                                         |
| G_F_MDS_QC               |       |                | Quality flag of G_F_MDS                                                                                         |

The FLUXNET2015 dataset and the ONEFlux processing pipeline for eddy covariance data  
 Supplementary Materials, Table SM1

|             |       |                   |                                                                                                                 |
|-------------|-------|-------------------|-----------------------------------------------------------------------------------------------------------------|
|             | HH    | nondimensional    | 0 = measured; 1 = good quality gapfill; 2 = medium; 3 = poor                                                    |
|             | DD    | nondimensional    | fraction between 0-1, indicating percentage of measured and good quality gapfill data                           |
|             | WW-YY | nondimensional    | fraction between 0-1, indicating percentage of measured and good quality gapfill data (average from daily data) |
| LE_F_MDS    |       |                   | Latent heat flux, gapfilled using MDS method                                                                    |
|             | HH    | W m <sup>-2</sup> |                                                                                                                 |
|             | DD    | W m <sup>-2</sup> | average from half-hourly data                                                                                   |
|             | WW-YY | W m <sup>-2</sup> | average from daily data                                                                                         |
| LE_F_MDS_QC |       |                   | Quality flag for LE_F_MDS, LE_CORR, LE_CORR25, and LE_CORR75.                                                   |
|             | HH    | nondimensional    | 0 = measured; 1 = good quality gapfill; 2 = medium; 3 = poor                                                    |
|             | DD    | nondimensional    | fraction between 0-1, indicating percentage of measured and good quality gapfill data                           |
|             | WW-YY | nondimensional    | fraction between 0-1, indicating percentage of measured and good quality gapfill data (average from daily data) |
| LE_CORR     |       |                   | Latent heat flux, corrected LE_F_MDS by energy balance closure correction factor                                |
|             | HH    | W m <sup>-2</sup> |                                                                                                                 |
|             | DD    | W m <sup>-2</sup> | average from half-hourly data                                                                                   |
|             | WW-YY | W m <sup>-2</sup> | average from daily data                                                                                         |
| LE_CORR_25  |       |                   | Latent heat flux, corrected LE_F_MDS by energy balance closure correction factor, 25th percentile               |
|             | HH    | W m <sup>-2</sup> |                                                                                                                 |
|             | DD    | W m <sup>-2</sup> | average from half-hourly data                                                                                   |
|             | WW-YY |                   | not available                                                                                                   |
| LE_CORR_75  |       |                   | Latent heat flux, corrected LE_F_MDS by energy balance closure correction factor, 75th percentile               |
|             | HH    | W m <sup>-2</sup> |                                                                                                                 |
|             | DD    | W m <sup>-2</sup> | average from half-hourly data                                                                                   |
|             | WW-YY |                   | not available                                                                                                   |

The FLUXNET2015 dataset and the ONEFlux processing pipeline for eddy covariance data  
Supplementary Materials, Table SM1

|                   |                |                                                                                                                                                                  |
|-------------------|----------------|------------------------------------------------------------------------------------------------------------------------------------------------------------------|
| LE_RANDUNC        |                | Random uncertainty of LE, from measured only data                                                                                                                |
| HH                | W m-2          | uses only data point where LE_F_MDS_QC is 0 and two hierarchical methods (see header and LE_RANDUNC_METHOD)                                                      |
| DD-YY             | W m-2          | from random uncertainty of individual half-hours ( $\text{rand}(i) = [\text{SQRT}(\text{SUM}(\text{rand}(i)^2)) / n]$ , where n is the number of half-hours used |
| LE_RANDUNC_METHOD |                | Method used to estimate the random uncertainty of LE                                                                                                             |
| HH                | nondimensional | 1 = RANDUNC Method 1 (direct SD method), 2 = RANDUNC Method 2 (median SD method)                                                                                 |
| DD-YY             |                | not available                                                                                                                                                    |
| LE_RANDUNC_N      |                | Number of half-hour data points used to estimate the random uncertainty of LE                                                                                    |
| HH                | nondimensional |                                                                                                                                                                  |
| DD-YY             |                | not available                                                                                                                                                    |
| LE_CORR_JOINTUNC  |                | Joint uncertainty estimation for LE                                                                                                                              |
| HH-DD             | W m-2          | $[\text{SQRT}(\text{LE\_RANDUNC}^2 + ((\text{LE\_CORR75} - \text{LE\_CORR25}) / 1.349)^2)]$                                                                      |
| WW-YY             |                | not available                                                                                                                                                    |
| H_F_MDS           |                | Sensible heat flux, gapfilled using MDS method                                                                                                                   |
| HH                | W m-2          |                                                                                                                                                                  |
| DD                | W m-2          | average from half-hourly data                                                                                                                                    |
| WW-YY             | W m-2          | average from daily data                                                                                                                                          |
| H_F_MDS_QC        |                | Quality flag for H_F_MDS, H_CORR, H_CORR25, and H_CORR75.                                                                                                        |
| HH                | nondimensional | 0 = measured; 1 = good quality gapfill; 2 = medium; 3 = poor                                                                                                     |
| DD                | nondimensional | fraction between 0-1, indicating percentage of measured and good quality gapfill data                                                                            |
| WW-YY             | nondimensional | fraction between 0-1, indicating percentage of measured and good quality gapfill data (average from daily data)                                                  |
| H_CORR            |                | Sensible heat flux, corrected H_F_MDS by energy balance closure correction factor                                                                                |

The FLUXNET2015 dataset and the ONEFlux processing pipeline for eddy covariance data  
Supplementary Materials, Table SM1

|                    |       |                |                                                                                                                                                                  |
|--------------------|-------|----------------|------------------------------------------------------------------------------------------------------------------------------------------------------------------|
|                    | HH    | W m-2          |                                                                                                                                                                  |
|                    | DD    | W m-2          | average from half-hourly data                                                                                                                                    |
|                    | WW-YY | W m-2          | average from daily data                                                                                                                                          |
| H_CORR_25          |       |                | Sensible heat flux, corrected H_F_MDS by energy balance closure correction factor, 25th percentile                                                               |
|                    | HH    | W m-2          |                                                                                                                                                                  |
|                    | DD    | W m-2          | average from half-hourly data                                                                                                                                    |
|                    | WW-YY |                | not available                                                                                                                                                    |
| H_CORR_75          |       |                | Sensible heat flux, corrected H_F_MDS by energy balance closure correction factor, 75th percentile                                                               |
|                    | HH    | W m-2          |                                                                                                                                                                  |
|                    | DD    | W m-2          | average from half-hourly data                                                                                                                                    |
|                    | WW-YY |                | not available                                                                                                                                                    |
| H_RANDOMUNC        |       |                | Random uncertainty of H, from measured only data                                                                                                                 |
|                    | HH    | W m-2          | uses only data point where H_F_MDS_QC is 0 and two hierarchical methods (see header and H_RANDOMUNC_METHOD)                                                      |
|                    | DD-YY | W m-2          | from random uncertainty of individual half-hours ( $\text{rand}(i) = [\text{SQRT}(\text{SUM}(\text{rand}(i)^2)) / n]$ , where n is the number of half-hours used |
| H_RANDOMUNC_METHOD |       |                | Method used to estimate the random uncertainty of H                                                                                                              |
|                    | HH    | nondimensional | 1 = RANDOMUNC Method 1 (direct SD method), 2 = RANDOMUNC Method 2 (median SD method)                                                                             |
|                    | DD-YY |                | not available                                                                                                                                                    |
| H_RANDOMUNC_N      |       |                | Number of half-hour data points used to estimate the random uncertainty of H                                                                                     |
|                    | HH    | nondimensional |                                                                                                                                                                  |
|                    | DD-YY |                | not available                                                                                                                                                    |
| H_CORR_JOINTUNC    |       |                | Joint uncertainty estimation for H                                                                                                                               |
|                    | HH-DD | W m-2          | $[\text{SQRT}(\text{H\_RANDOMUNC}^2 + ((\text{H\_CORR75} - \text{H\_CORR25}) / 1.349)^2)]$                                                                       |
|                    | WW-YY |                | not available                                                                                                                                                    |

The FLUXNET2015 dataset and the ONEFlux processing pipeline for eddy covariance data  
 Supplementary Materials, Table SM1

|                               |                |                                                                                                                                                                                                           |
|-------------------------------|----------------|-----------------------------------------------------------------------------------------------------------------------------------------------------------------------------------------------------------|
| EBC_CF_N                      |                | Number of data points used to calculate energy closure balance correction factor. Driver data points within sliding window (ECB_CF Method 1) or number of ECB_CF data points (for ECB_CF Methods 2 and 3) |
| HH                            | nondimensional | for ECB_CF Method 1 (minimum 5, maximum 93)                                                                                                                                                               |
| DD                            | nondimensional | for ECB_CF Method 1 (minimum 5, maximum 15)                                                                                                                                                               |
| WW-YY                         | nondimensional | fraction between 0-1, indicating percentages of half-hours used with respect to theoretical maximum number of half hours                                                                                  |
| EBC_CF_METHOD                 |                | Method used to calculate the energy balance closure correction factor                                                                                                                                     |
| HH-YY                         | nondimensional | 1 = ECB_CF Method 1, 2 = ECB_CF Method 2, 3 = ECB_CF Method 3. See general description for details                                                                                                        |
| <b>NET ECOSYSTEM EXCHANGE</b> |                |                                                                                                                                                                                                           |
| NIGHT                         |                | Flag indicating nighttime interval based on SW_IN_POT                                                                                                                                                     |
| HH                            | nondimensional | 0 = daytime, 1 = nighttime                                                                                                                                                                                |
| DD-YY                         |                | not available                                                                                                                                                                                             |
| NIGHT_D                       |                | Number of half hours classified as nighttime in the period, i.e., when SW_IN_POT is 0                                                                                                                     |
| HH                            |                | not available                                                                                                                                                                                             |
| DD                            | nondimensional | number of half-hours                                                                                                                                                                                      |
| WW-MM                         | nondimensional | number of halfhours (average of the daily data)                                                                                                                                                           |
| YY                            |                | not available                                                                                                                                                                                             |
| DAY_D                         |                | Number of half hours classified as daytime in the period, i.e., when SW_IN_POT is greater than 0                                                                                                          |
| HH                            |                | not available                                                                                                                                                                                             |
| DD                            | nondimensional | number of half-hours                                                                                                                                                                                      |
| WW-MM                         | nondimensional | number of halfhours (average of the daily data)                                                                                                                                                           |
| YY                            |                | not available                                                                                                                                                                                             |

The FLUXNET2015 dataset and the ONEFlux processing pipeline for eddy covariance data  
 Supplementary Materials, Table SM1

|                 |       |                                                   |                                                                                                                                                                                                   |
|-----------------|-------|---------------------------------------------------|---------------------------------------------------------------------------------------------------------------------------------------------------------------------------------------------------|
| NIGHT_RANDUNC_N |       |                                                   | Number of half hours classified as nighttime and used to calculate the aggregated random uncertainty                                                                                              |
|                 | HH    |                                                   | not available                                                                                                                                                                                     |
|                 | DD    | nondimensional                                    | number of half-hours                                                                                                                                                                              |
|                 | WW-YY | nondimensional                                    | number of halfhours (average of the daily data)                                                                                                                                                   |
| DAY_RANDUNC_N   |       |                                                   | Number of half hours classified as daytime and used to calculate the aggregated random uncertainty                                                                                                |
|                 | HH    |                                                   | not available                                                                                                                                                                                     |
|                 | DD    | nondimensional                                    | number of half-hours                                                                                                                                                                              |
|                 | WW-YY | nondimensional                                    | number of halfhours (average of the daily data)                                                                                                                                                   |
| NEE_CUT_REF     |       |                                                   | Net Ecosystem Exchange, using Constant Ustar Threshold (CUT) across years, reference selected on the basis of the model efficiency (MEF). The MEF analysis is repeated for each time aggregation  |
|                 | HH    | $\mu\text{molCO}_2 \text{ m}^{-2} \text{ s}^{-1}$ |                                                                                                                                                                                                   |
|                 | DD    | $\text{gC m}^{-2} \text{ d}^{-1}$                 | calculated from half-hourly data                                                                                                                                                                  |
|                 | WW-MM | $\text{gC m}^{-2} \text{ d}^{-1}$                 | average from daily data                                                                                                                                                                           |
|                 | YY    | $\text{gC m}^{-2} \text{ y}^{-1}$                 | sum from daily data                                                                                                                                                                               |
| NEE_VUT_REF     |       |                                                   | Net Ecosystem Exchange, using Variable Ustar Threshold (VUT) for each year, reference selected on the basis of the model efficiency (MEF). The MEF analysis is repeated for each time aggregation |
|                 | HH    | $\mu\text{molCO}_2 \text{ m}^{-2} \text{ s}^{-1}$ |                                                                                                                                                                                                   |
|                 | DD    | $\text{gC m}^{-2} \text{ d}^{-1}$                 | calculated from half-hourly data                                                                                                                                                                  |
|                 | WW-MM | $\text{gC m}^{-2} \text{ d}^{-1}$                 | average from daily data                                                                                                                                                                           |
|                 | YY    | $\text{gC m}^{-2} \text{ y}^{-1}$                 | sum from daily data                                                                                                                                                                               |
| NEE_CUT_REF_QC  |       |                                                   | Quality flag for NEE_CUT_REF                                                                                                                                                                      |
|                 | HH    | nondimensional                                    | 0 = measured; 1 = good quality gapfill; 2 = medium; 3 = poor                                                                                                                                      |
|                 | DD    | nondimensional                                    | fraction between 0-1, indicating percentage of measured and good quality gapfill data                                                                                                             |

The FLUXNET2015 dataset and the ONEFlux processing pipeline for eddy covariance data  
 Supplementary Materials, Table SM1

|                            |       |                                                   |                                                                                                                                                                  |
|----------------------------|-------|---------------------------------------------------|------------------------------------------------------------------------------------------------------------------------------------------------------------------|
|                            | WW-YY | nondimensional                                    | fraction between 0-1, indicating percentage of measured and good quality gapfill data (average from daily data)                                                  |
| NEE_VUT_REF_QC             |       |                                                   | Quality flag for NEE_VUT_REF                                                                                                                                     |
|                            | HH    | nondimensional                                    | 0 = measured; 1 = good quality gapfill; 2 = medium; 3 = poor                                                                                                     |
|                            | DD    | nondimensional                                    | fraction between 0-1, indicating percentage of measured and good quality gapfill data                                                                            |
|                            | WW-YY | nondimensional                                    | fraction between 0-1, indicating percentage of measured and good quality gapfill data (average from daily data)                                                  |
| NEE_CUT_REF_RANDUNC        |       |                                                   | Random uncertainty for NEE_CUT_REF, from measured only data                                                                                                      |
|                            | HH    | $\mu\text{molCO}_2 \text{ m}^{-2} \text{ s}^{-1}$ | uses only data points where NEE_CUT_REF_QC is 0 and two hierarchical methods - see header and NEE_CUT_REF_RANDUNC_METHOD                                         |
|                            | DD-MM | $\text{gC m}^{-2} \text{ d}^{-1}$                 | from random uncertainty of individual half-hours $(\text{rand}(i)) = [\text{SQRT}(\text{SUM}(\text{rand}(i)^2)) / n]$ , where n is the number of half-hours used |
|                            | YY    | $\text{gC m}^{-2} \text{ y}^{-1}$                 | from random uncertainty of individual half-hours $(\text{rand}(i)) = [\text{SQRT}(\text{SUM}(\text{rand}(i)^2)) / n]$ , where n is the number of half-hours used |
| NEE_VUT_REF_RANDUNC        |       |                                                   | Random uncertainty for NEE_VUT_REF, from measured only data                                                                                                      |
|                            | HH    | $\mu\text{molCO}_2 \text{ m}^{-2} \text{ s}^{-1}$ | uses only data points where NEE_VUT_REF_QC is 0 and two hierarchical methods - see header and NEE_VUT_REF_RANDUNC_METHOD                                         |
|                            | DD-MM | $\text{gC m}^{-2} \text{ d}^{-1}$                 | from random uncertainty of individual half-hours $(\text{rand}(i)) = [\text{SQRT}(\text{SUM}(\text{rand}(i)^2)) / n]$ , where n is the number of half-hours used |
|                            | YY    | $\text{gC m}^{-2} \text{ y}^{-1}$                 | from random uncertainty of individual half-hours $(\text{rand}(i)) = [\text{SQRT}(\text{SUM}(\text{rand}(i)^2)) / n]$ , where n is the number of half-hours used |
| NEE_CUT_REF_RANDUNC_METHOD |       |                                                   | Method used to estimate the random uncertainty of NEE_CUT_REF                                                                                                    |

The FLUXNET2015 dataset and the ONEFlux processing pipeline for eddy covariance data  
Supplementary Materials, Table SM1

|                                |       |                                                   |                                                                                                                           |
|--------------------------------|-------|---------------------------------------------------|---------------------------------------------------------------------------------------------------------------------------|
|                                | HH    | nondimensional                                    | 1 = RANDUNC Method 1 (direct SD method), 2 = RANDUNC Method 2 (median SD method)                                          |
|                                | DD-YY |                                                   | not available                                                                                                             |
| NEE_VUT_REF_RANDUNC_MET<br>HOD |       |                                                   | Method used to estimate the random uncertainty of NEE_VUT_REF                                                             |
|                                | HH    | nondimensional                                    | 1 = RANDUNC Method 1 (direct SD method), 2 = RANDUNC Method 2 (median SD method)                                          |
|                                | DD-YY |                                                   | not available                                                                                                             |
| NEE_CUT_REF_RANDUNC_N          |       |                                                   | Number of data points used to estimate the random uncertainty of NEE_CUT_REF                                              |
|                                | HH    | nondimensional                                    |                                                                                                                           |
|                                | DD-YY |                                                   | not available                                                                                                             |
| NEE_VUT_REF_RANDUNC_N          |       |                                                   | Number of data points used to estimate the random uncertainty of NEE_VUT_REF                                              |
|                                | HH    | nondimensional                                    |                                                                                                                           |
|                                | DD-YY |                                                   | not available                                                                                                             |
| NEE_CUT_REF_JOINTUNC           |       |                                                   | Joint uncertainty estimation for NEE_CUT_REF, including random uncertainty and USTAR filtering uncertainty                |
|                                | HH    | $\mu\text{molCO}_2 \text{ m}^{-2} \text{ s}^{-1}$ | $[\text{SQRT}(\text{NEE\_CUT\_REF\_RANDUNC}^2 + ((\text{NEE\_CUT\_84} - \text{NEE\_CUT\_16}) / 2)^2)]$ for each half-hour |
|                                | DD    | $\text{gC m}^{-2} \text{ d}^{-1}$                 | $[\text{SQRT}(\text{NEE\_CUT\_REF\_RANDUNC}^2 + ((\text{NEE\_CUT\_84} - \text{NEE\_CUT\_16}) / 2)^2)]$ for each day       |
|                                | WW    | $\text{gC m}^{-2} \text{ d}^{-1}$                 | $[\text{SQRT}(\text{NEE\_CUT\_REF\_RANDUNC}^2 + ((\text{NEE\_CUT\_84} - \text{NEE\_CUT\_16}) / 2)^2)]$ for each week      |
|                                | MM    | $\text{gC m}^{-2} \text{ d}^{-1}$                 | $[\text{SQRT}(\text{NEE\_CUT\_REF\_RANDUNC}^2 + ((\text{NEE\_CUT\_84} - \text{NEE\_CUT\_16}) / 2)^2)]$ for each month     |
|                                | YY    | $\text{gC m}^{-2} \text{ y}^{-1}$                 | $[\text{SQRT}(\text{NEE\_CUT\_REF\_RANDUNC}^2 + ((\text{NEE\_CUT\_84} - \text{NEE\_CUT\_16}) / 2)^2)]$ for each year      |
| NEE_VUT_REF_JOINTUNC           |       |                                                   | Joint uncertainty estimation for NEE_VUT_REF, including random uncertainty and USTAR filtering uncertainty                |



The FLUXNET2015 dataset and the ONEFlux processing pipeline for eddy covariance data  
Supplementary Materials, Table SM1

|                    |       |                                                   |                                                                                                                           |
|--------------------|-------|---------------------------------------------------|---------------------------------------------------------------------------------------------------------------------------|
|                    | HH    | $\mu\text{molCO}_2 \text{ m}^{-2} \text{ s}^{-1}$ | $[\text{SQRT}(\text{NEE\_VUT\_REF\_RANDUNC}^2 + ((\text{NEE\_VUT\_84} - \text{NEE\_VUT\_16}) / 2)^2)]$ for each half-hour |
|                    | DD    | $\text{gC m}^{-2} \text{ d}^{-1}$                 | $[\text{SQRT}(\text{NEE\_VUT\_REF\_RANDUNC}^2 + ((\text{NEE\_VUT\_84} - \text{NEE\_VUT\_16}) / 2)^2)]$ for each day       |
|                    | WW    | $\text{gC m}^{-2} \text{ d}^{-1}$                 | $[\text{SQRT}(\text{NEE\_VUT\_REF\_RANDUNC}^2 + ((\text{NEE\_VUT\_84} - \text{NEE\_VUT\_16}) / 2)^2)]$ for each week      |
|                    | MM    | $\text{gC m}^{-2} \text{ d}^{-1}$                 | $[\text{SQRT}(\text{NEE\_VUT\_REF\_RANDUNC}^2 + ((\text{NEE\_VUT\_84} - \text{NEE\_VUT\_16}) / 2)^2)]$ for each month     |
|                    | YY    | $\text{gC m}^{-2} \text{ y}^{-1}$                 | $[\text{SQRT}(\text{NEE\_VUT\_REF\_RANDUNC}^2 + ((\text{NEE\_VUT\_84} - \text{NEE\_VUT\_16}) / 2)^2)]$ for each year      |
| NEE_CUT_USTAR50    |       |                                                   | Net Ecosystem Exchange, using Constant Ustar Threshold (CUT) across years, from 50 percentile of USTAR threshold          |
|                    | HH    | $\mu\text{molCO}_2 \text{ m}^{-2} \text{ s}^{-1}$ |                                                                                                                           |
|                    | DD    | $\text{gC m}^{-2} \text{ d}^{-1}$                 | calculated from half-hourly data                                                                                          |
|                    | WW-MM | $\text{gC m}^{-2} \text{ d}^{-1}$                 | average from daily data                                                                                                   |
|                    | YY    | $\text{gC m}^{-2} \text{ y}^{-1}$                 | sum from daily data                                                                                                       |
| NEE_VUT_USTAR50    |       |                                                   | Net Ecosystem Exchange, using Variable Ustar Threshold (VUT) for each year, from 50 percentile of USTAR threshold         |
|                    | HH    | $\mu\text{molCO}_2 \text{ m}^{-2} \text{ s}^{-1}$ |                                                                                                                           |
|                    | DD    | $\text{gC m}^{-2} \text{ d}^{-1}$                 | calculated from half-hourly data                                                                                          |
|                    | WW-MM | $\text{gC m}^{-2} \text{ d}^{-1}$                 | average from daily data                                                                                                   |
|                    | YY    | $\text{gC m}^{-2} \text{ y}^{-1}$                 | sum from daily data                                                                                                       |
| NEE_CUT_USTAR50_QC |       |                                                   | Quality flag for NEE_CUT_USTAR50                                                                                          |
|                    | HH    | nondimensional                                    | 0 = measured; 1 = good quality gapfill; 2 = medium; 3 = poor                                                              |
|                    | DD    | nondimensional                                    | fraction between 0-1, indicating percentage of measured and good quality gapfill data                                     |
|                    | WW-YY | nondimensional                                    | fraction between 0-1, indicating percentage of measured and good quality gapfill data (average from daily data)           |
| NEE_VUT_USTAR50_QC |       |                                                   | Quality flag for NEE_VUT_USTAR50                                                                                          |

The FLUXNET2015 dataset and the ONEFlux processing pipeline for eddy covariance data  
 Supplementary Materials, Table SM1

|                                |       |                                                   |                                                                                                                                                                  |
|--------------------------------|-------|---------------------------------------------------|------------------------------------------------------------------------------------------------------------------------------------------------------------------|
|                                | HH    | nondimensional                                    | 0 = measured; 1 = good quality gapfill; 2 = medium; 3 = poor                                                                                                     |
|                                | DD    | nondimensional                                    | fraction between 0-1, indicating percentage of measured and good quality gapfill data                                                                            |
|                                | WW-YY | nondimensional                                    | fraction between 0-1, indicating percentage of measured and good quality gapfill data (average from daily data)                                                  |
| NEE_CUT_USTAR50_RANDUNC        |       |                                                   | Random uncertainty for NEE_CUT_USTAR50, from measured only data                                                                                                  |
|                                | HH    | $\mu\text{molCO}_2 \text{ m}^{-2} \text{ s}^{-1}$ | uses only data points where NEE_CUT_USTAR50_QC is 0 and two hierarchical methods - see header and NEE_CUT_USTAR50_RANDUNC_METHOD                                 |
|                                | DD-MM | $\text{gC m}^{-2} \text{ d}^{-1}$                 | from random uncertainty of individual half-hours $(\text{rand}(i)) = [\text{SQRT}(\text{SUM}(\text{rand}(i)^2)) / n]$ , where n is the number of half-hours used |
|                                | YY    | $\text{gC m}^{-2} \text{ y}^{-1}$                 | from random uncertainty of individual half-hours $(\text{rand}(i)) = [\text{SQRT}(\text{SUM}(\text{rand}(i)^2)) / n]$ , where n is the number of half-hours used |
| NEE_VUT_USTAR50_RANDUNC        |       |                                                   | Random uncertainty for NEE_VUT_USTAR50, from measured only data                                                                                                  |
|                                | HH    | $\mu\text{molCO}_2 \text{ m}^{-2} \text{ s}^{-1}$ | uses only data points where NEE_VUT_USTAR50_QC is 0 and two hierarchical methods see header and NEE_VUT_USTAR50_RANDUNC_METHOD                                   |
|                                | DD-MM | $\text{gC m}^{-2} \text{ d}^{-1}$                 | from random uncertainty of individual half-hours $(\text{rand}(i)) = [\text{SQRT}(\text{SUM}(\text{rand}(i)^2)) / n]$ , where n is the number of half-hours used |
|                                | YY    | $\text{gC m}^{-2} \text{ y}^{-1}$                 | from random uncertainty of individual half-hours $(\text{rand}(i)) = [\text{SQRT}(\text{SUM}(\text{rand}(i)^2)) / n]$ , where n is the number of half-hours used |
| NEE_CUT_USTAR50_RANDUNC_METHOD |       |                                                   | Method used to estimate the random uncertainty of NEE_CUT_USTAR50                                                                                                |

The FLUXNET2015 dataset and the ONEFlux processing pipeline for eddy covariance data  
 Supplementary Materials, Table SM1

|                                |       |                                                   |                                                                                                                                  |
|--------------------------------|-------|---------------------------------------------------|----------------------------------------------------------------------------------------------------------------------------------|
|                                | HH    | nondimensional                                    | 1 = RANDUNC Method 1 (direct SD method), 2 = RANDUNC Method 2 (median SD method)                                                 |
|                                | DD-YY |                                                   | not available                                                                                                                    |
| NEE_VUT_USTAR50_RANDUNC_METHOD |       |                                                   | Method used to estimate the random uncertainty of NEE_VUT_USTAR50                                                                |
|                                | HH    | nondimensional                                    | 1 = RANDUNC Method 1 (direct SD method), 2 = RANDUNC Method 2 (median SD method)                                                 |
|                                | DD-YY |                                                   | not available                                                                                                                    |
| NEE_CUT_USTAR50_RANDUNC_N      |       |                                                   | Number of half-hour data points used to estimate the random uncertainty of NEE_CUT_USTAR50                                       |
|                                | HH    | nondimensional                                    |                                                                                                                                  |
|                                | DD-YY |                                                   | not available                                                                                                                    |
| NEE_VUT_USTAR50_RANDUNC_N      |       |                                                   | Number of half-hour data points used to estimate the random uncertainty of NEE_VUT_USTAR50                                       |
|                                | HH    | nondimensional                                    |                                                                                                                                  |
|                                | DD-YY |                                                   | not available                                                                                                                    |
| NEE_CUT_USTAR50_JOINTUNC       |       |                                                   | Joint uncertainty estimation for NEE_CUT_USTAR50, including random uncertainty and USTAR filtering uncertainty                   |
|                                | HH    | $\mu\text{molCO}_2 \text{ m}^{-2} \text{ s}^{-1}$ | $[\text{SQRT}(\text{NEE\_CUT\_USTAR50\_RANDUNC}^2 + ((\text{NEE\_CUT\_84} - \text{NEE\_CUT\_16}) / 2)^2)]$<br>for each half-hour |
|                                | DD    | $\text{gC m}^{-2} \text{ d}^{-1}$                 | $[\text{SQRT}(\text{NEE\_CUT\_USTAR50\_RANDUNC}^2 + ((\text{NEE\_CUT\_84} - \text{NEE\_CUT\_16}) / 2)^2)]$<br>for each day       |
|                                | WW    | $\text{gC m}^{-2} \text{ d}^{-1}$                 | $[\text{SQRT}(\text{NEE\_CUT\_USTAR50\_RANDUNC}^2 + ((\text{NEE\_CUT\_84} - \text{NEE\_CUT\_16}) / 2)^2)]$<br>for each week      |
|                                | MM    | $\text{gC m}^{-2} \text{ d}^{-1}$                 | $[\text{SQRT}(\text{NEE\_CUT\_USTAR50\_RANDUNC}^2 + ((\text{NEE\_CUT\_84} - \text{NEE\_CUT\_16}) / 2)^2)]$<br>for each month     |
|                                | YY    | $\text{gC m}^{-2} \text{ y}^{-1}$                 | $[\text{SQRT}(\text{NEE\_CUT\_USTAR50\_RANDUNC}^2 + ((\text{NEE\_CUT\_84} - \text{NEE\_CUT\_16}) / 2)^2)]$<br>for each year      |

The FLUXNET2015 dataset and the ONEFlux processing pipeline for eddy covariance data  
 Supplementary Materials, Table SM1

|                          |                                                   |                                                                                                                                  |
|--------------------------|---------------------------------------------------|----------------------------------------------------------------------------------------------------------------------------------|
| NEE_VUT_USTAR50_JOINTUNC |                                                   | Joint uncertainty estimation for NEE_VUT_USTAR50, including random uncertainty and USTAR filtering uncertainty                   |
| HH                       | $\mu\text{molCO}_2 \text{ m}^{-2} \text{ s}^{-1}$ | $[\text{SQRT}(\text{NEE\_VUT\_USTAR50\_RANDUNC}^2 + ((\text{NEE\_VUT\_84} - \text{NEE\_VUT\_16}) / 2)^2)]$<br>for each half-hour |
| DD                       | $\text{gC m}^{-2} \text{ d}^{-1}$                 | $[\text{SQRT}(\text{NEE\_VUT\_USTAR50\_RANDUNC}^2 + ((\text{NEE\_VUT\_84} - \text{NEE\_VUT\_16}) / 2)^2)]$<br>for each day       |
| WW                       | $\text{gC m}^{-2} \text{ d}^{-1}$                 | $[\text{SQRT}(\text{NEE\_VUT\_USTAR50\_RANDUNC}^2 + ((\text{NEE\_VUT\_84} - \text{NEE\_VUT\_16}) / 2)^2)]$<br>for each week      |
| MM                       | $\text{gC m}^{-2} \text{ d}^{-1}$                 | $[\text{SQRT}(\text{NEE\_VUT\_USTAR50\_RANDUNC}^2 + ((\text{NEE\_VUT\_84} - \text{NEE\_VUT\_16}) / 2)^2)]$<br>for each month     |
| YY                       | $\text{gC m}^{-2} \text{ y}^{-1}$                 | $[\text{SQRT}(\text{NEE\_VUT\_USTAR50\_RANDUNC}^2 + ((\text{NEE\_VUT\_84} - \text{NEE\_VUT\_16}) / 2)^2)]$<br>for each year      |
| NEE_CUT_MEAN             |                                                   | Net Ecosystem Exchange, using Constant Ustar Threshold (CUT) across years, average from 40 NEE_CUT_XX versions                   |
| HH                       | $\mu\text{molCO}_2 \text{ m}^{-2} \text{ s}^{-1}$ | average from 40 half-hourly NEE_CUT_XX                                                                                           |
| DD                       | $\text{gC m}^{-2} \text{ d}^{-1}$                 | average from 40 daily NEE_CUT_XX                                                                                                 |
| WW                       | $\text{gC m}^{-2} \text{ d}^{-1}$                 | average from 40 weekly NEE_CUT_XX                                                                                                |
| MM                       | $\text{gC m}^{-2} \text{ d}^{-1}$                 | average from 40 monthly NEE_CUT_XX                                                                                               |
| YY                       | $\text{gC m}^{-2} \text{ y}^{-1}$                 | average from 40 yearly NEE_CUT_XX                                                                                                |
| NEE_VUT_MEAN             |                                                   | Net Ecosystem Exchange, using Variable Ustar Threshold (VUT) for each year, average from 40 NEE_VUT_XX versions                  |
| HH                       | $\mu\text{molCO}_2 \text{ m}^{-2} \text{ s}^{-1}$ | average from 40 half-hourly NEE_CUT_XX                                                                                           |
| DD                       | $\text{gC m}^{-2} \text{ d}^{-1}$                 | average from 40 daily NEE_CUT_XX                                                                                                 |
| WW                       | $\text{gC m}^{-2} \text{ d}^{-1}$                 | average from 40 weekly NEE_CUT_XX                                                                                                |
| MM                       | $\text{gC m}^{-2} \text{ d}^{-1}$                 | average from 40 monthly NEE_CUT_XX                                                                                               |
| YY                       | $\text{gC m}^{-2} \text{ y}^{-1}$                 | average from 40 yearly NEE_CUT_XX                                                                                                |
| NEE_CUT_MEAN_QC          |                                                   | Quality flag for NEE_CUT_MEAN, fraction between 0-1 indicating percentage of good quality data                                   |

The FLUXNET2015 dataset and the ONEFlux processing pipeline for eddy covariance data  
 Supplementary Materials, Table SM1

|                 |       |                                                   |                                                                                                                                                                                     |
|-----------------|-------|---------------------------------------------------|-------------------------------------------------------------------------------------------------------------------------------------------------------------------------------------|
|                 | HH    | nondimensional                                    | average of percentages of good data (NEE_CUT_XX_QC is 0 or 1) from 40 NEE_CUT_XX_QC                                                                                                 |
|                 | DD-YY | nondimensional                                    | average of 40 NEE_CUT_XX_QC for the period                                                                                                                                          |
| NEE_VUT_MEAN_QC |       |                                                   | Quality flag for NEE_VUT_MEAN, fraction between 0-1 indicating percentage of good quality data                                                                                      |
|                 | HH    | nondimensional                                    | average of percentages of good data (NEE_VUT_XX_QC is 0 or 1) from 40 NEE_VUT_XX_QC                                                                                                 |
|                 | DD-YY | nondimensional                                    | average of 40 NEE_VUT_XX_QC for the period                                                                                                                                          |
| NEE_CUT_SE      |       |                                                   | Standard Error for NEE_CUT, calculated as $SD(NEE\_CUT\_XX) / \sqrt{40}$                                                                                                            |
|                 | HH    | $\mu\text{molCO}_2 \text{ m}^{-2} \text{ s}^{-1}$ | SE from 40 half-hourly NEE_CUT_XX                                                                                                                                                   |
|                 | DD    | $\text{gC m}^{-2} \text{ d}^{-1}$                 | SE from 40 daily NEE_CUT_XX                                                                                                                                                         |
|                 | WW    | $\text{gC m}^{-2} \text{ d}^{-1}$                 | SE from 40 weekly NEE_CUT_XX                                                                                                                                                        |
|                 | MM    | $\text{gC m}^{-2} \text{ d}^{-1}$                 | SE from 40 monthly NEE_CUT_XX                                                                                                                                                       |
|                 | YY    | $\text{gC m}^{-2} \text{ y}^{-1}$                 | SE from 40 yearly NEE_CUT_XX                                                                                                                                                        |
| NEE_VUT_SE      |       |                                                   | Standard Error for NEE_VUT, calculated as $SD(NEE\_VUT\_XX) / \sqrt{40}$                                                                                                            |
|                 | HH    | $\mu\text{molCO}_2 \text{ m}^{-2} \text{ s}^{-1}$ | SE from 40 half-hourly NEE_CUT_XX                                                                                                                                                   |
|                 | DD    | $\text{gC m}^{-2} \text{ d}^{-1}$                 | SE from 40 daily NEE_CUT_XX                                                                                                                                                         |
|                 | WW    | $\text{gC m}^{-2} \text{ d}^{-1}$                 | SE from 40 weekly NEE_CUT_XX                                                                                                                                                        |
|                 | MM    | $\text{gC m}^{-2} \text{ d}^{-1}$                 | SE from 40 monthly NEE_CUT_XX                                                                                                                                                       |
|                 | YY    | $\text{gC m}^{-2} \text{ y}^{-1}$                 | SE from 40 yearly NEE_CUT_XX                                                                                                                                                        |
| NEE_CUT_XX      |       |                                                   | NEE CUT percentiles (approx. percentile indicated by XX, see doc.) calculated from the 40 estimates aggregated at the different time resolutions -- XX = 05, 16, 25, 50, 75, 84, 95 |
|                 | HH    | $\mu\text{molCO}_2 \text{ m}^{-2} \text{ s}^{-1}$ | XXth percentile from 40 half-hourly NEE_CUT_XX                                                                                                                                      |
|                 | DD    | $\text{gC m}^{-2} \text{ d}^{-1}$                 | XXth percentile from 40 daily NEE_CUT_XX                                                                                                                                            |
|                 | WW    | $\text{gC m}^{-2} \text{ d}^{-1}$                 | XXth percentile from 40 weekly NEE_CUT_XX                                                                                                                                           |
|                 | MM    | $\text{gC m}^{-2} \text{ d}^{-1}$                 | XXth percentile from 40 monthly NEE_CUT_XX                                                                                                                                          |

The FLUXNET2015 dataset and the ONEFlux processing pipeline for eddy covariance data  
 Supplementary Materials, Table SM1

|                   |       |                                                     |                                                                                                                                                                                     |
|-------------------|-------|-----------------------------------------------------|-------------------------------------------------------------------------------------------------------------------------------------------------------------------------------------|
|                   | YY    | gC m <sup>-2</sup> y <sup>-1</sup>                  | XXth percentile from 40 yearly<br>NEE_CUT_XX                                                                                                                                        |
| NEE_VUT_XX        |       |                                                     | NEE VUT percentiles (approx. percentile indicated by XX, see doc.) calculated from the 40 estimates aggregated at the different time resolutions -- XX = 05, 16, 25, 50, 75, 84, 95 |
|                   | HH    | μmolCO <sub>2</sub> m <sup>-2</sup> s <sup>-1</sup> | XXth percentile from 40 half-hourly<br>NEE_VUT_XX                                                                                                                                   |
|                   | DD    | gC m <sup>-2</sup> d <sup>-1</sup>                  | XXth percentile from 40 daily NEE_VUT_XX                                                                                                                                            |
|                   | WW    | gC m <sup>-2</sup> d <sup>-1</sup>                  | XXth percentile from 40 weekly<br>NEE_VUT_XX                                                                                                                                        |
|                   | MM    | gC m <sup>-2</sup> d <sup>-1</sup>                  | XXth percentile from 40 monthly<br>NEE_VUT_XX                                                                                                                                       |
|                   | YY    | gC m <sup>-2</sup> y <sup>-1</sup>                  | XXth percentile from 40 yearly<br>NEE_VUT_XX                                                                                                                                        |
| NEE_CUT_XX_QC     |       |                                                     | Quality flag for NEE_CUT_XX -- XX = 05, 16, 25, 50, 75, 84, 95                                                                                                                      |
|                   | HH    | nondimensional                                      | 0 = measured; 1 = good quality gapfill; 2 = medium; 3 = poor                                                                                                                        |
|                   | DD    | nondimensional                                      | fraction between 0-1, indicating percentage of measured and good quality gapfill data                                                                                               |
|                   | WW-YY | nondimensional                                      | fraction between 0-1, indicating percentage of measured and good quality gapfill data (average from daily data)                                                                     |
| NEE_VUT_XX_QC     |       |                                                     | Quality flag for NEE_VUT_XX -- XX = 05, 16, 25, 50, 75, 84, 95                                                                                                                      |
|                   | HH    | nondimensional                                      | 0 = measured; 1 = good quality gapfill; 2 = medium; 3 = poor                                                                                                                        |
|                   | DD    | nondimensional                                      | fraction between 0-1, indicating percentage of measured and good quality gapfill data                                                                                               |
|                   | WW-YY | nondimensional                                      | fraction between 0-1, indicating percentage of measured and good quality gapfill data (average from daily data)                                                                     |
| NEE_CUT_REF_NIGHT |       |                                                     | Average nighttime NEE, from<br>NEE_CUT_REF                                                                                                                                          |
|                   | HH    |                                                     | not available                                                                                                                                                                       |
|                   | DD    | μmolCO <sub>2</sub> m <sup>-2</sup> s <sup>-1</sup> | average from half-hourly data (where NIGHT is 1)                                                                                                                                    |
|                   | WW-YY | μmolCO <sub>2</sub> m <sup>-2</sup> s <sup>-1</sup> | average from daily data                                                                                                                                                             |

The FLUXNET2015 dataset and the ONEFlux processing pipeline for eddy covariance data  
 Supplementary Materials, Table SM1

|                           |                                                   |                                                                                                                                                             |
|---------------------------|---------------------------------------------------|-------------------------------------------------------------------------------------------------------------------------------------------------------------|
| NEE_VUT_REF_NIGHT         |                                                   | Average nighttime NEE, from NEE_VUT_REF                                                                                                                     |
| HH                        |                                                   | not available                                                                                                                                               |
| DD                        | $\mu\text{molCO}_2 \text{ m}^{-2} \text{ s}^{-1}$ | average from half-hourly data (where NIGHT is 1)                                                                                                            |
| WW-YY                     | $\mu\text{molCO}_2 \text{ m}^{-2} \text{ s}^{-1}$ | average from daily data                                                                                                                                     |
| NEE_CUT_REF_NIGHT_SD      |                                                   | Standard Deviation of the nighttime NEE, from the NEE_CUT_REF                                                                                               |
| HH                        |                                                   | not available                                                                                                                                               |
| DD                        | $\mu\text{molCO}_2 \text{ m}^{-2} \text{ s}^{-1}$ | from half-hourly data (where NIGHT is 1)                                                                                                                    |
| WW-YY                     | $\mu\text{molCO}_2 \text{ m}^{-2} \text{ s}^{-1}$ | from daily data                                                                                                                                             |
| NEE_VUT_REF_NIGHT_SD      |                                                   | Standard Deviation of the nighttime NEE, from the NEE_VUT_REF                                                                                               |
| HH                        |                                                   | not available                                                                                                                                               |
| DD                        | $\mu\text{molCO}_2 \text{ m}^{-2} \text{ s}^{-1}$ | from half-hourly data (where NIGHT is 1)                                                                                                                    |
| WW-YY                     | $\mu\text{molCO}_2 \text{ m}^{-2} \text{ s}^{-1}$ | from daily data                                                                                                                                             |
| NEE_CUT_REF_NIGHT_QC      |                                                   | Quality flag for NEE_CUT_REF_NIGHT                                                                                                                          |
| HH                        |                                                   | not available                                                                                                                                               |
| DD                        | nondimensional                                    | fraction between 0-1, indicating percentage of measured and good quality gapfill data                                                                       |
| WW-YY                     | nondimensional                                    | fraction between 0-1, indicating percentage of measured and good quality gapfill data (average from daily data)                                             |
| NEE_VUT_REF_NIGHT_QC      |                                                   | Quality flag for NEE_VUT_REF_NIGHT                                                                                                                          |
| HH                        |                                                   | not available                                                                                                                                               |
| DD                        | nondimensional                                    | fraction between 0-1, indicating percentage of measured and good quality gapfill data                                                                       |
| WW-YY                     | nondimensional                                    | fraction between 0-1, indicating percentage of measured and good quality gapfill data (average from daily data)                                             |
| NEE_CUT_REF_NIGHT_RANDUNC |                                                   | Random uncertainty of NEE_CUT_REF_NIGHT, from the random uncertainty of the single nighttime half-hours                                                     |
| HH                        |                                                   | not available                                                                                                                                               |
| DD-YY                     | $\mu\text{molCO}_2 \text{ m}^{-2} \text{ s}^{-1}$ | from random uncertainty of individual half-hours where NIGHT is 1 ( $\text{rand}(i)$ ) = $[\text{SQRT}(\text{SUM}(\text{rand}(i)^2)) / n]$ , where n is the |

The FLUXNET2015 dataset and the ONEFlux processing pipeline for eddy covariance data  
 Supplementary Materials, Table SM1

|                            |                                                   |                                                                                                                                                                                                                               |
|----------------------------|---------------------------------------------------|-------------------------------------------------------------------------------------------------------------------------------------------------------------------------------------------------------------------------------|
|                            |                                                   | number of half-hours used to calculate the nighttime aggregation in the day.                                                                                                                                                  |
| NEE_VUT_REF_NIGHT_RANDUNC  |                                                   | Random uncertainty of NEE_VUT_REF_NIGHT, from the random uncertainty of the single nighttime half-hours                                                                                                                       |
| HH                         |                                                   | not available                                                                                                                                                                                                                 |
| DD-YY                      | $\mu\text{molCO}_2 \text{ m}^{-2} \text{ s}^{-1}$ | from random uncertainty of individual half-hours where NIGHT is 1 (rand(i)) = $[\text{SQRT}(\text{SUM}(\text{rand}(i)^2)) / n]$ , where n is the number of half-hours used to calculate the nighttime aggregation in the day. |
| NEE_CUT_REF_NIGHT_JOINTUNC |                                                   | Joint uncertainty estimation for NEE_CUT_REF_NIGHT, including random uncertainty and USTAR filtering uncertainty                                                                                                              |
| HH                         |                                                   | not available                                                                                                                                                                                                                 |
| DD                         | $\mu\text{molCO}_2 \text{ m}^{-2} \text{ s}^{-1}$ | $[\text{SQRT}(\text{NEE\_CUT\_REF\_NIGHT\_RANDUNC}^2 + ((\text{NEE\_CUT\_84\_NIGHT} - \text{NEE\_CUT\_16\_NIGHT}) / 2)^2)]$ for each day                                                                                      |
| WW                         | $\mu\text{molCO}_2 \text{ m}^{-2} \text{ s}^{-1}$ | $[\text{SQRT}(\text{NEE\_CUT\_REF\_NIGHT\_RANDUNC}^2 + ((\text{NEE\_CUT\_84\_NIGHT} - \text{NEE\_CUT\_16\_NIGHT}) / 2)^2)]$ for each week                                                                                     |
| MM                         | $\mu\text{molCO}_2 \text{ m}^{-2} \text{ s}^{-1}$ | $[\text{SQRT}(\text{NEE\_CUT\_REF\_NIGHT\_RANDUNC}^2 + ((\text{NEE\_CUT\_84\_NIGHT} - \text{NEE\_CUT\_16\_NIGHT}) / 2)^2)]$ for each month                                                                                    |
| YY                         | $\mu\text{molCO}_2 \text{ m}^{-2} \text{ s}^{-1}$ | $[\text{SQRT}(\text{NEE\_CUT\_REF\_NIGHT\_RANDUNC}^2 + ((\text{NEE\_CUT\_84\_NIGHT} - \text{NEE\_CUT\_16\_NIGHT}) / 2)^2)]$ for each year                                                                                     |
| NEE_VUT_REF_NIGHT_JOINTUNC |                                                   | Joint uncertainty estimation for NEE_VUT_REF_NIGHT, including random uncertainty and USTAR filtering uncertainty                                                                                                              |
| HH                         |                                                   | not available                                                                                                                                                                                                                 |
| DD                         | $\mu\text{molCO}_2 \text{ m}^{-2} \text{ s}^{-1}$ | $[\text{SQRT}(\text{NEE\_VUT\_REF\_NIGHT\_RANDUNC}^2 + ((\text{NEE\_VUT\_84\_NIGHT} - \text{NEE\_VUT\_16\_NIGHT}) / 2)^2)]$ for each day                                                                                      |
| WW                         | $\mu\text{molCO}_2 \text{ m}^{-2} \text{ s}^{-1}$ | $[\text{SQRT}(\text{NEE\_VUT\_REF\_NIGHT\_RANDUNC}^2 + ((\text{NEE\_VUT\_84\_NIGHT} - \text{NEE\_VUT\_16\_NIGHT}) / 2)^2)]$ for each week                                                                                     |



The FLUXNET2015 dataset and the ONEFlux processing pipeline for eddy covariance data  
 Supplementary Materials, Table SM1

|                    |       |                                                   |                                                                                                                                            |
|--------------------|-------|---------------------------------------------------|--------------------------------------------------------------------------------------------------------------------------------------------|
|                    | MM    | $\mu\text{molCO}_2 \text{ m}^{-2} \text{ s}^{-1}$ | $[\text{SQRT}(\text{NEE\_VUT\_REF\_NIGHT\_RANDUNC}^2 + ((\text{NEE\_VUT\_84\_NIGHT} - \text{NEE\_VUT\_16\_NIGHT}) / 2)^2)]$ for each month |
|                    | YY    | $\mu\text{molCO}_2 \text{ m}^{-2} \text{ s}^{-1}$ | $[\text{SQRT}(\text{NEE\_VUT\_REF\_NIGHT\_RANDUNC}^2 + ((\text{NEE\_VUT\_84\_NIGHT} - \text{NEE\_VUT\_16\_NIGHT}) / 2)^2)]$ for each year  |
| NEE_CUT_REF_DAY    |       |                                                   | Average daytime NEE, from NEE_CUT_REF                                                                                                      |
|                    | HH    |                                                   | not available                                                                                                                              |
|                    | DD    | $\mu\text{molCO}_2 \text{ m}^{-2} \text{ s}^{-1}$ | average from half-hourly data (where NIGHT is 0)                                                                                           |
|                    | WW-YY | $\mu\text{molCO}_2 \text{ m}^{-2} \text{ s}^{-1}$ | average from daily data                                                                                                                    |
| NEE_VUT_REF_DAY    |       |                                                   | Average daytime NEE, from NEE_VUT_REF                                                                                                      |
|                    | HH    |                                                   | not available                                                                                                                              |
|                    | DD    | $\mu\text{molCO}_2 \text{ m}^{-2} \text{ s}^{-1}$ | average from half-hourly data (where NIGHT is 0)                                                                                           |
|                    | WW-YY | $\mu\text{molCO}_2 \text{ m}^{-2} \text{ s}^{-1}$ | average from daily data                                                                                                                    |
| NEE_CUT_REF_DAY_SD |       |                                                   | Standard Deviation of the daytime NEE, from the NEE_CUT_REF                                                                                |
|                    | HH    |                                                   | not available                                                                                                                              |
|                    | DD    | $\mu\text{molCO}_2 \text{ m}^{-2} \text{ s}^{-1}$ | from half-hourly data (where NIGHT is 0)                                                                                                   |
|                    | WW-YY | $\mu\text{molCO}_2 \text{ m}^{-2} \text{ s}^{-1}$ | from daily data                                                                                                                            |
| NEE_VUT_REF_DAY_SD |       |                                                   | Standard Deviation of the daytime NEE, from the NEE_VUT_REF                                                                                |
|                    | HH    |                                                   | not available                                                                                                                              |
|                    | DD    | $\mu\text{molCO}_2 \text{ m}^{-2} \text{ s}^{-1}$ | from half-hourly data (where NIGHT is 0)                                                                                                   |
|                    | WW-YY | $\mu\text{molCO}_2 \text{ m}^{-2} \text{ s}^{-1}$ | from daily data                                                                                                                            |
| NEE_CUT_REF_DAY_QC |       |                                                   | Quality flag for NEE_CUT_REF_DAY                                                                                                           |
|                    | HH    |                                                   | not available                                                                                                                              |
|                    | DD    | nondimensional                                    | fraction between 0-1, indicating percentage of measured and good quality gapfill data                                                      |
|                    | WW-YY | nondimensional                                    | fraction between 0-1, indicating percentage of measured and good quality gapfill data (average from daily data)                            |
| NEE_VUT_REF_DAY_QC |       |                                                   | Quality flag for NEE_VUT_REF_DAY                                                                                                           |
|                    | HH    |                                                   | not available                                                                                                                              |

The FLUXNET2015 dataset and the ONEFlux processing pipeline for eddy covariance data  
 Supplementary Materials, Table SM1

|                          |                                                   |                                                                                                                                                                                                                                    |
|--------------------------|---------------------------------------------------|------------------------------------------------------------------------------------------------------------------------------------------------------------------------------------------------------------------------------------|
| DD                       | nondimensional                                    | fraction between 0-1, indicating percentage of measured and good quality gapfill data                                                                                                                                              |
| WW-YY                    | nondimensional                                    | fraction between 0-1, indicating percentage of measured and good quality gapfill data (average from daily data)                                                                                                                    |
| NEE_CUT_REF_DAY_RANDUNC  |                                                   | Random uncertainty of NEE_CUT_REF_DAY, from the random uncertainty of the single daytime half-hours                                                                                                                                |
| HH                       |                                                   | not available                                                                                                                                                                                                                      |
| DD-YY                    | $\mu\text{molCO}_2 \text{ m}^{-2} \text{ s}^{-1}$ | from random uncertainty of individual half-hours where NIGHT is 0 ( $\text{rand}(i) = [\text{SQRT}(\text{SUM}(\text{rand}(i)^2)) / n]$ , where n is the number of half-hours used to calculate the daytime aggregation in the day. |
| NEE_VUT_REF_DAY_RANDUNC  |                                                   | Random uncertainty of NEE_VUT_REF_DAY, from the random uncertainty of the single daytime half-hours                                                                                                                                |
| HH                       |                                                   | not available                                                                                                                                                                                                                      |
| DD-YY                    | $\mu\text{molCO}_2 \text{ m}^{-2} \text{ s}^{-1}$ | from random uncertainty of individual half-hours where NIGHT is 0 ( $\text{rand}(i) = [\text{SQRT}(\text{SUM}(\text{rand}(i)^2)) / n]$ , where n is the number of half-hours used to calculate the daytime aggregation in the day. |
| NEE_CUT_REF_DAY_JOINTUNC |                                                   | Joint uncertainty estimation for NEE_CUT_REF_DAY, including random uncertainty and USTAR filtering uncertainty                                                                                                                     |
| HH                       |                                                   | not available                                                                                                                                                                                                                      |
| DD                       | $\mu\text{molCO}_2 \text{ m}^{-2} \text{ s}^{-1}$ | $[\text{SQRT}(\text{NEE\_CUT\_REF\_DAY\_RANDUNC}^2 + ((\text{NEE\_CUT\_84\_DAY} - \text{NEE\_CUT\_16\_DAY}) / 2)^2)]$ for each day                                                                                                 |
| WW                       | $\mu\text{molCO}_2 \text{ m}^{-2} \text{ s}^{-1}$ | $[\text{SQRT}(\text{NEE\_CUT\_REF\_DAY\_RANDUNC}^2 + ((\text{NEE\_CUT\_84\_DAY} - \text{NEE\_CUT\_16\_DAY}) / 2)^2)]$ for each week                                                                                                |
| MM                       | $\mu\text{molCO}_2 \text{ m}^{-2} \text{ s}^{-1}$ | $[\text{SQRT}(\text{NEE\_CUT\_REF\_DAY\_RANDUNC}^2 + ((\text{NEE\_CUT\_84\_DAY} - \text{NEE\_CUT\_16\_DAY}) / 2)^2)]$ for each month                                                                                               |
| YY                       | $\mu\text{molCO}_2 \text{ m}^{-2} \text{ s}^{-1}$ | $[\text{SQRT}(\text{NEE\_CUT\_REF\_DAY\_RANDUNC}^2 + ((\text{NEE\_CUT\_84\_DAY} - \text{NEE\_CUT\_16\_DAY}) / 2)^2)]$ for each year                                                                                                |

The FLUXNET2015 dataset and the ONEFlux processing pipeline for eddy covariance data  
 Supplementary Materials, Table SM1

|                          |                                                   |                                                                                                                                      |
|--------------------------|---------------------------------------------------|--------------------------------------------------------------------------------------------------------------------------------------|
| NEE_VUT_REF_DAY_JOINTUNC |                                                   | Joint uncertainty estimation for NEE_VUT_REF_DAY, including random uncertainty and USTAR filtering uncertainty                       |
| HH                       |                                                   | not available                                                                                                                        |
| DD                       | $\mu\text{molCO}_2 \text{ m}^{-2} \text{ s}^{-1}$ | $[\text{SQRT}(\text{NEE\_VUT\_REF\_DAY\_RANDUNC}^2 + ((\text{NEE\_VUT\_84\_DAY} - \text{NEE\_VUT\_16\_DAY}) / 2)^2)]$ for each day   |
| WW                       | $\mu\text{molCO}_2 \text{ m}^{-2} \text{ s}^{-1}$ | $[\text{SQRT}(\text{NEE\_VUT\_REF\_DAY\_RANDUNC}^2 + ((\text{NEE\_VUT\_84\_DAY} - \text{NEE\_VUT\_16\_DAY}) / 2)^2)]$ for each week  |
| MM                       | $\mu\text{molCO}_2 \text{ m}^{-2} \text{ s}^{-1}$ | $[\text{SQRT}(\text{NEE\_VUT\_REF\_DAY\_RANDUNC}^2 + ((\text{NEE\_VUT\_84\_DAY} - \text{NEE\_VUT\_16\_DAY}) / 2)^2)]$ for each month |
| YY                       | $\mu\text{molCO}_2 \text{ m}^{-2} \text{ s}^{-1}$ | $[\text{SQRT}(\text{NEE\_VUT\_REF\_DAY\_RANDUNC}^2 + ((\text{NEE\_VUT\_84\_DAY} - \text{NEE\_VUT\_16\_DAY}) / 2)^2)]$ for each year  |
| NEE_CUT_USTAR50_NIGHT    |                                                   | Average nighttime NEE, from NEE_CUT_USTAR50                                                                                          |
| HH                       |                                                   | not available                                                                                                                        |
| DD                       | $\mu\text{molCO}_2 \text{ m}^{-2} \text{ s}^{-1}$ | average from half-hourly data (where NIGHT is 1)                                                                                     |
| WW-YY                    | $\mu\text{molCO}_2 \text{ m}^{-2} \text{ s}^{-1}$ | average from daily data                                                                                                              |
| NEE_VUT_USTAR50_NIGHT    |                                                   | Average nighttime NEE, from NEE_VUT_USTAR50                                                                                          |
| HH                       |                                                   | not available                                                                                                                        |
| DD                       | $\mu\text{molCO}_2 \text{ m}^{-2} \text{ s}^{-1}$ | average from half-hourly data (where NIGHT is 1)                                                                                     |
| WW-YY                    | $\mu\text{molCO}_2 \text{ m}^{-2} \text{ s}^{-1}$ | average from daily data                                                                                                              |
| NEE_CUT_USTAR50_NIGHT_SD |                                                   | Standard Deviation of the nighttime NEE, from the NEE_CUT_USTAR50                                                                    |
| HH                       |                                                   | not available                                                                                                                        |
| DD                       | $\mu\text{molCO}_2 \text{ m}^{-2} \text{ s}^{-1}$ | from half-hourly data (where NIGHT is 1)                                                                                             |
| WW-YY                    | $\mu\text{molCO}_2 \text{ m}^{-2} \text{ s}^{-1}$ | from daily data                                                                                                                      |
| NEE_VUT_USTAR50_NIGHT_SD |                                                   | Standard Deviation of the nighttime NEE, from the NEE_VUT_USTAR50                                                                    |
| HH                       |                                                   | not available                                                                                                                        |
| DD                       | $\mu\text{molCO}_2 \text{ m}^{-2} \text{ s}^{-1}$ | from half-hourly data (where NIGHT is 1)                                                                                             |
| WW-YY                    | $\mu\text{molCO}_2 \text{ m}^{-2} \text{ s}^{-1}$ | from daily data                                                                                                                      |

The FLUXNET2015 dataset and the ONEFlux processing pipeline for eddy covariance data  
 Supplementary Materials, Table SM1

|                                    |                                                   |                                                                                                                                                                                                                                                    |
|------------------------------------|---------------------------------------------------|----------------------------------------------------------------------------------------------------------------------------------------------------------------------------------------------------------------------------------------------------|
| NEE_CUT_USTAR50_NIGHT_QC           |                                                   | Quality flag for<br>NEE_CUT_USTAR50_NIGHT                                                                                                                                                                                                          |
| HH                                 |                                                   | not available                                                                                                                                                                                                                                      |
| DD                                 | nondimensional                                    | fraction between 0-1, indicating percentage<br>of measured and good quality gapfill data                                                                                                                                                           |
| WW-YY                              | nondimensional                                    | fraction between 0-1, indicating percentage<br>of measured and good quality gapfill data<br>(average from daily data)                                                                                                                              |
| NEE_VUT_USTAR50_NIGHT_QC           |                                                   | Quality flag for<br>NEE_VUT_USTAR50_NIGHT                                                                                                                                                                                                          |
| HH                                 |                                                   | not available                                                                                                                                                                                                                                      |
| DD                                 | nondimensional                                    | fraction between 0-1, indicating percentage<br>of measured and good quality gapfill data                                                                                                                                                           |
| WW-YY                              | nondimensional                                    | fraction between 0-1, indicating percentage<br>of measured and good quality gapfill data<br>(average from daily data)                                                                                                                              |
| NEE_CUT_USTAR50_NIGHT_RA<br>NDUNC  |                                                   | Random uncertainty of<br>NEE_CUT_USTAR50_NIGHT, from the<br>random uncertainty of the single nighttime<br>half-hours                                                                                                                               |
| HH                                 |                                                   | not available                                                                                                                                                                                                                                      |
| DD-YY                              | $\mu\text{molCO}_2 \text{ m}^{-2} \text{ s}^{-1}$ | from random uncertainty of individual<br>half-hours where NIGHT is 1 ( $\text{rand}(i) =$<br>$[\text{SQRT}(\text{SUM}(\text{rand}(i)^2)) / n]$ , where n is the<br>number of half-hours used to calculate the<br>nighttime aggregation in the day. |
| NEE_VUT_USTAR50_NIGHT_RA<br>NDUNC  |                                                   | Random uncertainty of<br>NEE_VUT_USTAR50_NIGHT, from the<br>random uncertainty of the single nighttime<br>half-hours                                                                                                                               |
| HH                                 |                                                   | not available                                                                                                                                                                                                                                      |
| DD-YY                              | $\mu\text{molCO}_2 \text{ m}^{-2} \text{ s}^{-1}$ | from random uncertainty of individual<br>half-hours where NIGHT is 1 ( $\text{rand}(i) =$<br>$[\text{SQRT}(\text{SUM}(\text{rand}(i)^2)) / n]$ , where n is the<br>number of half-hours used to calculate the<br>nighttime aggregation in the day. |
| NEE_CUT_USTAR50_NIGHT_JOI<br>NTUNC |                                                   | Joint uncertainty estimation for<br>NEE_CUT_USTAR50_NIGHT, including<br>random uncertainty and USTAR filtering<br>uncertainty                                                                                                                      |
| HH                                 |                                                   | not available                                                                                                                                                                                                                                      |

The FLUXNET2015 dataset and the ONEFlux processing pipeline for eddy covariance data  
 Supplementary Materials, Table SM1

|                                    |                                                   |                                                                                                                      |
|------------------------------------|---------------------------------------------------|----------------------------------------------------------------------------------------------------------------------|
|                                    |                                                   | [SQRT(NEE_CUT_USTAR50_NIGHT_RAN DUNC^2 + ((NEE_CUT_84_NIGHT - NEE_CUT_16_NIGHT) / 2)^2)] for each day                |
| DD                                 | $\mu\text{molCO}_2 \text{ m}^{-2} \text{ s}^{-1}$ |                                                                                                                      |
|                                    |                                                   | [SQRT(NEE_CUT_USTAR50_NIGHT_RAN DUNC^2 + ((NEE_CUT_84_NIGHT - NEE_CUT_16_NIGHT) / 2)^2)] for each week               |
| WW                                 | $\mu\text{molCO}_2 \text{ m}^{-2} \text{ s}^{-1}$ |                                                                                                                      |
|                                    |                                                   | [SQRT(NEE_CUT_USTAR50_NIGHT_RAN DUNC^2 + ((NEE_CUT_84_NIGHT - NEE_CUT_16_NIGHT) / 2)^2)] for each month              |
| MM                                 | $\mu\text{molCO}_2 \text{ m}^{-2} \text{ s}^{-1}$ |                                                                                                                      |
|                                    |                                                   | [SQRT(NEE_CUT_USTAR50_NIGHT_RAN DUNC^2 + ((NEE_CUT_84_NIGHT - NEE_CUT_16_NIGHT) / 2)^2)] for each year               |
| YY                                 | $\mu\text{molCO}_2 \text{ m}^{-2} \text{ s}^{-1}$ |                                                                                                                      |
| NEE_VUT_USTAR50_NIGHT_JOI<br>NTUNC |                                                   | Joint uncertainty estimation for NEE_VUT_USTAR50_NIGHT, including random uncertainty and USTAR filtering uncertainty |
| HH                                 |                                                   | not available                                                                                                        |
|                                    |                                                   | [SQRT(NEE_VUT_USTAR50_NIGHT_RAN DUNC^2 + ((NEE_VUT_84_NIGHT - NEE_VUT_16_NIGHT) / 2)^2)] for each day                |
| DD                                 | $\mu\text{molCO}_2 \text{ m}^{-2} \text{ s}^{-1}$ |                                                                                                                      |
|                                    |                                                   | [SQRT(NEE_VUT_USTAR50_NIGHT_RAN DUNC^2 + ((NEE_VUT_84_NIGHT - NEE_VUT_16_NIGHT) / 2)^2)] for each week               |
| WW                                 | $\mu\text{molCO}_2 \text{ m}^{-2} \text{ s}^{-1}$ |                                                                                                                      |
|                                    |                                                   | [SQRT(NEE_VUT_USTAR50_NIGHT_RAN DUNC^2 + ((NEE_VUT_84_NIGHT - NEE_VUT_16_NIGHT) / 2)^2)] for each month              |
| MM                                 | $\mu\text{molCO}_2 \text{ m}^{-2} \text{ s}^{-1}$ |                                                                                                                      |
|                                    |                                                   | [SQRT(NEE_VUT_USTAR50_NIGHT_RAN DUNC^2 + ((NEE_VUT_84_NIGHT - NEE_VUT_16_NIGHT) / 2)^2)] for each year               |
| YY                                 | $\mu\text{molCO}_2 \text{ m}^{-2} \text{ s}^{-1}$ |                                                                                                                      |
| NEE_CUT_USTAR50_DAY                |                                                   | Average daytime NEE, from NEE_CUT_USTAR50                                                                            |
| HH                                 |                                                   | not available                                                                                                        |
|                                    |                                                   | average from half-hourly data (where NIGHT is 0)                                                                     |
| DD                                 | $\mu\text{molCO}_2 \text{ m}^{-2} \text{ s}^{-1}$ |                                                                                                                      |
| WW-YY                              | $\mu\text{molCO}_2 \text{ m}^{-2} \text{ s}^{-1}$ | average from daily data                                                                                              |
| NEE_VUT_USTAR50_DAY                |                                                   | Average daytime NEE, from NEE_VUT_USTAR50                                                                            |

The FLUXNET2015 dataset and the ONEFlux processing pipeline for eddy covariance data  
 Supplementary Materials, Table SM1

|                                 |       |                                                   |                                                                                                                                                                                                                                    |
|---------------------------------|-------|---------------------------------------------------|------------------------------------------------------------------------------------------------------------------------------------------------------------------------------------------------------------------------------------|
|                                 | HH    |                                                   | not available                                                                                                                                                                                                                      |
|                                 | DD    | $\mu\text{molCO}_2 \text{ m}^{-2} \text{ s}^{-1}$ | average from half-hourly data (where NIGHT is 0)                                                                                                                                                                                   |
|                                 | WW-YY | $\mu\text{molCO}_2 \text{ m}^{-2} \text{ s}^{-1}$ | average from daily data                                                                                                                                                                                                            |
| NEE_CUT_USTAR50_DAY_SD          |       |                                                   | Standard Deviation of the daytime NEE, from the NEE_CUT_USTAR50                                                                                                                                                                    |
|                                 | HH    |                                                   | not available                                                                                                                                                                                                                      |
|                                 | DD    | $\mu\text{molCO}_2 \text{ m}^{-2} \text{ s}^{-1}$ | from half-hourly data (where NIGHT is 0)                                                                                                                                                                                           |
|                                 | WW-YY | $\mu\text{molCO}_2 \text{ m}^{-2} \text{ s}^{-1}$ | from daily data                                                                                                                                                                                                                    |
| NEE_VUT_USTAR50_DAY_SD          |       |                                                   | Standard Deviation of the daytime NEE, from the NEE_VUT_USTAR50                                                                                                                                                                    |
|                                 | HH    |                                                   | not available                                                                                                                                                                                                                      |
|                                 | DD    | $\mu\text{molCO}_2 \text{ m}^{-2} \text{ s}^{-1}$ | from half-hourly data (where NIGHT is 0)                                                                                                                                                                                           |
|                                 | WW-YY | $\mu\text{molCO}_2 \text{ m}^{-2} \text{ s}^{-1}$ | from daily data                                                                                                                                                                                                                    |
| NEE_CUT_USTAR50_DAY_QC          |       |                                                   | Quality flag for NEE_CUT_USTAR50_DAY                                                                                                                                                                                               |
|                                 | HH    |                                                   | not available                                                                                                                                                                                                                      |
|                                 | DD    | nondimensional                                    | fraction between 0-1, indicating percentage of measured and good quality gapfill data                                                                                                                                              |
|                                 | WW-YY | nondimensional                                    | fraction between 0-1, indicating percentage of measured and good quality gapfill data (average from daily data)                                                                                                                    |
| NEE_VUT_USTAR50_DAY_QC          |       |                                                   | Quality flag for NEE_VUT_USTAR50_DAY                                                                                                                                                                                               |
|                                 | HH    |                                                   | not available                                                                                                                                                                                                                      |
|                                 | DD    | nondimensional                                    | fraction between 0-1, indicating percentage of measured and good quality gapfill data                                                                                                                                              |
|                                 | WW-YY | nondimensional                                    | fraction between 0-1, indicating percentage of measured and good quality gapfill data (average from daily data)                                                                                                                    |
| NEE_CUT_USTAR50_DAY_RAN<br>DUNC |       |                                                   | Random uncertainty of NEE_CUT_USTAR50_DAY, from the random uncertainty of the single daytime half-hours                                                                                                                            |
|                                 | HH    |                                                   | not available                                                                                                                                                                                                                      |
|                                 | DD-YY | $\mu\text{molCO}_2 \text{ m}^{-2} \text{ s}^{-1}$ | from random uncertainty of individual half-hours where NIGHT is 0 ( $\text{rand}(i) = [\text{SQRT}(\text{SUM}(\text{rand}(i)^2)) / n]$ , where n is the number of half-hours used to calculate the daytime aggregation in the day. |

The FLUXNET2015 dataset and the ONEFlux processing pipeline for eddy covariance data  
Supplementary Materials, Table SM1

|                                  |                                                   |                                                                                                                                                                                                                                                  |
|----------------------------------|---------------------------------------------------|--------------------------------------------------------------------------------------------------------------------------------------------------------------------------------------------------------------------------------------------------|
| NEE_VUT_USTAR50_DAY_RAN<br>DUNC  |                                                   | Random uncertainty of<br>NEE_VUT_USTAR50_DAY, from the<br>random uncertainty of the single daytime<br>half-hours                                                                                                                                 |
| HH                               |                                                   | not available                                                                                                                                                                                                                                    |
| DD-YY                            | $\mu\text{molCO}_2 \text{ m}^{-2} \text{ s}^{-1}$ | from random uncertainty of individual<br>half-hours where NIGHT is 0 ( $\text{rand}(i) =$<br>$[\text{SQRT}(\text{SUM}(\text{rand}(i)^2)) / n]$ , where n is the<br>number of half-hours used to calculate the<br>daytime aggregation in the day. |
| NEE_CUT_USTAR50_DAY_JOIN<br>TUNC |                                                   | Joint uncertainty estimation for<br>NEE_CUT_USTAR50_DAY, including<br>random uncertainty and USTAR filtering<br>uncertainty                                                                                                                      |
| HH                               |                                                   | not available                                                                                                                                                                                                                                    |
| DD                               | $\mu\text{molCO}_2 \text{ m}^{-2} \text{ s}^{-1}$ | $[\text{SQRT}(\text{NEE\_CUT\_USTAR50\_DAY\_RANDU}$<br>$\text{NC}^2 + ((\text{NEE\_CUT\_84\_DAY} -$<br>$\text{NEE\_CUT\_16\_DAY}) / 2)^2)]$ for each day                                                                                         |
| WW                               | $\mu\text{molCO}_2 \text{ m}^{-2} \text{ s}^{-1}$ | $[\text{SQRT}(\text{NEE\_CUT\_USTAR50\_DAY\_RANDU}$<br>$\text{NC}^2 + ((\text{NEE\_CUT\_84\_DAY} -$<br>$\text{NEE\_CUT\_16\_DAY}) / 2)^2)]$ for each week                                                                                        |
| MM                               | $\mu\text{molCO}_2 \text{ m}^{-2} \text{ s}^{-1}$ | $[\text{SQRT}(\text{NEE\_CUT\_USTAR50\_DAY\_RANDU}$<br>$\text{NC}^2 + ((\text{NEE\_CUT\_84\_DAY} -$<br>$\text{NEE\_CUT\_16\_DAY}) / 2)^2)]$ for each month                                                                                       |
| YY                               | $\mu\text{molCO}_2 \text{ m}^{-2} \text{ s}^{-1}$ | $[\text{SQRT}(\text{NEE\_CUT\_USTAR50\_DAY\_RANDU}$<br>$\text{NC}^2 + ((\text{NEE\_CUT\_84\_DAY} -$<br>$\text{NEE\_CUT\_16\_DAY}) / 2)^2)]$ for each year                                                                                        |
| NEE_VUT_USTAR50_DAY_JOIN<br>TUNC |                                                   | Joint uncertainty estimation for<br>NEE_VUT_USTAR50_DAY, including<br>random uncertainty and USTAR filtering<br>uncertainty                                                                                                                      |
| HH                               |                                                   | not available                                                                                                                                                                                                                                    |
| DD                               | $\mu\text{molCO}_2 \text{ m}^{-2} \text{ s}^{-1}$ | $\text{SQRT}(\text{NEE\_VUT\_USTAR50\_DAY\_RANDU}$<br>$\text{NC}^2 + ((\text{NEE\_VUT\_84\_DAY} -$<br>$\text{NEE\_VUT\_16\_DAY}) / 2)^2)$ for each day                                                                                           |
| WW                               | $\mu\text{molCO}_2 \text{ m}^{-2} \text{ s}^{-1}$ | $\text{SQRT}(\text{NEE\_VUT\_USTAR50\_DAY\_RANDU}$<br>$\text{NC}^2 + ((\text{NEE\_VUT\_84\_DAY} -$<br>$\text{NEE\_VUT\_16\_DAY}) / 2)^2)$ for each week                                                                                          |
| MM                               | $\mu\text{molCO}_2 \text{ m}^{-2} \text{ s}^{-1}$ | $\text{SQRT}(\text{NEE\_VUT\_USTAR50\_DAY\_RANDU}$<br>$\text{NC}^2 + ((\text{NEE\_VUT\_84\_DAY} -$<br>$\text{NEE\_VUT\_16\_DAY}) / 2)^2)$ for each month                                                                                         |

The FLUXNET2015 dataset and the ONEFlux processing pipeline for eddy covariance data  
 Supplementary Materials, Table SM1

|                     |       |                                                   |                                                                                                                                                                                               |
|---------------------|-------|---------------------------------------------------|-----------------------------------------------------------------------------------------------------------------------------------------------------------------------------------------------|
|                     | YY    | $\mu\text{molCO}_2 \text{ m}^{-2} \text{ s}^{-1}$ | $\text{SQRT}(\text{NEE\_VUT\_USTAR50\_DAY\_RANDU\_NC}^2 + ((\text{NEE\_VUT\_84\_DAY} - \text{NEE\_VUT\_16\_DAY}) / 2)^2)$ for each year                                                       |
| NEE_CUT_XX_NIGHT    |       |                                                   | NEE CUT nighttime percentiles (approx. percentile indicated by XX, see doc.) calculated from the 40 estimates aggregated at the different time resolutions -- XX = 05, 16, 25, 50, 75, 84, 95 |
|                     | HH    |                                                   | not available                                                                                                                                                                                 |
|                     | DD    | $\mu\text{molCO}_2 \text{ m}^{-2} \text{ s}^{-1}$ | XXth nighttime percentile from 40 daily NEE_CUT_XX_NIGHT                                                                                                                                      |
|                     | WW    | $\mu\text{molCO}_2 \text{ m}^{-2} \text{ s}^{-1}$ | XXth nighttime percentile from 40 weekly NEE_CUT_XX_NIGHT                                                                                                                                     |
|                     | MM    | $\mu\text{molCO}_2 \text{ m}^{-2} \text{ s}^{-1}$ | XXth nighttime percentile from 40 monthly NEE_CUT_XX_NIGHT                                                                                                                                    |
|                     | YY    | $\mu\text{molCO}_2 \text{ m}^{-2} \text{ s}^{-1}$ | XXth nighttime percentile from 40 yearly NEE_CUT_XX_NIGHT                                                                                                                                     |
| NEE_VUT_XX_NIGHT    |       |                                                   | NEE VUT nighttime percentiles (approx. percentile indicated by XX, see doc.) calculated from the 40 estimates aggregated at the different time resolutions -- XX = 05, 16, 25, 50, 75, 84, 95 |
|                     | HH    |                                                   | not available                                                                                                                                                                                 |
|                     | DD    | $\mu\text{molCO}_2 \text{ m}^{-2} \text{ s}^{-1}$ | XXth nighttime percentile from 40 daily NEE_VUT_XX_NIGHT                                                                                                                                      |
|                     | WW    | $\mu\text{molCO}_2 \text{ m}^{-2} \text{ s}^{-1}$ | XXth nighttime percentile from 40 weekly NEE_VUT_XX_NIGHT                                                                                                                                     |
|                     | MM    | $\mu\text{molCO}_2 \text{ m}^{-2} \text{ s}^{-1}$ | XXth nighttime percentile from 40 monthly NEE_VUT_XX_NIGHT                                                                                                                                    |
|                     | YY    | $\mu\text{molCO}_2 \text{ m}^{-2} \text{ s}^{-1}$ | XXth nighttime percentile from 40 yearly NEE_VUT_XX_NIGHT                                                                                                                                     |
| NEE_CUT_XX_NIGHT_QC |       |                                                   | Quality flag for NEE_CUT_XX_NIGHT -- XX = 05, 16, 25, 50, 75, 84, 95                                                                                                                          |
|                     | HH    |                                                   | not available                                                                                                                                                                                 |
|                     | DD    | nondimensional                                    | fraction between 0-1, indicating percentage of measured and good quality gapfill data                                                                                                         |
|                     | WW-YY | nondimensional                                    | fraction between 0-1, indicating percentage of measured and good quality gapfill data (average from daily data)                                                                               |



The FLUXNET2015 dataset and the ONEFlux processing pipeline for eddy covariance data  
 Supplementary Materials, Table SM1

|                     |                                                   |                                                                                                                                                                                             |
|---------------------|---------------------------------------------------|---------------------------------------------------------------------------------------------------------------------------------------------------------------------------------------------|
| NEE_VUT_XX_NIGHT_QC |                                                   | Quality flag for NEE_VUT_XX_NIGHT -- XX = 05, 16, 25, 50, 75, 84, 95                                                                                                                        |
| HH                  |                                                   | not available                                                                                                                                                                               |
| DD                  | nondimensional                                    | fraction between 0-1, indicating percentage of measured and good quality gapfill data                                                                                                       |
| WW-YY               | nondimensional                                    | fraction between 0-1, indicating percentage of measured and good quality gapfill data (average from daily data)                                                                             |
| NEE_CUT_XX_DAY      |                                                   | NEE CUT daytime percentiles (approx. percentile indicated by XX, see doc.) calculated from the 40 estimates aggregated at the different time resolutions -- XX = 05, 16, 25, 50, 75, 84, 95 |
| HH                  |                                                   | not available                                                                                                                                                                               |
| DD                  | $\mu\text{molCO}_2 \text{ m}^{-2} \text{ s}^{-1}$ | XXth daytime percentile from 40 daily NEE_CUT_XX_DAY                                                                                                                                        |
| WW                  | $\mu\text{molCO}_2 \text{ m}^{-2} \text{ s}^{-1}$ | XXth daytime percentile from 40 weekly NEE_CUT_XX_DAY                                                                                                                                       |
| MM                  | $\mu\text{molCO}_2 \text{ m}^{-2} \text{ s}^{-1}$ | XXth daytime percentile from 40 monthly NEE_CUT_XX_DAY                                                                                                                                      |
| YY                  | $\mu\text{molCO}_2 \text{ m}^{-2} \text{ s}^{-1}$ | XXth daytime percentile from 40 yearly NEE_CUT_XX_DAY                                                                                                                                       |
| NEE_VUT_XX_DAY      |                                                   | NEE VUT daytime percentiles (approx. percentile indicated by XX, see doc.) calculated from the 40 estimates aggregated at the different time resolutions -- XX = 05, 16, 25, 50, 75, 84, 95 |
| HH                  |                                                   | not available                                                                                                                                                                               |
| DD                  | $\mu\text{molCO}_2 \text{ m}^{-2} \text{ s}^{-1}$ | XXth daytime percentile from 40 daily NEE_VUT_XX_DAY                                                                                                                                        |
| WW                  | $\mu\text{molCO}_2 \text{ m}^{-2} \text{ s}^{-1}$ | XXth daytime percentile from 40 weekly NEE_VUT_XX_DAY                                                                                                                                       |
| MM                  | $\mu\text{molCO}_2 \text{ m}^{-2} \text{ s}^{-1}$ | XXth daytime percentile from 40 monthly NEE_VUT_XX_DAY                                                                                                                                      |
| YY                  | $\mu\text{molCO}_2 \text{ m}^{-2} \text{ s}^{-1}$ | XXth daytime percentile from 40 yearly NEE_VUT_XX_DAY                                                                                                                                       |
| NEE_CUT_XX_DAY_QC   |                                                   | Quality flag for NEE_CUT_XX_DAY -- XX = 05, 16, 25, 50, 75, 84, 95                                                                                                                          |
| HH                  |                                                   | not available                                                                                                                                                                               |

The FLUXNET2015 dataset and the ONEFlux processing pipeline for eddy covariance data  
 Supplementary Materials, Table SM1

|                                 |       |                                                   |                                                                                                                                                                                       |
|---------------------------------|-------|---------------------------------------------------|---------------------------------------------------------------------------------------------------------------------------------------------------------------------------------------|
|                                 | DD    | nondimensional                                    | fraction between 0-1, indicating percentage of measured and good quality gapfill data                                                                                                 |
|                                 | WW-YY | nondimensional                                    | fraction between 0-1, indicating percentage of measured and good quality gapfill data (average from daily data)                                                                       |
| NEE_VUT_XX_DAY_QC               |       |                                                   | Quality flag for NEE_VUT_XX_DAY -- XX = 05, 16, 25, 50, 75, 84, 95                                                                                                                    |
|                                 | HH    |                                                   | not available                                                                                                                                                                         |
|                                 | DD    | nondimensional                                    | fraction between 0-1, indicating percentage of measured and good quality gapfill data                                                                                                 |
|                                 | WW-YY | nondimensional                                    | fraction between 0-1, indicating percentage of measured and good quality gapfill data (average from daily data)                                                                       |
| <b>PARTITIONING - NIGHTTIME</b> |       |                                                   |                                                                                                                                                                                       |
| RECO_NT_VUT_REF                 |       |                                                   | Ecosystem Respiration, from Nighttime partitioning method, reference selected from RECO versions using model efficiency (MEF). The MEF analysis is repeated for each time aggregation |
|                                 | HH    | $\mu\text{molCO}_2 \text{ m}^{-2} \text{ s}^{-1}$ |                                                                                                                                                                                       |
|                                 | DD    | $\text{gC m}^{-2} \text{ d}^{-1}$                 | calculated from half-hourly data                                                                                                                                                      |
|                                 | WW-MM | $\text{gC m}^{-2} \text{ d}^{-1}$                 | average from daily data                                                                                                                                                               |
|                                 | YY    | $\text{gC m}^{-2} \text{ y}^{-1}$                 | sum from daily data                                                                                                                                                                   |
| RECO_NT_VUT_USTAR50             |       |                                                   | Ecosystem Respiration, from Nighttime partitioning method, based on NEE_VUT_USTAR50                                                                                                   |
|                                 | HH    | $\mu\text{molCO}_2 \text{ m}^{-2} \text{ s}^{-1}$ |                                                                                                                                                                                       |
|                                 | DD    | $\text{gC m}^{-2} \text{ d}^{-1}$                 | calculated from half-hourly data                                                                                                                                                      |
|                                 | WW-MM | $\text{gC m}^{-2} \text{ d}^{-1}$                 | average from daily data                                                                                                                                                               |
|                                 | YY    | $\text{gC m}^{-2} \text{ y}^{-1}$                 | sum from daily data                                                                                                                                                                   |
| RECO_NT_VUT_MEAN                |       |                                                   | Ecosystem Respiration, from Nighttime partitioning method, average from RECO versions, each from corresponding NEE_VUT_XX version                                                     |
|                                 | HH    | $\mu\text{molCO}_2 \text{ m}^{-2} \text{ s}^{-1}$ | average from 40 half-hourly RECO_NT_VUT_XX                                                                                                                                            |
|                                 | DD    | $\text{gC m}^{-2} \text{ d}^{-1}$                 | average from 40 daily RECO_NT_VUT_XX                                                                                                                                                  |

The FLUXNET2015 dataset and the ONEFlux processing pipeline for eddy covariance data  
 Supplementary Materials, Table SM1

|                     |       |                                                     |                                                                                                                                                                                       |
|---------------------|-------|-----------------------------------------------------|---------------------------------------------------------------------------------------------------------------------------------------------------------------------------------------|
|                     | WW    | gC m <sup>-2</sup> d <sup>-1</sup>                  | average from 40 weekly RECO_NT_VUT_XX                                                                                                                                                 |
|                     | MM    | gC m <sup>-2</sup> d <sup>-1</sup>                  | average from 40 monthly RECO_NT_VUT_XX                                                                                                                                                |
|                     | YY    | gC m <sup>-2</sup> y <sup>-1</sup>                  | average from 40 yearly RECO_NT_VUT_XX                                                                                                                                                 |
| RECO_NT_VUT_SE      |       |                                                     | Standard Error for Ecosystem Respiration, calculated as (SD(RECO_NT_VUT_XX) / SQRT(40))                                                                                               |
|                     | HH    | μmolCO <sub>2</sub> m <sup>-2</sup> s <sup>-1</sup> | SE from 40 half-hourly RECO_NT_CUT_XX                                                                                                                                                 |
|                     | DD    | gC m <sup>-2</sup> d <sup>-1</sup>                  | SE from 40 daily RECO_NT_VUT_XX                                                                                                                                                       |
|                     | WW    | gC m <sup>-2</sup> d <sup>-1</sup>                  | SE from 40 weekly RECO_NT_VUT_XX                                                                                                                                                      |
|                     | MM    | gC m <sup>-2</sup> d <sup>-1</sup>                  | SE from 40 monthly RECO_NT_VUT_XX                                                                                                                                                     |
|                     | YY    | gC m <sup>-2</sup> y <sup>-1</sup>                  | SE from 40 yearly RECO_NT_VUT_XX                                                                                                                                                      |
| RECO_NT_VUT_XX      |       |                                                     | Ecosystem Respiration, from Nighttime partitioning method (with XX = 05, 16, 25, 50, 75, 84, 95)                                                                                      |
|                     | HH    | μmolCO <sub>2</sub> m <sup>-2</sup> s <sup>-1</sup> |                                                                                                                                                                                       |
|                     | DD    | gC m <sup>-2</sup> d <sup>-1</sup>                  | calculated from half-hourly data                                                                                                                                                      |
|                     | WW-MM | gC m <sup>-2</sup> d <sup>-1</sup>                  | average from daily data                                                                                                                                                               |
|                     | YY    | gC m <sup>-2</sup> y <sup>-1</sup>                  | sum from daily data                                                                                                                                                                   |
| RECO_NT_CUT_REF     |       |                                                     | Ecosystem Respiration, from Nighttime partitioning method, reference selected from RECO versions using model efficiency (MEF). The MEF analysis is repeated for each time aggregation |
|                     | HH    | μmolCO <sub>2</sub> m <sup>-2</sup> s <sup>-1</sup> |                                                                                                                                                                                       |
|                     | DD    | gC m <sup>-2</sup> d <sup>-1</sup>                  | calculated from half-hourly data                                                                                                                                                      |
|                     | WW-MM | gC m <sup>-2</sup> d <sup>-1</sup>                  | average from daily data                                                                                                                                                               |
|                     | YY    | gC m <sup>-2</sup> y <sup>-1</sup>                  | sum from daily data                                                                                                                                                                   |
| RECO_NT_CUT_USTAR50 |       |                                                     | Ecosystem Respiration, from Nighttime partitioning method, based on NEE_CUT_USTAR50                                                                                                   |
|                     | HH    | μmolCO <sub>2</sub> m <sup>-2</sup> s <sup>-1</sup> |                                                                                                                                                                                       |
|                     | DD    | gC m <sup>-2</sup> d <sup>-1</sup>                  | calculated from half-hourly data                                                                                                                                                      |
|                     | WW-MM | gC m <sup>-2</sup> d <sup>-1</sup>                  | average from daily data                                                                                                                                                               |
|                     | YY    | gC m <sup>-2</sup> y <sup>-1</sup>                  | sum from daily data                                                                                                                                                                   |

The FLUXNET2015 dataset and the ONEFlux processing pipeline for eddy covariance data  
 Supplementary Materials, Table SM1

|                  |                                                   |                                                                                                                                                                                         |
|------------------|---------------------------------------------------|-----------------------------------------------------------------------------------------------------------------------------------------------------------------------------------------|
| RECO_NT_CUT_MEAN |                                                   | Ecosystem Respiration, from Nighttime partitioning method, average from RECO versions, each from corresponding NEE_CUT_XX version                                                       |
| HH               | $\mu\text{molCO}_2 \text{ m}^{-2} \text{ s}^{-1}$ | average from 40 half-hourly RECO_NT_CUT_XX                                                                                                                                              |
| DD               | $\text{gC m}^{-2} \text{ d}^{-1}$                 | average from 40 daily RECO_NT_CUT_XX                                                                                                                                                    |
| WW               | $\text{gC m}^{-2} \text{ d}^{-1}$                 | average from 40 weekly RECO_NT_CUT_XX                                                                                                                                                   |
| MM               | $\text{gC m}^{-2} \text{ d}^{-1}$                 | average from 40 monthly RECO_NT_CUT_XX                                                                                                                                                  |
| YY               | $\text{gC m}^{-2} \text{ y}^{-1}$                 | average from 40 yearly RECO_NT_CUT_XX                                                                                                                                                   |
| RECO_NT_CUT_SE   |                                                   | Standard Error for Ecosystem Respiration, calculated as $(\text{SD}(\text{RECO\_NT\_CUT\_XX}) / \text{SQRT}(40))$                                                                       |
| HH               | $\mu\text{molCO}_2 \text{ m}^{-2} \text{ s}^{-1}$ | SE from 40 half-hourly RECO_NT_CUT_XX                                                                                                                                                   |
| DD               | $\text{gC m}^{-2} \text{ d}^{-1}$                 | SE from 40 daily RECO_NT_CUT_XX                                                                                                                                                         |
| WW               | $\text{gC m}^{-2} \text{ d}^{-1}$                 | SE from 40 weekly RECO_NT_CUT_XX                                                                                                                                                        |
| MM               | $\text{gC m}^{-2} \text{ d}^{-1}$                 | SE from 40 monthly RECO_NT_CUT_XX                                                                                                                                                       |
| YY               | $\text{gC m}^{-2} \text{ y}^{-1}$                 | SE from 40 yearly RECO_NT_CUT_XX                                                                                                                                                        |
| RECO_NT_CUT_XX   |                                                   | Ecosystem Respiration, from Nighttime partitioning method (with XX = 05, 16, 25, 50, 75, 84, 95)                                                                                        |
| HH               | $\mu\text{molCO}_2 \text{ m}^{-2} \text{ s}^{-1}$ |                                                                                                                                                                                         |
| DD               | $\text{gC m}^{-2} \text{ d}^{-1}$                 | calculated from half-hourly data                                                                                                                                                        |
| WW-MM            | $\text{gC m}^{-2} \text{ d}^{-1}$                 | average from daily data                                                                                                                                                                 |
| YY               | $\text{gC m}^{-2} \text{ y}^{-1}$                 | sum from daily data                                                                                                                                                                     |
| GPP_NT_VUT_REF   |                                                   | Gross Primary Production, from Nighttime partitioning method, reference selected from GPP versions using model efficiency (MEF). The MEF analysis is repeated for each time aggregation |
| HH               | $\mu\text{molCO}_2 \text{ m}^{-2} \text{ s}^{-1}$ |                                                                                                                                                                                         |
| DD               | $\text{gC m}^{-2} \text{ d}^{-1}$                 | calculated from half-hourly data                                                                                                                                                        |
| WW-MM            | $\text{gC m}^{-2} \text{ d}^{-1}$                 | average from daily data                                                                                                                                                                 |
| YY               | $\text{gC m}^{-2} \text{ y}^{-1}$                 | sum from daily data                                                                                                                                                                     |

The FLUXNET2015 dataset and the ONEFlux processing pipeline for eddy covariance data  
 Supplementary Materials, Table SM1

|                    |       |                                                   |                                                                                                                                                                                         |
|--------------------|-------|---------------------------------------------------|-----------------------------------------------------------------------------------------------------------------------------------------------------------------------------------------|
| GPP_NT_VUT_USTAR50 |       |                                                   | Gross Primary Production, from Nighttime partitioning method, based on NEE_VUT_USTAR50                                                                                                  |
|                    | HH    | $\mu\text{molCO}_2 \text{ m}^{-2} \text{ s}^{-1}$ |                                                                                                                                                                                         |
|                    | DD    | $\text{gC m}^{-2} \text{ d}^{-1}$                 | calculated from half-hourly data                                                                                                                                                        |
|                    | WW-MM | $\text{gC m}^{-2} \text{ d}^{-1}$                 | average from daily data                                                                                                                                                                 |
|                    | YY    | $\text{gC m}^{-2} \text{ y}^{-1}$                 | sum from daily data                                                                                                                                                                     |
| GPP_NT_VUT_MEAN    |       |                                                   | Gross Primary Production, from Nighttime partitioning method, average from GPP versions, each from corresponding NEE_VUT_XX version                                                     |
|                    | HH    | $\mu\text{molCO}_2 \text{ m}^{-2} \text{ s}^{-1}$ | average from 40 half-hourly GPP_NT_VUT_XX                                                                                                                                               |
|                    | DD    | $\text{gC m}^{-2} \text{ d}^{-1}$                 | average from 40 daily GPP_NT_VUT_XX                                                                                                                                                     |
|                    | WW    | $\text{gC m}^{-2} \text{ d}^{-1}$                 | average from 40 weekly GPP_NT_VUT_XX                                                                                                                                                    |
|                    | MM    | $\text{gC m}^{-2} \text{ d}^{-1}$                 | average from 40 monthly GPP_NT_VUT_XX                                                                                                                                                   |
|                    | YY    | $\text{gC m}^{-2} \text{ y}^{-1}$                 | average from 40 yearly GPP_NT_VUT_XX                                                                                                                                                    |
| GPP_NT_VUT_SE      |       |                                                   | Standard Error for Gross Primary Production, calculated as $(\text{SD}(\text{GPP\_NT\_VUT\_XX}) / \text{SQRT}(40))$                                                                     |
|                    | HH    | $\mu\text{molCO}_2 \text{ m}^{-2} \text{ s}^{-1}$ | SE from 40 half-hourly GPP_NT_VUT_XX                                                                                                                                                    |
|                    | DD    | $\text{gC m}^{-2} \text{ d}^{-1}$                 | SE from 40 daily GPP_NT_VUT_XX                                                                                                                                                          |
|                    | WW    | $\text{gC m}^{-2} \text{ d}^{-1}$                 | SE from 40 weekly GPP_NT_VUT_XX                                                                                                                                                         |
|                    | MM    | $\text{gC m}^{-2} \text{ d}^{-1}$                 | SE from 40 monthly GPP_NT_VUT_XX                                                                                                                                                        |
|                    | YY    | $\text{gC m}^{-2} \text{ y}^{-1}$                 | SE from 40 yearly GPP_NT_VUT_XX                                                                                                                                                         |
| GPP_NT_VUT_XX      |       |                                                   | Gross Primary Production, from Nighttime partitioning method (with XX = 05, 16, 25, 50, 75, 84, 95)                                                                                     |
|                    | HH    | $\mu\text{molCO}_2 \text{ m}^{-2} \text{ s}^{-1}$ |                                                                                                                                                                                         |
|                    | DD    | $\text{gC m}^{-2} \text{ d}^{-1}$                 | calculated from half-hourly data                                                                                                                                                        |
|                    | WW-MM | $\text{gC m}^{-2} \text{ d}^{-1}$                 | average from daily data                                                                                                                                                                 |
|                    | YY    | $\text{gC m}^{-2} \text{ y}^{-1}$                 | sum from daily data                                                                                                                                                                     |
| GPP_NT_CUT_REF     |       |                                                   | Gross Primary Production, from Nighttime partitioning method, reference selected from GPP versions using model efficiency (MEF). The MEF analysis is repeated for each time aggregation |
|                    | HH    | $\mu\text{molCO}_2 \text{ m}^{-2} \text{ s}^{-1}$ |                                                                                                                                                                                         |

The FLUXNET2015 dataset and the ONEFlux processing pipeline for eddy covariance data  
 Supplementary Materials, Table SM1

|                               |       |                             |                                                                                                                                     |
|-------------------------------|-------|-----------------------------|-------------------------------------------------------------------------------------------------------------------------------------|
|                               | DD    | gC m-2 d-1                  | calculated from half-hourly data                                                                                                    |
|                               | WW-MM | gC m-2 d-1                  | average from daily data                                                                                                             |
|                               | YY    | gC m-2 y-1                  | sum from daily data                                                                                                                 |
| GPP_NT_CUT_USTAR50            |       |                             | Gross Primary Production, from Nighttime partitioning method, based on NEE_CUT_USTAR50                                              |
|                               | HH    | $\mu\text{molCO}_2$ m-2 s-1 |                                                                                                                                     |
|                               | DD    | gC m-2 d-1                  | calculated from half-hourly data                                                                                                    |
|                               | WW-MM | gC m-2 d-1                  | average from daily data                                                                                                             |
|                               | YY    | gC m-2 y-1                  | sum from daily data                                                                                                                 |
| GPP_NT_CUT_MEAN               |       |                             | Gross Primary Production, from Nighttime partitioning method, average from GPP versions, each from corresponding NEE_CUT_XX version |
|                               | HH    | $\mu\text{molCO}_2$ m-2 s-1 | average from 40 half-hourly GPP_NT_CUT_XX                                                                                           |
|                               | DD    | gC m-2 d-1                  | average from 40 daily GPP_NT_CUT_XX                                                                                                 |
|                               | WW    | gC m-2 d-1                  | average from 40 weekly GPP_NT_CUT_XX                                                                                                |
|                               | MM    | gC m-2 d-1                  | average from 40 monthly GPP_NT_CUT_XX                                                                                               |
|                               | YY    | gC m-2 y-1                  | average from 40 yearly GPP_NT_CUT_XX                                                                                                |
| GPP_NT_CUT_SE                 |       |                             | Standard Error for Gross Primary Production, calculated as $(\text{SD}(\text{GPP\_NT\_CUT\_XX}) / \text{SQRT}(40))$                 |
|                               | HH    | $\mu\text{molCO}_2$ m-2 s-1 | SE from 40 half-hourly GPP_NT_CUT_XX                                                                                                |
|                               | DD    | gC m-2 d-1                  | SE from 40 daily GPP_NT_CUT_XX                                                                                                      |
|                               | WW    | gC m-2 d-1                  | SE from 40 weekly GPP_NT_CUT_XX                                                                                                     |
|                               | MM    | gC m-2 d-1                  | SE from 40 monthly GPP_NT_CUT_XX                                                                                                    |
|                               | YY    | gC m-2 y-1                  | SE from 40 yearly GPP_NT_CUT_XX                                                                                                     |
| GPP_NT_CUT_XX                 |       |                             | Gross Primary Production, from Nighttime partitioning method (with XX = 05, 16, 25, 50, 75, 84, 95)                                 |
|                               | HH    | $\mu\text{molCO}_2$ m-2 s-1 |                                                                                                                                     |
|                               | DD    | gC m-2 d-1                  | calculated from half-hourly data                                                                                                    |
|                               | WW-MM | gC m-2 d-1                  | average from daily data                                                                                                             |
|                               | YY    | gC m-2 y-1                  | sum from daily data                                                                                                                 |
| <b>PARTITIONING - DAYTIME</b> |       |                             |                                                                                                                                     |

The FLUXNET2015 dataset and the ONEFlux processing pipeline for eddy covariance data  
 Supplementary Materials, Table SM1

|                     |                                                   |                                                                                                                                                                                     |
|---------------------|---------------------------------------------------|-------------------------------------------------------------------------------------------------------------------------------------------------------------------------------------|
| RECO_DT_VUT_REF     |                                                   | Ecosystem Respiration, from Daytime partitioning method, reference selected from RECO versions using model efficiency (MEF). The MEF analysis is repeated for each time aggregation |
| HH                  | $\mu\text{molCO}_2 \text{ m}^{-2} \text{ s}^{-1}$ |                                                                                                                                                                                     |
| DD                  | $\text{gC m}^{-2} \text{ d}^{-1}$                 | calculated from half-hourly data                                                                                                                                                    |
| WW-MM               | $\text{gC m}^{-2} \text{ d}^{-1}$                 | average from daily data                                                                                                                                                             |
| YY                  | $\text{gC m}^{-2} \text{ y}^{-1}$                 | sum from daily data                                                                                                                                                                 |
| RECO_DT_VUT_USTAR50 |                                                   | Ecosystem Respiration, from Daytime partitioning method, based on NEE_VUT_USTAR50                                                                                                   |
| HH                  | $\mu\text{molCO}_2 \text{ m}^{-2} \text{ s}^{-1}$ |                                                                                                                                                                                     |
| DD                  | $\text{gC m}^{-2} \text{ d}^{-1}$                 | calculated from half-hourly data                                                                                                                                                    |
| WW-MM               | $\text{gC m}^{-2} \text{ d}^{-1}$                 | average from daily data                                                                                                                                                             |
| YY                  | $\text{gC m}^{-2} \text{ y}^{-1}$                 | sum from daily data                                                                                                                                                                 |
| RECO_DT_VUT_MEAN    |                                                   | Ecosystem Respiration, from Daytime partitioning method, average from RECO versions, each from corresponding NEE_VUT_XX version                                                     |
| HH                  | $\mu\text{molCO}_2 \text{ m}^{-2} \text{ s}^{-1}$ | average from 40 half-hourly RECO_DT_VUT_XX                                                                                                                                          |
| DD                  | $\text{gC m}^{-2} \text{ d}^{-1}$                 | average from 40 daily RECO_DT_VUT_XX                                                                                                                                                |
| WW                  | $\text{gC m}^{-2} \text{ d}^{-1}$                 | average from 40 weekly RECO_DT_VUT_XX                                                                                                                                               |
| MM                  | $\text{gC m}^{-2} \text{ d}^{-1}$                 | average from 40 monthly RECO_DT_VUT_XX                                                                                                                                              |
| YY                  | $\text{gC m}^{-2} \text{ y}^{-1}$                 | average from 40 yearly RECO_DT_VUT_XX                                                                                                                                               |
| RECO_DT_VUT_SE      |                                                   | Standard Error for Ecosystem Respiration, calculated as $(\text{SD}(\text{RECO\_DT\_VUT\_XX}) / \text{SQRT}(40))$                                                                   |
| HH                  | $\mu\text{molCO}_2 \text{ m}^{-2} \text{ s}^{-1}$ | SE from 40 half-hourly RECO_DT_VUT_XX                                                                                                                                               |
| DD                  | $\text{gC m}^{-2} \text{ d}^{-1}$                 | SE from 40 daily RECO_DT_VUT_XX                                                                                                                                                     |
| WW                  | $\text{gC m}^{-2} \text{ d}^{-1}$                 | SE from 40 weekly RECO_DT_VUT_XX                                                                                                                                                    |
| MM                  | $\text{gC m}^{-2} \text{ d}^{-1}$                 | SE from 40 monthly RECO_DT_VUT_XX                                                                                                                                                   |
| YY                  | $\text{gC m}^{-2} \text{ y}^{-1}$                 | SE from 40 yearly RECO_DT_VUT_XX                                                                                                                                                    |

The FLUXNET2015 dataset and the ONEFlux processing pipeline for eddy covariance data  
 Supplementary Materials, Table SM1

|                     |       |                                                                                                                                                                                     |
|---------------------|-------|-------------------------------------------------------------------------------------------------------------------------------------------------------------------------------------|
| RECO_DT_VUT_XX      |       | Ecosystem Respiration, from Daytime partitioning method (with XX = 05, 16, 25, 50, 75, 84, 95)                                                                                      |
|                     | HH    | $\mu\text{molCO}_2 \text{ m}^{-2} \text{ s}^{-1}$                                                                                                                                   |
|                     | DD    | $\text{gC m}^{-2} \text{ d}^{-1}$<br>calculated from half-hourly data                                                                                                               |
|                     | WW-MM | $\text{gC m}^{-2} \text{ d}^{-1}$<br>average from daily data                                                                                                                        |
|                     | YY    | $\text{gC m}^{-2} \text{ y}^{-1}$<br>sum from daily data                                                                                                                            |
| RECO_DT_CUT_REF     |       | Ecosystem Respiration, from Daytime partitioning method, reference selected from RECO versions using model efficiency (MEF). The MEF analysis is repeated for each time aggregation |
|                     | HH    | $\mu\text{molCO}_2 \text{ m}^{-2} \text{ s}^{-1}$                                                                                                                                   |
|                     | DD    | $\text{gC m}^{-2} \text{ d}^{-1}$<br>calculated from half-hourly data                                                                                                               |
|                     | WW-MM | $\text{gC m}^{-2} \text{ d}^{-1}$<br>average from daily data                                                                                                                        |
|                     | YY    | $\text{gC m}^{-2} \text{ y}^{-1}$<br>sum from daily data                                                                                                                            |
| RECO_DT_CUT_USTAR50 |       | Ecosystem Respiration, from Daytime partitioning method, based on NEE_CUT_USTAR50                                                                                                   |
|                     | HH    | $\mu\text{molCO}_2 \text{ m}^{-2} \text{ s}^{-1}$                                                                                                                                   |
|                     | DD    | $\text{gC m}^{-2} \text{ d}^{-1}$<br>calculated from half-hourly data                                                                                                               |
|                     | WW-MM | $\text{gC m}^{-2} \text{ d}^{-1}$<br>average from daily data                                                                                                                        |
|                     | YY    | $\text{gC m}^{-2} \text{ y}^{-1}$<br>sum from daily data                                                                                                                            |
| RECO_DT_CUT_MEAN    |       | Ecosystem Respiration, from Daytime partitioning method, average from RECO versions, each from corresponding NEE_CUT_XX version                                                     |
|                     | HH    | $\mu\text{molCO}_2 \text{ m}^{-2} \text{ s}^{-1}$<br>average from 40 half-hourly RECO_DT_CUT_XX                                                                                     |
|                     | DD    | $\text{gC m}^{-2} \text{ d}^{-1}$<br>average from 40 daily RECO_DT_CUT_XX                                                                                                           |
|                     | WW    | $\text{gC m}^{-2} \text{ d}^{-1}$<br>average from 40 weekly RECO_DT_CUT_XX                                                                                                          |
|                     | MM    | $\text{gC m}^{-2} \text{ d}^{-1}$<br>average from 40 monthly RECO_DT_CUT_XX                                                                                                         |
|                     | YY    | $\text{gC m}^{-2} \text{ y}^{-1}$<br>average from 40 yearly RECO_DT_CUT_XX                                                                                                          |
| RECO_DT_CUT_SE      |       | Standard Error for Ecosystem Respiration, calculated as $(\text{SD}(\text{RECO\_DT\_CUT\_XX}) / \text{SQRT}(40))$                                                                   |



The FLUXNET2015 dataset and the ONEFlux processing pipeline for eddy covariance data  
 Supplementary Materials, Table SM1

|                    |       |                                                   |                                                                                                                                                                                       |
|--------------------|-------|---------------------------------------------------|---------------------------------------------------------------------------------------------------------------------------------------------------------------------------------------|
|                    | HH    | $\mu\text{molCO}_2 \text{ m}^{-2} \text{ s}^{-1}$ | SE from 40 half-hourly RECO_DT_CUT_XX                                                                                                                                                 |
|                    | DD    | $\text{gC m}^{-2} \text{ d}^{-1}$                 | SE from 40 daily RECO_DT_CUT_XX                                                                                                                                                       |
|                    | WW    | $\text{gC m}^{-2} \text{ d}^{-1}$                 | SE from 40 weekly RECO_DT_CUT_XX                                                                                                                                                      |
|                    | MM    | $\text{gC m}^{-2} \text{ d}^{-1}$                 | SE from 40 monthly RECO_DT_CUT_XX                                                                                                                                                     |
|                    | YY    | $\text{gC m}^{-2} \text{ y}^{-1}$                 | SE from 40 yearly RECO_DT_CUT_XX                                                                                                                                                      |
| RECO_DT_CUT_XX     |       |                                                   | Ecosystem Respiration, from Daytime partitioning method (with XX = 05, 16, 25, 50, 75, 84, 95)                                                                                        |
|                    | HH    | $\mu\text{molCO}_2 \text{ m}^{-2} \text{ s}^{-1}$ |                                                                                                                                                                                       |
|                    | DD    | $\text{gC m}^{-2} \text{ d}^{-1}$                 | calculated from half-hourly data                                                                                                                                                      |
|                    | WW-MM | $\text{gC m}^{-2} \text{ d}^{-1}$                 | average from daily data                                                                                                                                                               |
|                    | YY    | $\text{gC m}^{-2} \text{ y}^{-1}$                 | sum from daily data                                                                                                                                                                   |
| GPP_DT_VUT_REF     |       |                                                   | Gross Primary Production, from Daytime partitioning method, reference selected from GPP versions using model efficiency (MEF). The MEF analysis is repeated for each time aggregation |
|                    | HH    | $\mu\text{molCO}_2 \text{ m}^{-2} \text{ s}^{-1}$ |                                                                                                                                                                                       |
|                    | DD    | $\text{gC m}^{-2} \text{ d}^{-1}$                 | calculated from half-hourly data                                                                                                                                                      |
|                    | WW-MM | $\text{gC m}^{-2} \text{ d}^{-1}$                 | average from daily data                                                                                                                                                               |
|                    | YY    | $\text{gC m}^{-2} \text{ y}^{-1}$                 | sum from daily data                                                                                                                                                                   |
| GPP_DT_VUT_USTAR50 |       |                                                   | Gross Primary Production, from Daytime partitioning method, based on NEE_VUT_USTAR50                                                                                                  |
|                    | HH    | $\mu\text{molCO}_2 \text{ m}^{-2} \text{ s}^{-1}$ |                                                                                                                                                                                       |
|                    | DD    | $\text{gC m}^{-2} \text{ d}^{-1}$                 | calculated from half-hourly data                                                                                                                                                      |
|                    | WW-MM | $\text{gC m}^{-2} \text{ d}^{-1}$                 | average from daily data                                                                                                                                                               |
|                    | YY    | $\text{gC m}^{-2} \text{ y}^{-1}$                 | sum from daily data                                                                                                                                                                   |
| GPP_DT_VUT_MEAN    |       |                                                   | Gross Primary Production, from Daytime partitioning method, average from GPP versions, each from corresponding NEE_VUT_XX version                                                     |
|                    | HH    | $\mu\text{molCO}_2 \text{ m}^{-2} \text{ s}^{-1}$ | average from 40 half-hourly GPP_DT_VUT_XX                                                                                                                                             |
|                    | DD    | $\text{gC m}^{-2} \text{ d}^{-1}$                 | average from 40 daily GPP_DT_VUT_XX                                                                                                                                                   |
|                    | WW    | $\text{gC m}^{-2} \text{ d}^{-1}$                 | average from 40 weekly GPP_DT_VUT_XX                                                                                                                                                  |
|                    | MM    | $\text{gC m}^{-2} \text{ d}^{-1}$                 | average from 40 monthly GPP_DT_VUT_XX                                                                                                                                                 |

The FLUXNET2015 dataset and the ONEFlux processing pipeline for eddy covariance data  
 Supplementary Materials, Table SM1

|                    |       |                 |                                                                                                                                                                                       |
|--------------------|-------|-----------------|---------------------------------------------------------------------------------------------------------------------------------------------------------------------------------------|
|                    | YY    | gC m-2 y-1      | average from 40 yearly GPP_DT_VUT_XX                                                                                                                                                  |
| GPP_DT_VUT_SE      |       |                 | Standard Error for Gross Primary Production, calculated as (SD(GPP_DT_VUT_XX) / SQRT(40))                                                                                             |
|                    | HH    | μmolCO2 m-2 s-1 | SE from 40 half-hourly GPP_DT_VUT_XX                                                                                                                                                  |
|                    | DD    | gC m-2 d-1      | SE from 40 daily GPP_DT_VUT_XX                                                                                                                                                        |
|                    | WW    | gC m-2 d-1      | SE from 40 weekly GPP_DT_VUT_XX                                                                                                                                                       |
|                    | MM    | gC m-2 d-1      | SE from 40 monthly GPP_DT_VUT_XX                                                                                                                                                      |
|                    | YY    | gC m-2 y-1      | SE from 40 yearly GPP_DT_VUT_XX                                                                                                                                                       |
| GPP_DT_VUT_XX      |       |                 | Gross Primary Production, from Daytime partitioning method (with XX = 05, 16, 25, 50, 75, 84, 95)                                                                                     |
|                    | HH    | μmolCO2 m-2 s-1 |                                                                                                                                                                                       |
|                    | DD    | gC m-2 d-1      | calculated from half-hourly data                                                                                                                                                      |
|                    | WW-MM | gC m-2 d-1      | average from daily data                                                                                                                                                               |
|                    | YY    | gC m-2 y-1      | sum from daily data                                                                                                                                                                   |
| GPP_DT_CUT_REF     |       |                 | Gross Primary Production, from Daytime partitioning method, reference selected from GPP versions using model efficiency (MEF). The MEF analysis is repeated for each time aggregation |
|                    | HH    | μmolCO2 m-2 s-1 |                                                                                                                                                                                       |
|                    | DD    | gC m-2 d-1      | calculated from half-hourly data                                                                                                                                                      |
|                    | WW-MM | gC m-2 d-1      | average from daily data                                                                                                                                                               |
|                    | YY    | gC m-2 y-1      | sum from daily data                                                                                                                                                                   |
| GPP_DT_CUT_USTAR50 |       |                 | Gross Primary Production, from Daytime partitioning method, based on NEE_CUT_USTAR50                                                                                                  |
|                    | HH    | μmolCO2 m-2 s-1 |                                                                                                                                                                                       |
|                    | DD    | gC m-2 d-1      | calculated from half-hourly data                                                                                                                                                      |
|                    | WW-MM | gC m-2 d-1      | average from daily data                                                                                                                                                               |
|                    | YY    | gC m-2 y-1      | sum from daily data                                                                                                                                                                   |
| GPP_DT_CUT_MEAN    |       |                 | Gross Primary Production, from Daytime partitioning method, average from GPP versions, each from corresponding NEE_CUT_XX version                                                     |
|                    | HH    | μmolCO2 m-2 s-1 | average from 40 half-hourly GPP_DT_CUT_XX                                                                                                                                             |

The FLUXNET2015 dataset and the ONEFlux processing pipeline for eddy covariance data  
 Supplementary Materials, Table SM1

|                               |       |                                                   |                                                                                                                                |
|-------------------------------|-------|---------------------------------------------------|--------------------------------------------------------------------------------------------------------------------------------|
|                               | DD    | gC m-2 d-1                                        | average from 40 daily GPP_DT_CUT_XX                                                                                            |
|                               | WW    | gC m-2 d-1                                        | average from 40 weekly GPP_DT_CUT_XX                                                                                           |
|                               | MM    | gC m-2 d-1                                        | average from 40 monthly GPP_DT_CUT_XX                                                                                          |
|                               | YY    | gC m-2 y-1                                        | average from 40 yearly GPP_DT_CUT_XX                                                                                           |
| GPP_DT_CUT_SE                 |       |                                                   | Standard Error for Gross Primary Production, calculated as (SD(GPP_DT_CUT_XX) / SQRT(40))                                      |
|                               | HH    | $\mu\text{molCO}_2 \text{ m}^{-2} \text{ s}^{-1}$ | SE from 40 half-hourly GPP_DT_CUT_XX                                                                                           |
|                               | DD    | gC m-2 d-1                                        | SE from 40 daily GPP_DT_CUT_XX                                                                                                 |
|                               | WW    | gC m-2 d-1                                        | SE from 40 weekly GPP_DT_CUT_XX                                                                                                |
|                               | MM    | gC m-2 d-1                                        | SE from 40 monthly GPP_DT_CUT_XX                                                                                               |
|                               | YY    | gC m-2 y-1                                        | SE from 40 yearly GPP_DT_CUT_XX                                                                                                |
| GPP_DT_CUT_XX                 |       |                                                   | Gross Primary Production, from Daytime partitioning method (with XX = 05, 16, 25, 50, 75, 84, 95)                              |
|                               | HH    | $\mu\text{molCO}_2 \text{ m}^{-2} \text{ s}^{-1}$ |                                                                                                                                |
|                               | DD    | gC m-2 d-1                                        | calculated from half-hourly data                                                                                               |
|                               | WW-MM | gC m-2 d-1                                        | average from daily data                                                                                                        |
|                               | YY    | gC m-2 y-1                                        | sum from daily data                                                                                                            |
| <b>PARTITIONING - SUNDOWN</b> |       |                                                   |                                                                                                                                |
| RECO_SR                       |       |                                                   | Ecosystem Respiration, from Sundown Respiration partitioning method                                                            |
|                               | HH    | $\mu\text{molCO}_2 \text{ m}^{-2} \text{ s}^{-1}$ |                                                                                                                                |
|                               | DD    | gC m-2 d-1                                        | calculated from half-hourly data                                                                                               |
|                               | WW-MM | gC m-2 d-1                                        | average from daily data                                                                                                        |
|                               | YY    | gC m-2 y-1                                        | sum from daily data                                                                                                            |
| RECO_SR_N                     |       |                                                   | Fraction between 0-1, indicating the percentage of data available in the averaging period to parametrize the respiration model |
|                               | HH    |                                                   | not available                                                                                                                  |
|                               | DD-YY | nondimensional                                    | percentage of data available                                                                                                   |

**Table SM7.** Predefined unit options. Except for COUNTRY, all options are listed for each variable to give users an understanding of what options were available (i.e., not all options exist in the dataset). BADM Vocabulary is the standard name used to describe pre-defined unit options in the BADM standards.

| Variable<br>(BADM Vocabulary) | Option         | Description                                                                  |
|-------------------------------|----------------|------------------------------------------------------------------------------|
| ASPECT<br>(ASPECT)            | E              | East                                                                         |
|                               | ENE            | East-northeast                                                               |
|                               | ESE            | East-southeast                                                               |
|                               | FLAT           | The site is flat and the footprint/exposure is not in any specific direction |
|                               | N              | North                                                                        |
|                               | NE             | Northeast                                                                    |
|                               | NNE            | North-northeast                                                              |
|                               | NNW            | North-northwest                                                              |
|                               | NW             | Northwest                                                                    |
|                               | S              | South                                                                        |
|                               | SE             | Southeast                                                                    |
|                               | SSE            | South-southeast                                                              |
|                               | SSW            | South-southwest                                                              |
|                               | SW             | Southwest                                                                    |
|                               | W              | West                                                                         |
|                               | WNW            | West-northwest                                                               |
| WSW                           | West-southwest |                                                                              |
| COUNTRY<br>(COUNTRY)          | Argentina      |                                                                              |
|                               | Austria        |                                                                              |
|                               | Australia      |                                                                              |
|                               | Belgium        |                                                                              |
|                               | Brazil         |                                                                              |

The FLUXNET2015 dataset and the ONEFlux processing pipeline for eddy covariance data  
 Supplementary Materials, Table SM7

|                |                           |      |
|----------------|---------------------------|------|
|                | Canada                    |      |
|                | Republic of Congo         |      |
|                | Switzerland               |      |
|                | China                     |      |
|                | Czech Republic            |      |
|                | Germany                   |      |
|                | Denmark                   |      |
|                | Spain                     |      |
|                | Finland                   |      |
|                | France                    |      |
|                | French Guyana             |      |
|                | Ghana                     |      |
|                | Greenland                 |      |
|                | Italy                     |      |
|                | Japan                     |      |
|                | Malaysia                  |      |
|                | Netherlands               |      |
|                | Panama                    |      |
|                | Russia                    |      |
|                | Sudan                     |      |
|                | Sweden                    |      |
|                | Svalbard and Jan<br>Mayen |      |
|                | Senegal                   |      |
|                | USA                       |      |
|                | South Africa              |      |
|                | Zambia                    |      |
| WIND_DIRECTION | E                         | East |

The FLUXNET2015 dataset and the ONEFlux processing pipeline for eddy covariance data  
 Supplementary Materials, Table SM7

|                              |                   |                                                                                                                                                          |
|------------------------------|-------------------|----------------------------------------------------------------------------------------------------------------------------------------------------------|
| (DIR)                        | ENE               | East-northeast                                                                                                                                           |
|                              | ESE               | East-southeast                                                                                                                                           |
|                              | N                 | North                                                                                                                                                    |
|                              | NE                | Northeast                                                                                                                                                |
|                              | NNE               | North-northeast                                                                                                                                          |
|                              | NNW               | North-northwest                                                                                                                                          |
|                              | NW                | Northwest                                                                                                                                                |
|                              | S                 | South                                                                                                                                                    |
|                              | SE                | Southeast                                                                                                                                                |
|                              | SSE               | South-southeast                                                                                                                                          |
|                              | SSW               | South-southwest                                                                                                                                          |
|                              | SW                | Southwest                                                                                                                                                |
|                              | W                 | West                                                                                                                                                     |
|                              | WNW               | West-northwest                                                                                                                                           |
|                              | WSW               | West-southwest                                                                                                                                           |
| DOM_DIST_MGMT<br>(DIST_MGMT) | Agriculture       | Agricultural management of any kind, such as cultivation (including tillage, plowing, or discing), harvest, irrigation, pesticides, planting, or liming. |
|                              | Drought           | Prolonged water deficiency; hydrologic or climatic drought.                                                                                              |
|                              | Fire              | Wildfire or managed burns                                                                                                                                |
|                              | Forestry          | Forest management such as logging of any kind, plantation planting, or herbicide application.                                                            |
|                              | Grazing           | Herbivory or browsing by mammals, managed or wild.                                                                                                       |
|                              | Hydrologic event  | Drainage, persistent flooding, or chronic flooding. Does not include storm events or irrigation                                                          |
|                              | Land cover change | Land use and land cover change; invasion; woody or urban encroachment                                                                                    |
|                              | Pests and disease | Plant or soil damage from pests, insects, pathogens, blight, and other disease.                                                                          |

The FLUXNET2015 dataset and the ONEFlux processing pipeline for eddy covariance data  
 Supplementary Materials, Table SM7

|                                                   |                               |                                                                                                                                                       |
|---------------------------------------------------|-------------------------------|-------------------------------------------------------------------------------------------------------------------------------------------------------|
|                                                   | Storm or wind                 | Major storms including unusually high-precipitation and unusually high-wind events e.g. hurricane, tornado, blizzard, hail, flooding from storm, etc. |
|                                                   | Temperature extreme           | Heat wave or freeze                                                                                                                                   |
|                                                   | Undisturbed                   | No disturbance or management has occurred on the site.                                                                                                |
| DOI_ORGANIZATION_ROLE<br>(DOI_ORG_ROLE)           | Originator                    | Organization that performed the research or owns the dataset. Normally the institution(s) of the tower team PI(s).                                    |
|                                                   | Sponsor                       | Any company, institution, or organization which sponsored / funded the research.                                                                      |
| DOI_CONTRIBUTOR_ROLE<br>(DOI_ROLE)                | Author                        | A person who should be listed in the DOI citation as an author.                                                                                       |
|                                                   | Other                         | A person whose role is not described by options in this predefined list.                                                                              |
| FLUX_MEASUREMENTS_METHOD<br>(FLUX_METHOD)         | Chambers                      |                                                                                                                                                       |
|                                                   | Eddy Covariance               |                                                                                                                                                       |
|                                                   | Gradients                     |                                                                                                                                                       |
|                                                   | Other                         |                                                                                                                                                       |
|                                                   | Scintillometer                |                                                                                                                                                       |
| FLUX_MEASUREMENTS_OPERATIONS<br>(FLUX_OPERATIONS) | Continuous operation          | Variable collected continuously with the reported method.                                                                                             |
|                                                   | Growing season operation only | Variable collected only during the growing season with the reported method                                                                            |
|                                                   | Intermittent                  | Variable collected intermittently with the reported method                                                                                            |
|                                                   | Periodic operation            | Variable collected part of the year with the reported method                                                                                          |
|                                                   | Planned                       | The site or equipment to collect the specific variable is not yet operational                                                                         |
| FLUX_MEASUREMENTS_VARIABLE<br>(FLUX_VARIABLE)     | Aerosols                      |                                                                                                                                                       |
|                                                   | BVOCs                         |                                                                                                                                                       |
|                                                   | CH4                           |                                                                                                                                                       |

The FLUXNET2015 dataset and the ONEFlux processing pipeline for eddy covariance data  
 Supplementary Materials, Table SM7

|                |          |                                                                                                                                                                                                                                               |
|----------------|----------|-----------------------------------------------------------------------------------------------------------------------------------------------------------------------------------------------------------------------------------------------|
|                | CO2      |                                                                                                                                                                                                                                               |
|                | H        |                                                                                                                                                                                                                                               |
|                | H2O      |                                                                                                                                                                                                                                               |
|                | Isotopes |                                                                                                                                                                                                                                               |
|                | N2O      |                                                                                                                                                                                                                                               |
|                | O3       |                                                                                                                                                                                                                                               |
|                | Other    |                                                                                                                                                                                                                                               |
| IGBP<br>(IGBP) | BSV      | Barren Sparse Vegetation: Lands exposed soil, sand, or rocks and has less than 10% vegetative cover during any time of the year.                                                                                                              |
|                | CRO      | Croplands: Lands covered with temporary crops followed by harvest and a bare soil period (e.g., single and multiple cropping systems). Note that perennial woody crops will be classified as the appropriate forest or shrub land cover type. |
|                | CSH      | Closed Shrublands: Lands with woody vegetation less than 2 meters tall and with shrub canopy cover >60%. The shrub foliage can be either evergreen or deciduous.                                                                              |
|                | CVM      | Cropland/Natural Vegetation Mosaics: Lands with a mosaic of croplands, forest, shrublands, and grasslands in which no one component comprises more than 60% of the landscape                                                                  |
|                | DBF      | Deciduous Broadleaf Forests: Lands dominated by woody vegetation with a percent cover >60% and height exceeding 2 meters. Consists of broadleaf tree communities with an annual cycle of leaf-on and leaf-off periods.                        |
|                | DNF      | Deciduous Needleleaf Forests: Lands dominated by woody vegetation with a percent cover >60% and height exceeding 2 meters. Consists of seasonal needleleaf tree communities with an annual cycle of leaf-on and leaf-off periods.             |
|                | EBF      | Evergreen Broadleaf Forests: Lands dominated by woody vegetation with a percent cover >60% and height exceeding 2 meters. Almost all trees and shrubs remain green year round. Canopy is never without green foliage.                         |
|                | ENF      | Evergreen Needleleaf Forests: Lands dominated by                                                                                                                                                                                              |



The FLUXNET2015 dataset and the ONEFlux processing pipeline for eddy covariance data  
 Supplementary Materials, Table SM7

|                                |                |                                                                                                                                                                                                                                                                 |
|--------------------------------|----------------|-----------------------------------------------------------------------------------------------------------------------------------------------------------------------------------------------------------------------------------------------------------------|
|                                |                | woody vegetation with a percent cover >60% and height exceeding 2 meters. Almost all trees remain green all year. Canopy is never without green foliage.                                                                                                        |
|                                | GRA            | Grasslands: Lands with herbaceous types of cover. Tree and shrub cover is less than 10%. Permanent wetlands lands with a permanent mixture of water and herbaceous or woody vegetation. The vegetation can be present in either salt, brackish, or fresh water. |
|                                | MF             | Mixed Forests: Lands dominated by trees with a percent cover >60% and height exceeding 2 meters. Consists of tree communities with interspersed mixtures or mosaics of the other four forest types. None of the forest types exceeds 60% of landscape.          |
|                                | OSH            | Open Shrublands: Lands with woody vegetation less than 2 meters tall and with shrub canopy cover between 10-60%. The shrub foliage can be either evergreen or deciduous.                                                                                        |
|                                | SAV            | Savannas: Lands with herbaceous and other understory systems, and with forest canopy cover between 10-30%. The forest cover height exceeds 2 meters.                                                                                                            |
|                                | SNO            | Snow and Ice: Lands under snow/ice cover most of the year.                                                                                                                                                                                                      |
|                                | URB            | Urban and Built-Up Lands: Land covered by buildings and other man-made structures.                                                                                                                                                                              |
|                                | WAT            | Water Bodies : Oceans, seas, lakes, reservoirs, and rivers. Can be either fresh or salt- water bodies.                                                                                                                                                          |
|                                | WET            | Permanent Wetlands: Lands with a permanent mixture of water and herbaceous or woody vegetation that cover extensive areas. The vegetation can be present in either salt, brackish, or fresh water                                                               |
|                                | WSA            | Woody Savannas: Lands with herbaceous and other understory systems, and with forest canopy cover between 30-60%. The forest cover height exceeds 2 meters.                                                                                                      |
| VAR_INFO_MODEL<br>(INST_MODEL) | GA_CP_SA-Other | Gas Analyzer, Closed Path with Sonic Anemometer - Other                                                                                                                                                                                                         |
|                                | GA_CP-Aerodyne | Gas Analyzer, Closed Path Fast Response, Aerodyne                                                                                                                                                                                                               |

The FLUXNET2015 dataset and the ONEFlux processing pipeline for eddy covariance data  
 Supplementary Materials, Table SM7

|                        |                                                                                                                  |
|------------------------|------------------------------------------------------------------------------------------------------------------|
| GA_CP-Campbell EC155   | Gas Analyzer, Closed Path, Campbell EC155                                                                        |
| GA_CP-Campbell TGA100  | Gas Analyzer, Closed Path, Campbell TGA100                                                                       |
| GA_CP-Campbell TGA200A | Gas Analyzer, Closed Path, Campbell TGA200A                                                                      |
| GA_CP-LGR 911-0001     | Gas Analyzer, Closed Path, Los Gatos Research 911-0001 for CH <sub>4</sub> /H <sub>2</sub> O                     |
| GA_CP-LGR 911-0010     | Gas Analyzer, Closed Path, Los Gatos Research 911-0010 for CH <sub>4</sub> /CO <sub>2</sub> /H <sub>2</sub> O    |
| GA_CP-LGR 911-0020     | Gas Analyzer, Closed Path, Los Gatos Research 911-0020 for CO <sub>2</sub> /H <sub>2</sub> O                     |
| GA_CP-LGR 913-0014     | Gas Analyzer, Closed Path, Los Gatos Research 913-0014 for N <sub>2</sub> O/CO/H <sub>2</sub> O                  |
| GA_CP-LGR 913-0029     | Gas Analyzer, Closed Path, Los Gatos Research 913-0029 and 907-0029 for CO/CO <sub>2</sub> /H <sub>2</sub> O     |
| GA_CP-LGR 913-1054     | Gas Analyzer, Closed Path, Los Gatos Research 913-1054 for N <sub>2</sub> O/CH <sub>4</sub> /H <sub>2</sub> O    |
| GA_CP-LGR 914-0028     | Gas Analyzer, Closed Path, Los Gatos Research 914-0028 and 907-0028 for OCS/CO <sub>2</sub> /CO/H <sub>2</sub> O |
| GA_CP-LGR 914-1012     | Gas Analyzer, Closed Path, Los Gatos Research 914-1012 and 914-0012 for NH <sub>3</sub> /H <sub>2</sub> O        |
| GA_CP-LGR Other        | Gas Analyzer, Closed Path, Los Gatos Research Other Model                                                        |
| GA_CP-LGR RMT-200      | Gas Analyzer, Closed Path, Los Gatos Research RMT-200                                                            |
| GA_CP-LI-COR LI-6252   | Gas Analyzer, Closed Path, LI-COR LI-6252                                                                        |
| GA_CP-LI-COR LI-6262   | Gas Analyzer, Closed Path, LI-COR LI-6262                                                                        |
| GA_CP-LI-COR LI-7000   | Gas Analyzer, Closed Path, LI-COR LI-7000                                                                        |
| GA_CP-LI-COR LI-7200   | Gas Analyzer, Closed Path, LI-COR LI-7200                                                                        |
| GA_CP-LI-COR LI-7200RS | Gas Analyzer, Closed Path, LI-COR LI-7200RS                                                                      |

The FLUXNET2015 dataset and the ONEFlux processing pipeline for eddy covariance data  
 Supplementary Materials, Table SM7

|                              |                                                                 |
|------------------------------|-----------------------------------------------------------------|
| GA_CP-Other                  | Gas Analyzer, Closed Path Fast Response - Other                 |
| GA_CP-Picarro G1301-f        | Gas Analyzer, Closed Path, Picarro G1301-f                      |
| GA_CP-Picarro G2301-f        | Gas Analyzer, Closed Path, Picarro G2301-f                      |
| GA_CP-Picarro G2311-f        | Gas Analyzer, Closed Path, Picarro G2311-f                      |
| GA_CP-Picarro Other          | Gas Analyzer, Closed Path, Picarro Other Model                  |
| GA_OP_SA-Campbell IRGASON    | Gas Analyzer, Open Path with Sonic Anemometer, Campbell IRGASON |
| GA_OP_SA-Other               | Gas Analyzer, Open Path with Sonic Anemometer - Other           |
| GA_OP-Campbell EC150         | Gas Analyzer, Open Path, Campbell EC150                         |
| GA_OP-Krypton Hygrometer     | Gas Analyzer, Open Path, Krypton Hygrometer                     |
| GA_OP-LI-COR LI-7500         | Gas Analyzer, Open Path, LI-COR LI-7500                         |
| GA_OP-LI-COR LI-7500A        | Gas Analyzer, Open Path, LI-COR LI-7500A                        |
| GA_OP-LI-COR LI-7500DS       | Gas Analyzer, Open Path, LI-COR LI-7500DS                       |
| GA_OP-LI-COR LI-7500RS       | Gas Analyzer, Open Path, LI-COR LI-7500RS                       |
| GA_OP-LI-COR LI-7700         | Gas Analyzer, Open Path, LI-COR LI-7700                         |
| GA_OP-Lyman-alpha Hygrometer | Gas Analyzer, Open Path, Lyman-alpha Hygrometer                 |
| GA_OP-Other                  | Gas Analyzer, Open Path Fast Response - Other                   |
| GA_SR-LI-COR LI-800          | Gas Analyzer, Slow Response, LI-COR LI-800                      |
| GA_SR-LI-COR LI-8100         | Gas Analyzer, Slow Response, LI-COR LI-8100                     |
| GA_SR-LI-COR LI-8100A        | Gas Analyzer, Slow Response, LI-COR LI-8100A                    |

The FLUXNET2015 dataset and the ONEFlux processing pipeline for eddy covariance data  
 Supplementary Materials, Table SM7

|                         |                                                             |
|-------------------------|-------------------------------------------------------------|
| GA_SR-LI-COR<br>LI-820  | Gas Analyzer, Slow Response, LI-COR LI-820                  |
| GA_SR-LI-COR<br>LI-840  | Gas Analyzer, Slow Response, LI-COR LI-840                  |
| GA_SR-LI-COR<br>LI-840A | Gas Analyzer, Slow Response, LI-COR LI-840A                 |
| GA_SR-Other             | Gas Analyzer, Slow Response - Other                         |
| GA_SR-Picarro G2401     | Gas Analyzer, Slow Response, Picarro G2401                  |
| GA-Other                | Gas Analyzer - Other                                        |
| SA-ATI                  | Sonic Anemometer - ATI                                      |
| SA-ATI CATI/2           | Sonic Anemometer - ATI CATI/2                               |
| SA-ATI SATI A Style     | Sonic Anemometer - ATI SATI A Style                         |
| SA-ATI SATI K Style     | Sonic Anemometer - ATI SATI K Style including<br>SWS-211/3K |
| SA-ATI SPAS             | Sonic Anemometer - ATI SPAS                                 |
| SA-ATI Sx Style         | Sonic Anemometer - ATI Sx Style                             |
| SA-ATI V Style          | Sonic Anemometer - ATI V Style                              |
| SA-ATI Vx Style         | Sonic Anemometer - ATI Vx Style                             |
| SA-Campbell CSAT-3      | Sonic Anemometer - Campbell CSAT-3                          |
| SA-Campbell<br>CSAT-3A  | Sonic Anemometer - Campbell CSAT-3A                         |
| SA-Campbell<br>CSAT-3B  | Sonic Anemometer - Campbell CSAT-3B                         |
| SA-Gill HS-100          | Sonic Anemometer - Gill HS-100                              |
| SA-Gill HS-50           | Sonic Anemometer - Gill HS-50                               |
| SA-Gill R2              | Sonic Anemometer - Gill R2                                  |
| SA-Gill R3-100          | Sonic Anemometer - Gill R3-100                              |
| SA-Gill R3-50           | Sonic Anemometer - Gill R3-50                               |
| SA-Gill R3A-100         | Sonic Anemometer - Gill R3A-100                             |
| SA-Gill Windmaster      | Sonic Anemometer - Gill Windmaster                          |

The FLUXNET2015 dataset and the ONEFlux processing pipeline for eddy covariance data  
 Supplementary Materials, Table SM7

|                  |                              |                                                                                                                                                     |
|------------------|------------------------------|-----------------------------------------------------------------------------------------------------------------------------------------------------|
|                  | SA-Gill Windmaster HS        | Sonic Anemometer - Gill Windmaster HS                                                                                                               |
|                  | SA-Gill Windmaster Pro       | Sonic Anemometer - Gill Windmaster Pro2                                                                                                             |
|                  | SA-Metek USA-1 Fast          | Sonic Anemometer - Metek USA-1 Fast                                                                                                                 |
|                  | SA-Metek uSonic-3 Class A    | Sonic Anemometer - Metek uSonic-3 Class A                                                                                                           |
|                  | SA-Metek uSonic-3 Omni       | Sonic Anemometer - Metek uSonic-3 Omni                                                                                                              |
|                  | SA-Metek uSonic-3 Scientific | Sonic Anemometer - Metek uSonic-3 Scientific (formerly USA-1)                                                                                       |
|                  | SA-Other                     | Sonic Anemometer - Other                                                                                                                            |
|                  | SA-Young 81000               | Sonic Anemometer - Young 81000                                                                                                                      |
|                  | SA-Young 81000RE             | Sonic Anemometer - Young 81000RE                                                                                                                    |
|                  | SA-Young 81000V              | Sonic Anemometer - Young 81000V                                                                                                                     |
|                  | SA-Young 81000VRE            | Sonic Anemometer - Young 81000VRE                                                                                                                   |
| LAND_OWNERSHIP   | private                      | Land ownership: private                                                                                                                             |
| (LAND_OWNERSHIP) | public                       | Land ownership: public                                                                                                                              |
| NETWORK          | AmeriFlux                    | <a href="http://ameriflux.lbl.gov">http://ameriflux.lbl.gov</a>                                                                                     |
| (NETWORK)        | AsiaFlux                     | <a href="http://www.asiaflux.net/">http://www.asiaflux.net/</a>                                                                                     |
|                  | CarboAfrica                  | <a href="http://www.carboafrika.net/">http://www.carboafrika.net/</a>                                                                               |
|                  | CarboEuroFlux                |                                                                                                                                                     |
|                  | CarboEuropelP                |                                                                                                                                                     |
|                  | CarboExtreme                 | <a href="http://www.carboextreme.eu">http://www.carboextreme.eu</a>                                                                                 |
|                  | Carboltaly                   |                                                                                                                                                     |
|                  | Carbomont                    | <a href="http://www.uibk.ac.at/carbomont/">http://www.uibk.ac.at/carbomont/</a>                                                                     |
|                  | ChinaFLUX                    | <a href="http://www.chinaflux.org/en/index/index.asp">http://www.chinaflux.org/en/index/index.asp</a>                                               |
|                  | EuroFlux                     | <a href="http://www.unitus.it/dipartimenti/disafri/progetti/eflux/euro.html">http://www.unitus.it/dipartimenti/disafri/progetti/eflux/euro.html</a> |
|                  | Fluxnet-Canada               | <a href="http://fluxnet.ccrp.ec.gc.ca">http://fluxnet.ccrp.ec.gc.ca</a>                                                                             |

The FLUXNET2015 dataset and the ONEFlux processing pipeline for eddy covariance data  
 Supplementary Materials, Table SM7

|                                    |                    |                                                                                                                                     |
|------------------------------------|--------------------|-------------------------------------------------------------------------------------------------------------------------------------|
|                                    | GHG-Europe         | <a href="http://www.ghg-europe.eu/">http://www.ghg-europe.eu/</a>                                                                   |
|                                    | GreenGrass         |                                                                                                                                     |
|                                    | ICOS               | <a href="http://www.icos-ri.eu/">http://www.icos-ri.eu/</a>                                                                         |
|                                    | IMECC              | <a href="http://imecc.ipsl.jussieu.fr/">http://imecc.ipsl.jussieu.fr/</a>                                                           |
|                                    | InGOS              | <a href="http://www.ingos-infrastructure.eu/">http://www.ingos-infrastructure.eu/</a>                                               |
|                                    | JapanFlux          | <a href="http://www.japanflux.org/">http://www.japanflux.org/</a>                                                                   |
|                                    | KoFlux             |                                                                                                                                     |
|                                    | LBA                | <a href="http://www.lbaeco.org/lbaeco/index.html">http://www.lbaeco.org/lbaeco/index.html</a>                                       |
|                                    | LTAR               | <a href="https://ltar.ars.usda.gov/">https://ltar.ars.usda.gov/</a>                                                                 |
|                                    | LTER               | <a href="http://www.lternet.edu/">http://www.lternet.edu/</a>                                                                       |
|                                    | Medeflu            |                                                                                                                                     |
|                                    | MexFlux            |                                                                                                                                     |
|                                    | NEON               | <a href="http://www.neoninc.org/">http://www.neoninc.org/</a>                                                                       |
|                                    | OzFlux             | <a href="http://www.ozflux.org.au/">http://www.ozflux.org.au/</a>                                                                   |
|                                    | PAGE21             | <a href="http://www.page21.eu/">http://www.page21.eu/</a>                                                                           |
|                                    | Phenocam           | <a href="https://phenocam.sr.unh.edu/webcam/">https://phenocam.sr.unh.edu/webcam/</a>                                               |
|                                    | Swiss FluxNet      | <a href="http://www.gl.ethz.ch/research/bage/fluxnet-ch.html">http://www.gl.ethz.ch/research/bage/fluxnet-ch.html</a>               |
|                                    | TaiwanFlux         | <a href="http://140.112.63.212/tflux.html">http://140.112.63.212/tflux.html</a>                                                     |
|                                    | TCOS-Siberia       | <a href="http://www.bgc.mpg.de/public/carboeur/web_TCOS/">http://www.bgc.mpg.de/public/carboeur/web_TCOS/</a>                       |
|                                    | TERENO             | <a href="http://teodoor.icg.kfa-juelich.de/overview-en">http://teodoor.icg.kfa-juelich.de/overview-en</a>                           |
|                                    | ThaiFlux           | <a href="http://compete.center.ku.ac.th/HomeFlux.htm">http://compete.center.ku.ac.th/HomeFlux.htm</a>                               |
|                                    | TROPI-DRY          | <a href="http://tropi-dry.eas.ualberta.ca/">http://tropi-dry.eas.ualberta.ca/</a>                                                   |
|                                    | Unaffiliated       |                                                                                                                                     |
|                                    | Urban Flux Network | <a href="http://www.geog.ubc.ca/urbanflux/">http://www.geog.ubc.ca/urbanflux/</a>                                                   |
|                                    | USCCC              | <a href="http://research.eescience.utoledo.edu/lees/research/usccc/">http://research.eescience.utoledo.edu/lees/research/usccc/</a> |
| REFERENCE_USAGE<br>(REFERENCE_USAG | Alt_Citation       | Additional papers that could be used as citations for the site.                                                                     |

The FLUXNET2015 dataset and the ONEFlux processing pipeline for eddy covariance data  
 Supplementary Materials, Table SM7

|                                 |                               |                                                                                                                                                                                                                                           |
|---------------------------------|-------------------------------|-------------------------------------------------------------------------------------------------------------------------------------------------------------------------------------------------------------------------------------------|
| E)                              | Analysis_Result               | Paper describing results of an analysis performed at the site or using the data from the site.                                                                                                                                            |
|                                 | Background                    | Useful paper for understanding the history and background of the site.                                                                                                                                                                    |
|                                 | Primary_Citation              | Paper recommended to be used as a citation for the site.                                                                                                                                                                                  |
|                                 | Reference                     | Useful paper for understanding the site and/or measurements at the site.                                                                                                                                                                  |
| TEAM_MEMBER_ROLE<br>(TEAM_ROLE) | Affiliate                     | Affiliated site member: additional staff members.                                                                                                                                                                                         |
|                                 | AncContact                    | Ancillary data contact: person in addition to the PI to be contacted regarding site data                                                                                                                                                  |
|                                 | BADMContact                   | BADM data contact: person to be contacted regarding biological, soil, disturbance and management and other site information                                                                                                               |
|                                 | DataManager                   | Data Manager: person to be contacted regarding data preparation and submission.                                                                                                                                                           |
|                                 | FluxContact                   | Flux-met data contact: person to be contacted regarding micrometeorological measurements.                                                                                                                                                 |
|                                 | PI                            | Principal Investigator: person primarily responsible for the site that should be contacted for data policy and other important issues and also CC'ed in all the communications with the team members. At least one PI must be designated. |
|                                 | Technician                    | Technician responsible for maintaining site operations                                                                                                                                                                                    |
| TERRAIN<br>(TERRAIN)            | Flat                          | Site is flat with no significant land surface changes                                                                                                                                                                                     |
|                                 | Gentle slope (<2 %)           |                                                                                                                                                                                                                                           |
|                                 | Hilltop                       | Site is on the top of a hill                                                                                                                                                                                                              |
|                                 | Medium Slope (>2 %, <5%)      |                                                                                                                                                                                                                                           |
|                                 | Significant Slope (>5%, <10%) |                                                                                                                                                                                                                                           |
|                                 | Strong Slope (>10%)           |                                                                                                                                                                                                                                           |
|                                 | Undulated/Variable            |                                                                                                                                                                                                                                           |
|                                 | Valley                        | Site is in a valley, with slopes all around                                                                                                                                                                                               |

The FLUXNET2015 dataset and the ONEFlux processing pipeline for eddy covariance data  
 Supplementary Materials, Table SM7

|                              |                    |                            |
|------------------------------|--------------------|----------------------------|
| TOWER_POWER<br>(TOWER_POWER) | Direct power       | A/C power connection       |
|                              | Gasoline generator |                            |
|                              | Methanol generator |                            |
|                              | Other              | Other type of power source |
|                              | Solar + generator  |                            |
|                              | Solar panels       | Solar panels and batteries |
|                              | Wind generator     |                            |
| TOWER_TYPE<br>(TOWER_TYPE)   | other              | Other type of tower        |
|                              | pole               |                            |
|                              | triangle           |                            |
|                              | tripod             |                            |
|                              | walk-up            |                            |
